# Supplementary material for: Insight Into Biological Targets and Molecular Mechanisms in the Treatment of Arsenic-Related Dermatitis With Vitamin A via Integrated in silico Approach
Source: Front Nutr. 2022 May 23;9:847320. doi: 10.3389/fnut.2022.847320 (PMC9171494; doi:10.3389/fnut.2022.847320)
Supplement: Supplementary file 3 [file Table_3.XLSX]

## Sheet: Sheet1
ID	description	GeneRatio	BgRatio	pValue	FDR	qvalue	geneID	size	DB	enrichmentRatio
hsa05142	Chagas disease (American trypanosomiasis)	16/29	102/7914	1.01001431130656e-23	1.87862661903019e-21	3.50847076559119e-22	JUN/MAPK3/MAPK1/MAPK14/IL6/AKT1/FOS/TNF/IL10/IL2/IL1B/CXCL8/TGFB1/IFNG/NOS2/CCL2	16	pathway_KEGG	0.551724137931034
hsa04933	AGE-RAGE signaling pathway in diabetic complications	15/29	100/7914	7.55048922723011e-22	7.02195498132401e-20	1.31140076051891e-20	JUN/MAPK3/MAPK1/MAPK14/IL6/AKT1/STAT1/TNF/CASP3/IL1B/BCL2/CXCL8/TGFB1/CCL2/VEGFA	15	pathway_KEGG	0.517241379310345
hsa05161	Hepatitis B	16/29	162/7914	2.42395819961828e-20	1.50285408376334e-18	2.80668844166328e-19	JUN/TP53/MAPK3/MAPK1/MAPK14/IL6/AKT1/STAT1/FOS/TNF/CREB1/CASP3/CDKN1A/BCL2/CXCL8/TGFB1	16	pathway_KEGG	0.551724137931034
hsa05140	Leishmaniasis	13/29	76/7914	1.21140627991359e-19	5.63303920159821e-18	1.05201071676707e-18	JUN/MAPK3/MAPK1/MAPK14/STAT1/FOS/TNF/IL10/IL4/IL1B/TGFB1/IFNG/NOS2	13	pathway_KEGG	0.448275862068966
hsa04657	IL-17 signaling pathway	13/29	93/7914	1.99350669211035e-18	7.41584489465051e-17	1.38496254399245e-17	JUN/MAPK3/MAPK1/MAPK14/IL6/FOS/TNF/CASP3/IL4/IL1B/CXCL8/IFNG/CCL2	13	pathway_KEGG	0.448275862068966
hsa05163	Human cytomegalovirus infection	16/29	225/7914	5.23911996441513e-18	1.62412718896869e-16	3.03317471624034e-17	TP53/MAPK3/MAPK1/MAPK14/IL6/AKT1/TNF/CREB1/SP1/CASP3/CDKN1A/EGFR/IL1B/CXCL8/CCL2/VEGFA	16	pathway_KEGG	0.551724137931034
hsa05152	Tuberculosis	15/29	179/7914	6.7729980234068e-18	1.79968233193381e-16	3.36103661311916e-17	MAPK3/MAPK1/MAPK14/IL6/AKT1/STAT1/TNF/CREB1/IL10/CASP3/IL1B/BCL2/TGFB1/IFNG/NOS2	15	pathway_KEGG	0.517241379310345
hsa05133	Pertussis	12/29	76/7914	1.13390437622187e-17	2.63632767471584e-16	4.92353215991074e-17	JUN/MAPK3/MAPK1/MAPK14/IL6/FOS/TNF/IL10/CASP3/IL1B/CXCL8/NOS2	12	pathway_KEGG	0.413793103448276
hsa05145	Toxoplasmosis	13/29	112/7914	2.51692442092668e-17	5.20164380324847e-16	9.71444513340122e-17	MAPK3/MAPK1/MAPK14/AKT1/STAT1/TNF/IL10/CASP3/BCL2/TGFB1/IFNG/BCL2L1/NOS2	13	pathway_KEGG	0.448275862068966
hsa05135	Yersinia infection	13/29	120/7914	6.39030388039542e-17	1.18859652175355e-15	2.21978976897946e-16	JUN/MAPK3/MAPK1/MAPK14/IL6/AKT1/FOS/TNF/IL10/IL2/IL1B/CXCL8/CCL2	13	pathway_KEGG	0.448275862068966
hsa01522	Endocrine resistance	12/29	98/7914	2.8411345261085e-16	4.80410019869256e-15	8.97200376665843e-16	JUN/TP53/MAPK3/MAPK1/MAPK14/AKT1/FOS/ESR1/SP1/CDKN1A/EGFR/BCL2	12	pathway_KEGG	0.413793103448276
hsa05167	Kaposi sarcoma-associated herpesvirus infection	14/29	186/7914	5.47881840170858e-16	8.4921685226483e-15	1.58597374786301e-15	JUN/TP53/MAPK3/MAPK1/MAPK14/IL6/AKT1/STAT1/FOS/CREB1/CASP3/CDKN1A/CXCL8/VEGFA	14	pathway_KEGG	0.482758620689655
hsa04659	Th17 cell differentiation	12/29	107/7914	8.51443259207515e-16	1.21821881701998e-14	2.2751115428217e-15	JUN/MAPK3/MAPK1/MAPK14/IL6/STAT1/FOS/IL2/IL4/IL1B/TGFB1/IFNG	12	pathway_KEGG	0.413793103448276
hsa04668	TNF signaling pathway	12/29	112/7914	1.50201491611682e-15	1.99553410284091e-14	3.72680392720714e-15	JUN/MAPK3/MAPK1/MAPK14/IL6/AKT1/FOS/TNF/CREB1/CASP3/IL1B/CCL2	12	pathway_KEGG	0.413793103448276
hsa05210	Colorectal cancer	11/29	86/7914	3.81119120159789e-15	4.72587708998139e-14	8.82591646685828e-15	JUN/TP53/MAPK3/MAPK1/AKT1/FOS/CASP3/CDKN1A/EGFR/BCL2/TGFB1	11	pathway_KEGG	0.379310344827586
hsa04380	Osteoclast differentiation	12/29	128/7914	7.81286360895402e-15	9.08245394540905e-14	1.6962138098387e-14	JUN/MAPK3/MAPK1/MAPK14/AKT1/STAT1/FOS/TNF/CREB1/IL1B/TGFB1/IFNG	12	pathway_KEGG	0.413793103448276
hsa05321	Inflammatory bowel disease (IBD)	10/29	65/7914	1.20350100634342e-14	1.31677168929338e-13	2.45916614299274e-14	JUN/IL6/STAT1/TNF/IL10/IL2/IL4/IL1B/TGFB1/IFNG	10	pathway_KEGG	0.344827586206897
hsa04620	Toll-like receptor signaling pathway	11/29	104/7914	3.34534164187208e-14	3.11116772694103e-13	5.81033022009361e-14	JUN/MAPK3/MAPK1/MAPK14/IL6/AKT1/STAT1/FOS/TNF/IL1B/CXCL8	11	pathway_KEGG	0.379310344827586
hsa04625	C-type lectin receptor signaling pathway	11/29	104/7914	3.34534164187208e-14	3.11116772694103e-13	5.81033022009361e-14	JUN/MAPK3/MAPK1/MAPK14/IL6/AKT1/STAT1/TNF/IL10/IL2/IL1B	11	pathway_KEGG	0.379310344827586
hsa04660	T cell receptor signaling pathway	11/29	104/7914	3.34534164187208e-14	3.11116772694103e-13	5.81033022009361e-14	JUN/MAPK3/MAPK1/MAPK14/AKT1/FOS/TNF/IL10/IL2/IL4/IFNG	11	pathway_KEGG	0.379310344827586
hsa05212	Pancreatic cancer	10/29	75/7914	5.45157308200555e-14	4.82853615834777e-13	9.01763968452046e-14	TP53/MAPK3/MAPK1/AKT1/STAT1/CDKN1A/EGFR/TGFB1/BCL2L1/VEGFA	10	pathway_KEGG	0.344827586206897
hsa05132	Salmonella infection	10/29	80/7914	1.0709797894531e-13	9.05464731083079e-13	1.69102072018911e-13	JUN/MAPK3/MAPK1/MAPK14/IL6/FOS/IL1B/CXCL8/IFNG/NOS2	10	pathway_KEGG	0.344827586206897
hsa04630	Jak-STAT signaling pathway	12/29	162/7914	1.38160349337891e-13	1.11729673812382e-12	2.08663227832971e-13	IL6/AKT1/STAT1/IL10/IL2/CDKN1A/IL4/EGFR/MCL1/BCL2/IFNG/BCL2L1	12	pathway_KEGG	0.413793103448276
hsa05166	Human T-cell leukemia virus 1 infection	13/29	219/7914	1.79701061104678e-13	1.39268322356125e-12	2.6009364107256e-13	JUN/TP53/MAPK3/MAPK1/IL6/AKT1/FOS/TNF/CREB1/IL2/CDKN1A/TGFB1/BCL2L1	13	pathway_KEGG	0.448275862068966
hsa04926	Relaxin signaling pathway	11/29	129/7914	3.78477075098108e-13	2.81586943872992e-12	5.25883935925792e-13	JUN/MAPK3/MAPK1/MAPK14/AKT1/FOS/CREB1/EGFR/TGFB1/NOS2/VEGFA	11	pathway_KEGG	0.379310344827586
hsa05323	Rheumatoid arthritis	10/29	93/7914	5.10691091925451e-13	3.62462918105933e-12	6.76925653508533e-13	JUN/IL6/FOS/TNF/IL1B/CXCL8/TGFB1/IFNG/CCL2/VEGFA	10	pathway_KEGG	0.344827586206897
hsa04621	NOD-like receptor signaling pathway	12/29	181/7914	5.26155848863451e-13	3.62462918105933e-12	6.76925653508533e-13	JUN/MAPK3/MAPK1/MAPK14/IL6/STAT1/TNF/IL1B/BCL2/CXCL8/BCL2L1/CCL2	12	pathway_KEGG	0.413793103448276
hsa04210	Apoptosis	11/29	136/7914	6.82517941154909e-13	4.53386918052904e-12	8.46732784139549e-13	JUN/TP53/MAPK3/MAPK1/AKT1/FOS/TNF/CASP3/MCL1/BCL2/BCL2L1	11	pathway_KEGG	0.379310344827586
hsa05162	Measles	11/29	138/7914	8.02972394466602e-13	5.15009880588924e-12	9.61818113154187e-13	JUN/TP53/IL6/AKT1/STAT1/FOS/IL2/CASP3/IL1B/BCL2/BCL2L1	11	pathway_KEGG	0.379310344827586
hsa05418	Fluid shear stress and atherosclerosis	11/29	139/7914	8.70133484512998e-13	5.39482760398059e-12	1.00752298206768e-12	JUN/TP53/MAPK14/AKT1/FOS/TNF/IL1B/BCL2/IFNG/CCL2/VEGFA	11	pathway_KEGG	0.379310344827586
hsa05205	Proteoglycans in cancer	12/29	204/7914	2.20239764606585e-12	1.32143858763951e-11	2.46788191239977e-12	TP53/MAPK3/MAPK1/MAPK14/AKT1/ESR1/TNF/CASP3/CDKN1A/EGFR/TGFB1/VEGFA	12	pathway_KEGG	0.413793103448276
hsa04066	HIF-1 signaling pathway	10/29	109/7914	2.60135369538275e-12	1.51203683544122e-11	2.82383789301417e-12	MAPK3/MAPK1/IL6/AKT1/CDKN1A/EGFR/BCL2/IFNG/NOS2/VEGFA	10	pathway_KEGG	0.344827586206897
hsa04151	PI3K-Akt signaling pathway	14/29	354/7914	4.19858420043795e-12	2.36647473115594e-11	4.41956231625047e-12	TP53/MAPK3/MAPK1/IL6/AKT1/CREB1/IL2/CDKN1A/IL4/EGFR/MCL1/BCL2/BCL2L1/VEGFA	14	pathway_KEGG	0.482758620689655
hsa05144	Malaria	8/29	49/7914	4.61909438107435e-12	2.52691633788185e-11	4.7191985936673e-12	IL6/TNF/IL10/IL1B/CXCL8/TGFB1/IFNG/CCL2	8	pathway_KEGG	0.275862068965517
hsa05164	Influenza A	11/29	170/7914	8.04741476622772e-12	4.23734094935894e-11	7.91353997333589e-12	MAPK3/MAPK1/IL6/AKT1/STAT1/TNF/CASP3/IL1B/CXCL8/IFNG/CCL2	11	pathway_KEGG	0.379310344827586
hsa04010	MAPK signaling pathway	13/29	295/7914	8.20130506327537e-12	4.23734094935894e-11	7.91353997333589e-12	JUN/TP53/MAPK3/MAPK1/MAPK14/AKT1/FOS/TNF/CASP3/EGFR/IL1B/TGFB1/VEGFA	13	pathway_KEGG	0.448275862068966
hsa05235	PD-L1 expression and PD-1 checkpoint pathway in cancer	9/29	89/7914	1.58685642542164e-11	7.9771701386061e-11	1.48979408361065e-11	JUN/MAPK3/MAPK1/MAPK14/AKT1/STAT1/FOS/EGFR/IFNG	9	pathway_KEGG	0.310344827586207
hsa04658	Th1 and Th2 cell differentiation	9/29	92/7914	2.15397232524897e-11	1.05431276972713e-10	1.96900517266526e-11	JUN/MAPK3/MAPK1/MAPK14/STAT1/FOS/IL2/IL4/IFNG	9	pathway_KEGG	0.310344827586207
hsa04915	Estrogen signaling pathway	10/29	138/7914	2.82895321945084e-11	1.34919307389194e-10	2.51971541813435e-11	JUN/MAPK3/MAPK1/AKT1/FOS/ESR1/CREB1/SP1/EGFR/BCL2	10	pathway_KEGG	0.344827586206897
hsa05224	Breast cancer	10/29	147/7914	5.32626429586284e-11	2.47671289757622e-10	4.6254400464072e-11	JUN/TP53/MAPK3/MAPK1/AKT1/FOS/ESR1/SP1/CDKN1A/EGFR	10	pathway_KEGG	0.344827586206897
hsa05146	Amoebiasis	9/29	102/7914	5.54979349913996e-11	2.51771119717081e-10	4.70200732918148e-11	IL6/TNF/IL10/CASP3/IL1B/CXCL8/TGFB1/IFNG/NOS2	9	pathway_KEGG	0.310344827586207
hsa05219	Bladder cancer	7/29	41/7914	8.39363854599278e-11	3.71718278465394e-10	6.94210706811433e-11	TP53/MAPK3/MAPK1/CDKN1A/EGFR/CXCL8/VEGFA	7	pathway_KEGG	0.241379310344828
hsa05160	Hepatitis C	10/29	155/7914	9.03700218537628e-11	3.90902885227904e-10	7.30039344228684e-11	TP53/MAPK3/MAPK1/AKT1/STAT1/TNF/CASP3/CDKN1A/EGFR/IFNG	10	pathway_KEGG	0.344827586206897
hsa01524	Platinum drug resistance	8/29	73/7914	1.30053385724409e-10	5.49771130562276e-10	1.02673725571902e-10	TP53/MAPK3/MAPK1/AKT1/CASP3/CDKN1A/BCL2/BCL2L1	8	pathway_KEGG	0.275862068965517
hsa01521	EGFR tyrosine kinase inhibitor resistance	8/29	79/7914	2.48835779494338e-10	1.02852122190993e-09	1.92083759609665e-10	MAPK3/MAPK1/IL6/AKT1/EGFR/BCL2/BCL2L1/VEGFA	8	pathway_KEGG	0.275862068965517
hsa04068	FoxO signaling pathway	9/29	131/7914	5.35834453016512e-10	2.1666349621972e-09	4.04634712804231e-10	MAPK3/MAPK1/MAPK14/IL6/AKT1/IL10/CDKN1A/EGFR/TGFB1	9	pathway_KEGG	0.310344827586207
hsa05130	Pathogenic Escherichia coli infection	10/29	201/7914	1.17539862195466e-09	4.55466966007433e-09	8.50617423782981e-10	JUN/MAPK3/MAPK1/MAPK14/IL6/FOS/TNF/CASP3/IL1B/CXCL8	10	pathway_KEGG	0.344827586206897
hsa05169	Epstein-Barr virus infection	10/29	201/7914	1.17539862195466e-09	4.55466966007433e-09	8.50617423782981e-10	JUN/TP53/MAPK14/IL6/AKT1/STAT1/TNF/CASP3/CDKN1A/BCL2	10	pathway_KEGG	0.344827586206897
hsa05215	Prostate cancer	8/29	97/7914	1.32064120885862e-09	5.01304622138169e-09	9.36222554078075e-10	TP53/MAPK3/MAPK1/AKT1/CREB1/CDKN1A/EGFR/BCL2	8	pathway_KEGG	0.275862068965517
hsa05170	Human immunodeficiency virus 1 infection	10/29	212/7914	1.97758472963203e-09	7.35661519423116e-09	1.37390097006015e-09	JUN/MAPK3/MAPK1/MAPK14/AKT1/FOS/TNF/CASP3/BCL2/BCL2L1	10	pathway_KEGG	0.344827586206897
hsa04928	Parathyroid hormone synthesis, secretion and action	8/29	106/7914	2.69740629923366e-09	9.83759944426392e-09	1.83724268059258e-09	MAPK3/MAPK1/FOS/CREB1/SP1/CDKN1A/EGFR/BCL2	8	pathway_KEGG	0.275862068965517
hsa04218	Cellular senescence	9/29	160/7914	3.19241817734712e-09	1.14190342497416e-08	2.13258704154767e-09	TP53/MAPK3/MAPK1/MAPK14/IL6/AKT1/CDKN1A/CXCL8/TGFB1	9	pathway_KEGG	0.310344827586207
hsa05211	Renal cell carcinoma	7/29	69/7914	3.76142484704993e-09	1.32004721047413e-08	2.46528341514693e-09	JUN/MAPK3/MAPK1/AKT1/CDKN1A/TGFB1/VEGFA	7	pathway_KEGG	0.241379310344828
hsa04917	Prolactin signaling pathway	7/29	70/7914	4.16913989115909e-09	1.43603707362146e-08	2.68190285396198e-09	MAPK3/MAPK1/MAPK14/AKT1/STAT1/FOS/ESR1	7	pathway_KEGG	0.241379310344828
hsa05220	Chronic myeloid leukemia	7/29	76/7914	7.49229012572299e-09	2.53375629706268e-08	4.73197271098294e-09	TP53/MAPK3/MAPK1/AKT1/CDKN1A/TGFB1/BCL2L1	7	pathway_KEGG	0.241379310344828
hsa05165	Human papillomavirus infection	11/29	330/7914	9.90541826447358e-09	3.2900139235573e-08	6.14433839713587e-09	TP53/MAPK3/MAPK1/AKT1/STAT1/TNF/CREB1/CASP3/CDKN1A/EGFR/VEGFA	11	pathway_KEGG	0.379310344827586
hsa05014	Amyotrophic lateral sclerosis (ALS)	6/29	51/7914	2.24464897768248e-08	7.32464403243758e-08	1.36793012490345e-08	TP53/MAPK14/TNF/CASP3/BCL2/BCL2L1	6	pathway_KEGG	0.206896551724138
hsa05222	Small cell lung cancer	7/29	92/7914	2.88686140950014e-08	9.25786589943149e-08	1.72897325795834e-08	TP53/AKT1/CASP3/CDKN1A/BCL2/BCL2L1/NOS2	7	pathway_KEGG	0.241379310344828
hsa04932	Non-alcoholic fatty liver disease (NAFLD)	8/29	149/7914	4.01708294311834e-08	1.24529571236668e-07	2.32567959864746e-08	JUN/IL6/AKT1/TNF/CASP3/IL1B/CXCL8/TGFB1	8	pathway_KEGG	0.275862068965517
hsa05226	Gastric cancer	8/29	149/7914	4.01708294311834e-08	1.24529571236668e-07	2.32567959864746e-08	TP53/MAPK3/MAPK1/AKT1/CDKN1A/EGFR/BCL2/TGFB1	8	pathway_KEGG	0.275862068965517
hsa05231	Choline metabolism in cancer	7/29	98/7914	4.49223916512772e-08	1.36976472903894e-07	2.55813446849378e-08	JUN/MAPK3/MAPK1/AKT1/FOS/SP1/EGFR	7	pathway_KEGG	0.241379310344828
hsa04060	Cytokine-cytokine receptor interaction	10/29	294/7914	4.60112323523251e-08	1.38033697056975e-07	2.57787889240531e-08	IL6/TNF/IL10/IL2/IL4/IL1B/CXCL8/TGFB1/IFNG/CCL2	10	pathway_KEGG	0.344827586206897
hsa05213	Endometrial cancer	6/29	58/7914	4.95711685152166e-08	1.46352973711592e-07	2.73324738680392e-08	TP53/MAPK3/MAPK1/AKT1/CDKN1A/EGFR	6	pathway_KEGG	0.206896551724138
hsa05225	Hepatocellular carcinoma	8/29	168/7914	1.02488798649977e-07	2.97858071076495e-07	5.56271440040992e-08	TP53/MAPK3/MAPK1/AKT1/CDKN1A/EGFR/TGFB1/BCL2L1	8	pathway_KEGG	0.275862068965517
hsa05223	Non-small cell lung cancer	6/29	66/7914	1.09069988087822e-07	3.12107965912845e-07	5.82884146866094e-08	TP53/MAPK3/MAPK1/AKT1/CDKN1A/EGFR	6	pathway_KEGG	0.206896551724138
hsa04664	Fc epsilon RI signaling pathway	6/29	68/7914	1.30734988063997e-07	3.68434966362174e-07	6.88078884547355e-08	MAPK3/MAPK1/MAPK14/AKT1/TNF/IL4	6	pathway_KEGG	0.206896551724138
hsa04071	Sphingolipid signaling pathway	7/29	119/7914	1.72755169884853e-07	4.72536199979156e-07	8.82495449876183e-08	TP53/MAPK3/MAPK1/MAPK14/AKT1/TNF/BCL2	7	pathway_KEGG	0.241379310344828
hsa04722	Neurotrophin signaling pathway	7/29	119/7914	1.72755169884853e-07	4.72536199979156e-07	8.82495449876183e-08	JUN/TP53/MAPK3/MAPK1/MAPK14/AKT1/BCL2	7	pathway_KEGG	0.241379310344828
hsa05143	African trypanosomiasis	5/29	37/7914	1.84747487420021e-07	4.90924728550144e-07	9.16837353828792e-08	IL6/TNF/IL10/IL1B/IFNG	5	pathway_KEGG	0.172413793103448
hsa05218	Melanoma	6/29	72/7914	1.84756618271559e-07	4.90924728550144e-07	9.16837353828792e-08	TP53/MAPK3/MAPK1/AKT1/CDKN1A/EGFR	6	pathway_KEGG	0.206896551724138
hsa05330	Allograft rejection	5/29	38/7914	2.12200959319048e-07	5.55906738497789e-07	1.03819594626073e-07	TNF/IL10/IL2/IL4/IFNG	5	pathway_KEGG	0.172413793103448
hsa05214	Glioma	6/29	75/7914	2.36329756208793e-07	6.10518536872716e-07	1.14018742030558e-07	TP53/MAPK3/MAPK1/AKT1/CDKN1A/EGFR	6	pathway_KEGG	0.206896551724138
hsa05332	Graft-versus-host disease	5/29	41/7914	3.14415210030875e-07	8.01112726927982e-07	1.4961358227857e-07	IL6/TNF/IL2/IL1B/IFNG	5	pathway_KEGG	0.172413793103448
hsa04012	ErbB signaling pathway	6/29	85/7914	5.00602197856381e-07	1.25827038920658e-06	2.3499107438493e-07	JUN/MAPK3/MAPK1/AKT1/CDKN1A/EGFR	6	pathway_KEGG	0.206896551724138
hsa05168	Herpes simplex virus 1 infection	11/29	491/7914	5.8347540513848e-07	1.44701900474343e-06	2.70241240274665e-07	TP53/IL6/AKT1/STAT1/TNF/CASP3/IL1B/BCL2/IFNG/BCL2L1/CCL2	11	pathway_KEGG	0.379310344827586
hsa04672	Intestinal immune network for IgA production	5/29	49/7914	7.83982222135279e-07	1.91869333312055e-06	3.58329824521665e-07	IL6/IL10/IL2/IL4/TGFB1	5	pathway_KEGG	0.172413793103448
hsa04350	TGF-beta signaling pathway	6/29	94/7914	9.11165869197233e-07	2.20099807364526e-06	4.11052271818301e-07	MAPK3/MAPK1/TNF/SP1/TGFB1/IFNG	6	pathway_KEGG	0.206896551724138
hsa05206	MicroRNAs in cancer	9/29	310/7914	9.68919668846021e-07	2.31050074878667e-06	4.31502686530617e-07	TP53/MAPK3/MAPK1/CASP3/CDKN1A/EGFR/MCL1/BCL2/VEGFA	9	pathway_KEGG	0.310344827586207
hsa04061	Viral protein interaction with cytokine and cytokine receptor	6/29	100/7914	1.31405910709398e-06	3.09386068252507e-06	5.7780080658363e-07	IL6/TNF/IL10/IL2/CXCL8/CCL2	6	pathway_KEGG	0.206896551724138
hsa05134	Legionellosis	5/29	56/7914	1.54281730697372e-06	3.58705023871389e-06	6.69907514870166e-07	IL6/TNF/CASP3/IL1B/CXCL8	5	pathway_KEGG	0.172413793103448
hsa04370	VEGF signaling pathway	5/29	59/7914	2.00674230743471e-06	4.60807492818341e-06	8.60591242954457e-07	MAPK3/MAPK1/MAPK14/AKT1/VEGFA	5	pathway_KEGG	0.172413793103448
hsa04725	Cholinergic synapse	6/29	112/7914	2.55901348979694e-06	5.80459157441745e-06	1.08404936024774e-06	MAPK3/MAPK1/AKT1/FOS/CREB1/BCL2	6	pathway_KEGG	0.206896551724138
hsa04919	Thyroid hormone signaling pathway	6/29	119/7914	3.64707841908968e-06	8.17297091506844e-06	1.52636129143893e-06	TP53/MAPK3/MAPK1/AKT1/STAT1/ESR1	6	pathway_KEGG	0.206896551724138
hsa05230	Central carbon metabolism in cancer	5/29	69/7914	4.39195454321191e-06	9.72504220282636e-06	1.81622180358387e-06	TP53/MAPK3/MAPK1/AKT1/EGFR	5	pathway_KEGG	0.172413793103448
hsa05120	Epithelial cell signaling in Helicobacter pylori infection	5/29	70/7914	4.71781051198471e-06	1.03236794732842e-05	1.92802163338075e-06	JUN/MAPK14/CASP3/EGFR/CXCL8	5	pathway_KEGG	0.172413793103448
hsa04115	p53 signaling pathway	5/29	72/7914	5.42635798805655e-06	1.173607657882e-05	2.19179698415993e-06	TP53/CASP3/CDKN1A/BCL2/BCL2L1	5	pathway_KEGG	0.172413793103448
hsa04510	Focal adhesion	7/29	199/7914	5.58075162604301e-06	1.19312620970575e-05	2.22824928807525e-06	JUN/MAPK3/MAPK1/AKT1/EGFR/BCL2/VEGFA	7	pathway_KEGG	0.241379310344828
hsa05203	Viral carcinogenesis	7/29	201/7914	5.96228983353481e-06	1.26021126026986e-05	2.35353546060585e-06	JUN/TP53/MAPK3/MAPK1/CREB1/CASP3/CDKN1A	7	pathway_KEGG	0.241379310344828
hsa05020	Prion diseases	4/29	35/7914	7.03970786912296e-06	1.47121984680547e-05	2.74760922153823e-06	MAPK3/MAPK1/IL6/IL1B	4	pathway_KEGG	0.137931034482759
hsa05216	Thyroid cancer	4/29	37/7914	8.8347874133655e-06	1.82585606542887e-05	3.40991794901826e-06	TP53/MAPK3/MAPK1/CDKN1A	4	pathway_KEGG	0.137931034482759
hsa04662	B cell receptor signaling pathway	5/29	82/7914	1.03168993718503e-05	2.10872888259796e-05	3.93820334610825e-06	JUN/MAPK3/MAPK1/AKT1/FOS	5	pathway_KEGG	0.172413793103448
hsa04261	Adrenergic signaling in cardiomyocytes	6/29	149/7914	1.33771249603653e-05	2.70450569850863e-05	5.05085953881069e-06	MAPK3/MAPK1/MAPK14/AKT1/CREB1/BCL2	6	pathway_KEGG	0.206896551724138
hsa04921	Oxytocin signaling pathway	6/29	153/7914	1.55666059892819e-05	3.11332119785637e-05	5.81435198241428e-06	JUN/MAPK3/MAPK1/FOS/CDKN1A/EGFR	6	pathway_KEGG	0.206896551724138
hsa04940	Type I diabetes mellitus	4/29	43/7914	1.62596083979985e-05	3.2173267681146e-05	6.00858988951792e-06	TNF/IL2/IL1B/IFNG	4	pathway_KEGG	0.137931034482759
hsa04934	Cushing syndrome	6/29	155/7914	1.67653383663366e-05	3.28247677488275e-05	6.13026222813416e-06	MAPK3/MAPK1/CREB1/SP1/CDKN1A/EGFR	6	pathway_KEGG	0.206896551724138
hsa04912	GnRH signaling pathway	5/29	93/7914	1.91097105640718e-05	3.70250642178892e-05	6.91469790147337e-06	JUN/MAPK3/MAPK1/MAPK14/EGFR	5	pathway_KEGG	0.172413793103448
hsa04064	NF-kappa B signaling pathway	5/29	102/7914	2.99340352549435e-05	5.73992840971082e-05	1.07197304765397e-05	TNF/IL1B/BCL2/CXCL8/BCL2L1	5	pathway_KEGG	0.172413793103448
hsa05202	Transcriptional misregulation in cancer	6/29	186/7914	4.70703016405211e-05	8.93375112769074e-05	1.66844248564683e-05	TP53/IL6/SP1/CDKN1A/CXCL8/BCL2L1	6	pathway_KEGG	0.206896551724138
hsa04062	Chemokine signaling pathway	6/29	189/7914	5.14899347303896e-05	9.67386652510349e-05	1.8066643765049e-05	MAPK3/MAPK1/AKT1/STAT1/CXCL8/CCL2	6	pathway_KEGG	0.206896551724138
hsa04137	Mitophagy - animal	4/29	65/7914	8.43701140290125e-05	0.000156928412093963	2.93075132942886e-05	JUN/TP53/SP1/BCL2L1	4	pathway_KEGG	0.137931034482759
hsa04015	Rap1 signaling pathway	6/29	210/7914	9.26340731799706e-05	0.000170593441697768	3.18595561744558e-05	MAPK3/MAPK1/MAPK14/AKT1/EGFR/VEGFA	6	pathway_KEGG	0.206896551724138
hsa05131	Shigellosis	4/29	67/7914	9.50334732872631e-05	0.00017329633364148	3.23643407479843e-05	MAPK3/MAPK1/MAPK14/CXCL8	4	pathway_KEGG	0.137931034482759
hsa04650	Natural killer cell mediated cytotoxicity	5/29	131/7914	9.93562947399339e-05	0.000179420105064347	3.35079992480104e-05	MAPK3/MAPK1/TNF/CASP3/IFNG	5	pathway_KEGG	0.172413793103448
hsa04024	cAMP signaling pathway	6/29	216/7914	0.00010826199335775	0.000193622411197515	3.61603823968194e-05	JUN/MAPK3/MAPK1/AKT1/FOS/CREB1	6	pathway_KEGG	0.206896551724138
hsa04140	Autophagy - animal	5/29	137/7914	0.000122829281767063	0.000217583299130226	4.06352511109081e-05	MAPK3/MAPK1/AKT1/BCL2/BCL2L1	5	pathway_KEGG	0.172413793103448
hsa04014	Ras signaling pathway	6/29	232/7914	0.000160414715760963	0.000281482425769237	5.25688740825399e-05	MAPK3/MAPK1/AKT1/EGFR/BCL2L1/VEGFA	6	pathway_KEGG	0.206896551724138
hsa04072	Phospholipase D signaling pathway	5/29	148/7914	0.00017671186114695	0.000307181366105913	5.73683366241943e-05	MAPK3/MAPK1/AKT1/EGFR/CXCL8	5	pathway_KEGG	0.172413793103448
hsa01523	Antifolate resistance	3/29	31/7914	0.000185627068800173	0.00031675811740213	5.91568640309581e-05	IL6/TNF/IL1B	3	pathway_KEGG	0.103448275862069
hsa05310	Asthma	3/29	31/7914	0.000185627068800173	0.00031675811740213	5.91568640309581e-05	TNF/IL10/IL4	3	pathway_KEGG	0.103448275862069
hsa04215	Apoptosis - multiple species	3/29	32/7914	0.000204325908837694	0.00034549653676192	6.45239712119035e-05	CASP3/BCL2/BCL2L1	3	pathway_KEGG	0.103448275862069
hsa04217	Necroptosis	5/29	162/7914	0.000269557129062049	0.000451690324374244	8.43564273024905e-05	STAT1/TNF/IL1B/BCL2/IFNG	5	pathway_KEGG	0.172413793103448
hsa05010	Alzheimer disease	5/29	171/7914	0.000346375167053343	0.000575230188142159	0.000107428388277823	MAPK3/MAPK1/TNF/CASP3/IL1B	5	pathway_KEGG	0.172413793103448
hsa04713	Circadian entrainment	4/29	97/7914	0.000398184840544794	0.000655419295056033	0.000122404282608088	MAPK3/MAPK1/FOS/CREB1	4	pathway_KEGG	0.137931034482759
hsa04640	Hematopoietic cell lineage	4/29	98/7914	0.000414079702562895	0.00066972891023216	0.00012507670649497	IL6/TNF/IL4/IL1B	4	pathway_KEGG	0.137931034482759
hsa04914	Progesterone-mediated oocyte maturation	4/29	98/7914	0.000414079702562895	0.00066972891023216	0.00012507670649497	MAPK3/MAPK1/MAPK14/AKT1	4	pathway_KEGG	0.137931034482759
hsa04931	Insulin resistance	4/29	108/7914	0.000598969295198798	0.000960416283680831	0.000179364670976047	IL6/AKT1/TNF/CREB1	4	pathway_KEGG	0.137931034482759
hsa04930	Type II diabetes mellitus	3/29	46/7914	0.000604148081077982	0.000960440539149613	0.00017936920085986	MAPK3/MAPK1/TNF	3	pathway_KEGG	0.103448275862069
hsa05320	Autoimmune thyroid disease	3/29	53/7914	0.000916410818536361	0.00144451196820138	0.000269773033110615	IL10/IL2/IL4	3	pathway_KEGG	0.103448275862069
hsa04611	Platelet activation	4/29	124/7914	0.00100691583690841	0.00157383483752071	0.000293925012100642	MAPK3/MAPK1/MAPK14/AKT1	4	pathway_KEGG	0.137931034482759
hsa04728	Dopaminergic synapse	4/29	131/7914	0.00123550634670166	0.00191503483738758	0.000357646574045218	MAPK14/AKT1/FOS/CREB1	4	pathway_KEGG	0.137931034482759
hsa04371	Apelin signaling pathway	4/29	137/7914	0.00145860387105165	0.00224215140508766	0.000418737953411956	MAPK3/MAPK1/AKT1/NOS2	4	pathway_KEGG	0.137931034482759
hsa04550	Signaling pathways regulating pluripotency of stem cells	4/29	140/7914	0.00158010642183555	0.0023989150270181	0.000448014690954144	MAPK3/MAPK1/MAPK14/AKT1	4	pathway_KEGG	0.137931034482759
hsa04929	GnRH secretion New!	3/29	64/7914	0.00158637929206035	0.0023989150270181	0.000448014690954144	MAPK3/MAPK1/AKT1	3	pathway_KEGG	0.103448275862069
hsa05221	Acute myeloid leukemia	3/29	67/7914	0.00181061075605971	0.00271591613408956	0.000507216935059171	MAPK3/MAPK1/AKT1	3	pathway_KEGG	0.103448275862069
hsa05031	Amphetamine addiction	3/29	68/7914	0.00188952889191895	0.0028116189911754	0.000525090134175372	JUN/FOS/CREB1	3	pathway_KEGG	0.103448275862069
hsa04622	RIG-I-like receptor signaling pathway	3/29	70/7914	0.00205375170228995	0.0030317287033804	0.00056619721115763	MAPK14/TNF/CXCL8	3	pathway_KEGG	0.103448275862069
hsa04520	Adherens junction	3/29	71/7914	0.00213909708028501	0.00313285084199222	0.000585082500202282	MAPK3/MAPK1/EGFR	3	pathway_KEGG	0.103448275862069
hsa04150	mTOR signaling pathway	4/29	153/7914	0.0021891135920987	0.00318105568851842	0.00059408510311889	MAPK3/MAPK1/AKT1/TNF	4	pathway_KEGG	0.137931034482759
hsa04612	Antigen processing and presentation	3/29	78/7914	0.00279871084478729	0.00403535052039098	0.000753630827237704	TNF/CREB1/IFNG	3	pathway_KEGG	0.103448275862069
hsa04022	cGMP-PKG signaling pathway	4/29	167/7914	0.00300914699471413	0.00430539493089867	0.000804063569437783	MAPK3/MAPK1/AKT1/CREB1	4	pathway_KEGG	0.137931034482759
hsa04540	Gap junction	3/29	88/7914	0.0039391343035784	0.00559296931653116	0.00104452737660175	MAPK3/MAPK1/EGFR	3	pathway_KEGG	0.103448275862069
hsa04211	Longevity regulating pathway	3/29	89/7914	0.00406655756717811	0.00573014929920553	0.00107014672820477	TP53/AKT1/CREB1	3	pathway_KEGG	0.103448275862069
hsa05410	Hypertrophic cardiomyopathy (HCM)	3/29	90/7914	0.00419647698096456	0.00586875728164968	0.0010960327690687	IL6/TNF/TGFB1	3	pathway_KEGG	0.103448275862069
hsa04666	Fc gamma R-mediated phagocytosis	3/29	93/7914	0.00460136107385705	0.0063869638786374	0.00119281159023789	MAPK3/MAPK1/AKT1	3	pathway_KEGG	0.103448275862069
hsa05016	Huntington disease	4/29	193/7914	0.00505119906091893	0.00695942981726609	0.00129972373497329	TP53/CREB1/SP1/CASP3	4	pathway_KEGG	0.137931034482759
hsa04916	Melanogenesis	3/29	101/7914	0.00579446084574746	0.00792477733315462	0.00148000934914602	MAPK3/MAPK1/CREB1	3	pathway_KEGG	0.103448275862069
hsa04960	Aldosterone-regulated sodium reabsorption	2/29	37/7914	0.00797602069316568	0.0108287580213782	0.00202234869669203	MAPK3/MAPK1	2	pathway_KEGG	0.0689655172413793
hsa04726	Serotonergic synapse	3/29	115/7914	0.00829554195951162	0.0111809478584722	0.00208812269003725	MAPK3/MAPK1/CASP3	3	pathway_KEGG	0.103448275862069
hsa04110	Cell cycle	3/29	124/7914	0.0101926072214052	0.0136390283682113	0.00254718696180517	TP53/CDKN1A/TGFB1	3	pathway_KEGG	0.103448275862069
hsa04114	Oocyte meiosis	3/29	127/7914	0.0108766764655582	0.0144504415899559	0.00269872423581519	MAPK3/MAPK1/MAPK14	3	pathway_KEGG	0.103448275862069
hsa05322	Systemic lupus erythematosus	3/29	133/7914	0.012323604611485	0.0162566699130227	0.00303605040820458	TNF/IL10/IFNG	3	pathway_KEGG	0.103448275862069
hsa04910	Insulin signaling pathway	3/29	137/7914	0.0133471510767165	0.0174828880300653	0.00326505548948588	MAPK3/MAPK1/AKT1	3	pathway_KEGG	0.103448275862069
hsa05030	Cocaine addiction	2/29	49/7914	0.0137070308442316	0.0178287254337558	0.00332964312005627	JUN/CREB1	2	pathway_KEGG	0.0689655172413793
hsa04723	Retrograde endocannabinoid signaling	3/29	148/7914	0.0164081460387147	0.0211938553000064	0.0039581054040759	MAPK3/MAPK1/MAPK14	3	pathway_KEGG	0.103448275862069
hsa04730	Long-term depression	2/29	60/7914	0.0201251863221537	0.0258157562477281	0.00482127875594244	MAPK3/MAPK1	2	pathway_KEGG	0.0689655172413793
hsa04623	Cytosolic DNA-sensing pathway	2/29	63/7914	0.0220564696523833	0.0279081860907708	0.00521205512730863	IL6/IL1B	2	pathway_KEGG	0.0689655172413793
hsa05217	Basal cell carcinoma	2/29	63/7914	0.0220564696523833	0.0279081860907708	0.00521205512730863	TP53/CDKN1A	2	pathway_KEGG	0.0689655172413793
hsa04927	Cortisol synthesis and secretion	2/29	65/7914	0.0233852947666828	0.0293896272067771	0.0054887249452385	CREB1/SP1	2	pathway_KEGG	0.0689655172413793
hsa04720	Long-term potentiation	2/29	67/7914	0.0247465593518943	0.0308916781171298	0.00576924379097501	MAPK3/MAPK1	2	pathway_KEGG	0.0689655172413793
hsa04920	Adipocytokine signaling pathway	2/29	69/7914	0.0261397526861746	0.0324132933308565	0.00605341641153516	AKT1/TNF	2	pathway_KEGG	0.0689655172413793
hsa05034	Alcoholism	3/29	184/7914	0.0289976414886357	0.035718949118452	0.00667077148222363	MAPK3/MAPK1/CREB1	3	pathway_KEGG	0.103448275862069
GO:0071216	cellular response to biotic stimulus	13/29	206/17913	2.42562101108413e-18	6.76020575789146e-15	1.72091427523232e-15	TP53/MAPK3/MAPK1/MAPK14/IL6/AKT1/TNF/IL10/IL1B/CXCL8/TGFB1/NOS2/CCL2	13	geneontology_Biological_Process	0.448275862068966
GO:0032496	response to lipopolysaccharide	14/29	295/17913	4.929235007411e-18	6.86888898282723e-15	1.74858126052369e-15	MAPK3/MAPK1/MAPK14/IL6/AKT1/FOS/TNF/IL10/CASP3/IL1B/CXCL8/TGFB1/NOS2/CCL2	14	geneontology_Biological_Process	0.482758620689655
GO:0002237	response to molecule of bacterial origin	14/29	309/17913	9.46502634966368e-18	8.79300947883756e-15	2.23839570514853e-15	MAPK3/MAPK1/MAPK14/IL6/AKT1/FOS/TNF/IL10/CASP3/IL1B/CXCL8/TGFB1/NOS2/CCL2	14	geneontology_Biological_Process	0.482758620689655
GO:0071222	cellular response to lipopolysaccharide	12/29	176/17913	2.48677043904132e-17	1.73265730340204e-14	4.41074546293118e-15	MAPK3/MAPK1/MAPK14/IL6/AKT1/TNF/IL10/IL1B/CXCL8/TGFB1/NOS2/CCL2	12	geneontology_Biological_Process	0.413793103448276
GO:0006979	response to oxidative stress	15/29	442/17913	3.42113712655303e-17	1.86082148438084e-14	4.73700708353704e-15	JUN/TP53/MAPK3/MAPK1/IL6/AKT1/STAT1/FOS/TNF/IL10/SP1/CASP3/EGFR/MCL1/BCL2	15	geneontology_Biological_Process	0.517241379310345
GO:0071219	cellular response to molecule of bacterial origin	12/29	183/17913	4.00607423978652e-17	1.86082148438084e-14	4.73700708353704e-15	MAPK3/MAPK1/MAPK14/IL6/AKT1/TNF/IL10/IL1B/CXCL8/TGFB1/NOS2/CCL2	12	geneontology_Biological_Process	0.413793103448276
GO:0000302	response to reactive oxygen species	12/29	230/17913	6.44525535248423e-16	2.56613238105336e-13	6.53248437229229e-14	JUN/MAPK3/MAPK1/IL6/AKT1/STAT1/FOS/TNF/IL10/CASP3/EGFR/BCL2	12	geneontology_Biological_Process	0.413793103448276
GO:0072593	reactive oxygen species metabolic process	12/29	269/17913	4.2575571713677e-15	1.4705663112549e-12	3.74355256089666e-13	TP53/MAPK14/AKT1/TNF/IL10/CDKN1A/EGFR/IL1B/BCL2/TGFB1/IFNG/NOS2	12	geneontology_Biological_Process	0.413793103448276
GO:0002521	leukocyte differentiation	14/29	485/17913	5.05465420053051e-15	1.4705663112549e-12	3.74355256089666e-13	JUN/TP53/MAPK14/IL6/FOS/TNF/CREB1/IL10/IL2/IL4/BCL2/TGFB1/IFNG/VEGFA	14	geneontology_Biological_Process	0.482758620689655
GO:2000377	regulation of reactive oxygen species metabolic process	11/29	194/17913	5.27652067188698e-15	1.4705663112549e-12	3.74355256089666e-13	TP53/MAPK14/AKT1/TNF/IL10/CDKN1A/EGFR/IL1B/BCL2/TGFB1/IFNG	11	geneontology_Biological_Process	0.379310344827586
GO:0009636	response to toxic substance	14/29	499/17913	7.48467122137051e-15	1.89634351763269e-12	4.82743387866385e-13	JUN/MAPK3/MAPK1/IL6/STAT1/FOS/TNF/CREB1/IL10/IL2/CASP3/CDKN1A/BCL2/BCL2L1	14	geneontology_Biological_Process	0.482758620689655
GO:0034599	cellular response to oxidative stress	12/29	296/17913	1.34032923503317e-14	3.11291464836454e-12	7.92440267028383e-13	JUN/TP53/MAPK3/MAPK1/IL6/AKT1/FOS/TNF/IL10/EGFR/MCL1/BCL2	12	geneontology_Biological_Process	0.413793103448276
GO:0031663	lipopolysaccharide-mediated signaling pathway	8/29	55/17913	1.89544159540185e-14	4.06353517414227e-12	1.0344353322274e-12	MAPK3/MAPK1/MAPK14/AKT1/TNF/IL1B/TGFB1/CCL2	8	geneontology_Biological_Process	0.275862068965517
GO:1901214	regulation of neuron death	12/29	313/17913	2.61261131962822e-14	5.20096267700276e-12	1.3239849845334e-12	JUN/TP53/AKT1/FOS/TNF/CREB1/IL10/CASP3/MCL1/BCL2/BCL2L1/CCL2	12	geneontology_Biological_Process	0.413793103448276
GO:0007568	aging	12/29	318/17913	3.15654835605544e-14	5.65157886401056e-12	1.43869626058698e-12	JUN/TP53/MAPK3/MAPK1/MAPK14/AKT1/FOS/CREB1/IL10/CDKN1A/BCL2/TGFB1	12	geneontology_Biological_Process	0.413793103448276
GO:0051090	regulation of DNA-binding transcription factor activity	13/29	429/17913	3.41209915629074e-14	5.65157886401056e-12	1.43869626058698e-12	JUN/MAPK3/MAPK1/MAPK14/IL6/AKT1/FOS/ESR1/TNF/IL10/IL1B/TGFB1/VEGFA	13	geneontology_Biological_Process	0.448275862068966
GO:0018105	peptidyl-serine phosphorylation	11/29	231/17913	3.64509822154144e-14	5.65157886401056e-12	1.43869626058698e-12	MAPK3/MAPK1/MAPK14/IL6/AKT1/TNF/EGFR/BCL2/TGFB1/IFNG/VEGFA	11	geneontology_Biological_Process	0.379310344827586
GO:2000379	positive regulation of reactive oxygen species metabolic process	9/29	101/17913	3.65010475608863e-14	5.65157886401056e-12	1.43869626058698e-12	TP53/MAPK14/AKT1/TNF/CDKN1A/EGFR/IL1B/TGFB1/IFNG	9	geneontology_Biological_Process	0.310344827586207
GO:1904951	positive regulation of establishment of protein localization	13/29	440/17913	4.71982909422011e-14	6.92324404504813e-12	1.76241817701072e-12	TP53/MAPK3/MAPK1/MAPK14/IL6/TNF/IL10/IL2/EGFR/IL1B/BCL2/TGFB1/IFNG	13	geneontology_Biological_Process	0.448275862068966
GO:0038034	signal transduction in absence of ligand	8/29	62/17913	5.22514877873098e-14	6.93451887920155e-12	1.76528835933067e-12	AKT1/TNF/IL2/CASP3/IL1B/MCL1/BCL2/BCL2L1	8	geneontology_Biological_Process	0.275862068965517
GO:0097192	extrinsic apoptotic signaling pathway in absence of ligand	8/29	62/17913	5.22514877873098e-14	6.93451887920155e-12	1.76528835933067e-12	AKT1/TNF/IL2/CASP3/IL1B/MCL1/BCL2/BCL2L1	8	geneontology_Biological_Process	0.275862068965517
GO:0033002	muscle cell proliferation	11/29	243/17913	6.36874815767574e-14	8.06804596156468e-12	2.05384509965237e-12	JUN/MAPK1/MAPK14/IL6/AKT1/STAT1/TNF/IL10/CDKN1A/EGFR/IFNG	11	geneontology_Biological_Process	0.379310344827586
GO:0070997	neuron death	12/29	347/17913	8.92360106614402e-14	1.08130765962363e-11	2.75263483687921e-12	JUN/TP53/AKT1/FOS/TNF/CREB1/IL10/CASP3/MCL1/BCL2/BCL2L1/CCL2	12	geneontology_Biological_Process	0.413793103448276
GO:0018209	peptidyl-serine modification	11/29	252/17913	9.50082570115283e-14	1.10328338454637e-11	2.8085774221829e-12	MAPK3/MAPK1/MAPK14/IL6/AKT1/TNF/EGFR/BCL2/TGFB1/IFNG/VEGFA	11	geneontology_Biological_Process	0.379310344827586
GO:1903708	positive regulation of hemopoiesis	10/29	182/17913	1.54929259107579e-13	1.72715138053129e-11	4.39672929004246e-12	JUN/MAPK14/STAT1/FOS/TNF/CREB1/IL2/IL4/TGFB1/IFNG	10	geneontology_Biological_Process	0.344827586206897
GO:0002694	regulation of leukocyte activation	13/29	492/17913	1.96656299887695e-13	2.10800426071925e-11	5.36624883094358e-12	IL6/AKT1/TNF/IL10/IL2/CASP3/CDKN1A/IL4/IL1B/BCL2/TGFB1/IFNG/CCL2	13	geneontology_Biological_Process	0.448275862068966
GO:0009991	response to extracellular stimulus	13/29	498/17913	2.2949444876278e-13	2.36889269889581e-11	6.03038044702199e-12	JUN/TP53/MAPK3/MAPK1/AKT1/STAT1/FOS/CREB1/CDKN1A/EGFR/IL1B/BCL2/TGFB1	13	geneontology_Biological_Process	0.448275862068966
GO:0022407	regulation of cell-cell adhesion	12/29	389/17913	3.45800502496002e-13	3.44195000162985e-11	8.7620127324175e-12	MAPK14/IL6/AKT1/TNF/IL10/IL2/CASP3/IL4/IL1B/TGFB1/IFNG/CCL2	12	geneontology_Biological_Process	0.413793103448276
GO:0051249	regulation of lymphocyte activation	12/29	401/17913	4.95174707931161e-13	4.64667243885159e-11	1.18288188536475e-11	IL6/AKT1/IL10/IL2/CASP3/CDKN1A/IL4/IL1B/BCL2/TGFB1/IFNG/CCL2	12	geneontology_Biological_Process	0.413793103448276
GO:0051052	regulation of DNA metabolic process	12/29	403/17913	5.25136731213548e-13	4.64667243885159e-11	1.18288188536475e-11	JUN/TP53/MAPK3/MAPK1/IL6/AKT1/IL10/IL2/CDKN1A/IL4/EGFR/TGFB1	12	geneontology_Biological_Process	0.413793103448276
GO:0051222	positive regulation of protein transport	12/29	403/17913	5.25136731213548e-13	4.64667243885159e-11	1.18288188536475e-11	TP53/MAPK3/MAPK1/MAPK14/IL6/TNF/IL10/IL2/EGFR/IL1B/TGFB1/IFNG	12	geneontology_Biological_Process	0.413793103448276
GO:1903037	regulation of leukocyte cell-cell adhesion	11/29	295/17913	5.33525360757986e-13	4.64667243885159e-11	1.18288188536475e-11	IL6/AKT1/TNF/IL10/IL2/CASP3/IL4/IL1B/TGFB1/IFNG/CCL2	11	geneontology_Biological_Process	0.379310344827586
GO:0002700	regulation of production of molecular mediator of immune response	9/29	138/17913	6.45248736639087e-13	5.44941887579738e-11	1.38723332853188e-11	MAPK3/MAPK14/IL6/TNF/IL10/IL2/IL4/IL1B/TGFB1	9	geneontology_Biological_Process	0.310344827586207
GO:0051384	response to glucocorticoid	9/29	139/17913	6.89222545907536e-13	5.64959775130677e-11	1.43819193789994e-11	IL6/FOS/TNF/IL10/CASP3/CDKN1A/EGFR/BCL2/TGFB1	9	geneontology_Biological_Process	0.310344827586207
GO:0097191	extrinsic apoptotic signaling pathway	10/29	213/17913	7.52083851071958e-13	5.94164529914297e-11	1.51253712976502e-11	AKT1/TNF/IL2/CASP3/IL1B/MCL1/BCL2/TGFB1/IFNG/BCL2L1	10	geneontology_Biological_Process	0.344827586206897
GO:0002696	positive regulation of leukocyte activation	11/29	305/17913	7.67489166735367e-13	5.94164529914297e-11	1.51253712976502e-11	IL6/AKT1/IL10/IL2/CDKN1A/IL4/IL1B/BCL2/TGFB1/IFNG/CCL2	11	geneontology_Biological_Process	0.379310344827586
GO:0033138	positive regulation of peptidyl-serine phosphorylation	8/29	86/17913	7.99672915157213e-13	6.02348220146798e-11	1.53336997102692e-11	IL6/AKT1/TNF/EGFR/BCL2/TGFB1/IFNG/VEGFA	8	geneontology_Biological_Process	0.275862068965517
GO:0048732	gland development	12/29	422/17913	9.04171302584574e-13	6.63138268500844e-11	1.68812038211081e-11	JUN/MAPK3/MAPK1/AKT1/ESR1/TNF/CREB1/IL10/EGFR/BCL2/TGFB1/VEGFA	12	geneontology_Biological_Process	0.413793103448276
GO:0050673	epithelial cell proliferation	12/29	425/17913	9.82860576631732e-13	7.02367288992984e-11	1.78798388299538e-11	JUN/MAPK1/AKT1/STAT1/ESR1/TNF/IL10/SP1/EGFR/TGFB1/CCL2/VEGFA	12	geneontology_Biological_Process	0.413793103448276
GO:0045639	positive regulation of myeloid cell differentiation	8/29	90/17913	1.16335831135361e-12	8.1056990343563e-11	2.06343026803246e-11	JUN/MAPK14/STAT1/FOS/TNF/CREB1/TGFB1/IFNG	8	geneontology_Biological_Process	0.275862068965517
GO:0050867	positive regulation of cell activation	11/29	319/17913	1.2511358474475e-12	8.50467221179555e-11	2.16499502228399e-11	IL6/AKT1/IL10/IL2/CDKN1A/IL4/IL1B/BCL2/TGFB1/IFNG/CCL2	11	geneontology_Biological_Process	0.379310344827586
GO:0071496	cellular response to external stimulus	11/29	320/17913	1.29446371613687e-12	8.58969137350825e-11	2.18663795658209e-11	JUN/TP53/MAPK3/MAPK1/AKT1/FOS/CDKN1A/EGFR/IL1B/BCL2/TGFB1	11	geneontology_Biological_Process	0.379310344827586
GO:0042110	T cell activation	12/29	443/17913	1.60127741266034e-12	1.03785119746148e-10	2.64200973349588e-11	TP53/IL6/AKT1/IL10/IL2/CASP3/IL4/IL1B/BCL2/TGFB1/IFNG/CCL2	12	geneontology_Biological_Process	0.413793103448276
GO:0007159	leukocyte cell-cell adhesion	11/29	328/17913	1.69302734562175e-12	1.07237891187451e-10	2.72990533719871e-11	IL6/AKT1/TNF/IL10/IL2/CASP3/IL4/IL1B/TGFB1/IFNG/CCL2	11	geneontology_Biological_Process	0.379310344827586
GO:0001819	positive regulation of cytokine production	12/29	446/17913	1.73347276750656e-12	1.0735974673424e-10	2.73300735742555e-11	MAPK3/MAPK14/IL6/STAT1/TNF/CREB1/IL10/IL2/IL4/IL1B/TGFB1/IFNG	12	geneontology_Biological_Process	0.413793103448276
GO:0031960	response to corticosteroid	9/29	155/17913	1.85893009800712e-12	1.1262691702491e-10	2.86709127244119e-11	IL6/FOS/TNF/IL10/CASP3/CDKN1A/EGFR/BCL2/TGFB1	9	geneontology_Biological_Process	0.310344827586207
GO:0031667	response to nutrient levels	12/29	466/17913	2.90106588883136e-12	1.69487652954526e-10	4.31456869644216e-11	JUN/TP53/MAPK3/MAPK1/AKT1/STAT1/CREB1/CDKN1A/EGFR/IL1B/BCL2/TGFB1	12	geneontology_Biological_Process	0.413793103448276
GO:0046651	lymphocyte proliferation	10/29	244/17913	2.91905537919529e-12	1.69487652954526e-10	4.31456869644216e-11	TP53/IL6/IL10/IL2/CASP3/CDKN1A/IL4/IL1B/BCL2/TGFB1	10	geneontology_Biological_Process	0.344827586206897
GO:0002367	cytokine production involved in immune response	8/29	101/17913	2.99834900807063e-12	1.70538748683527e-10	4.34132595368336e-11	MAPK3/MAPK14/IL6/TNF/IL10/IL4/IL1B/TGFB1	8	geneontology_Biological_Process	0.275862068965517
GO:0032943	mononuclear cell proliferation	10/29	246/17913	3.16604231065028e-12	1.76475198395647e-10	4.49244740500692e-11	TP53/IL6/IL10/IL2/CASP3/CDKN1A/IL4/IL1B/BCL2/TGFB1	10	geneontology_Biological_Process	0.344827586206897
GO:0034614	cellular response to reactive oxygen species	9/29	165/17913	3.27775925714498e-12	1.7911990293457e-10	4.55977242376825e-11	JUN/MAPK3/MAPK1/IL6/AKT1/FOS/TNF/IL10/EGFR	9	geneontology_Biological_Process	0.310344827586207
GO:0022409	positive regulation of cell-cell adhesion	10/29	251/17913	3.86731236955764e-12	2.07273068729945e-10	5.27645452850576e-11	IL6/AKT1/TNF/IL10/IL2/IL4/IL1B/TGFB1/IFNG/CCL2	10	geneontology_Biological_Process	0.344827586206897
GO:0071900	regulation of protein serine/threonine kinase activity	12/29	479/17913	4.00488706392116e-12	2.1059660843676e-10	5.36106033978722e-11	MAPK3/MAPK1/MAPK14/AKT1/TNF/CASP3/CDKN1A/EGFR/IL1B/TGFB1/IFNG/VEGFA	12	geneontology_Biological_Process	0.413793103448276
GO:0048660	regulation of smooth muscle cell proliferation	9/29	172/17913	4.77409494957699e-12	2.46396344897612e-10	6.27239765305047e-11	JUN/IL6/AKT1/STAT1/TNF/IL10/CDKN1A/EGFR/IFNG	9	geneontology_Biological_Process	0.310344827586207
GO:0051251	positive regulation of lymphocyte activation	10/29	258/17913	5.08241573668551e-12	2.57539866511682e-10	6.55607312253786e-11	IL6/AKT1/IL2/CDKN1A/IL4/IL1B/BCL2/TGFB1/IFNG/CCL2	10	geneontology_Biological_Process	0.344827586206897
GO:0048659	smooth muscle cell proliferation	9/29	174/17913	5.30003958261667e-12	2.63771612799155e-10	6.71471180203691e-11	JUN/IL6/AKT1/STAT1/TNF/IL10/CDKN1A/EGFR/IFNG	9	geneontology_Biological_Process	0.310344827586207
GO:0050864	regulation of B cell activation	8/29	110/17913	6.02151535158694e-12	2.94420408506541e-10	7.49492400179058e-11	IL6/IL10/IL2/CASP3/CDKN1A/IL4/BCL2/TGFB1	8	geneontology_Biological_Process	0.275862068965517
GO:0070661	leukocyte proliferation	10/29	270/17913	7.97764293227485e-12	3.83339497452586e-10	9.75849607323639e-11	TP53/IL6/IL10/IL2/CASP3/CDKN1A/IL4/IL1B/BCL2/TGFB1	10	geneontology_Biological_Process	0.344827586206897
GO:1903532	positive regulation of secretion by cell	11/29	381/17913	8.57049383182314e-12	4.04846886598154e-10	1.03059997192664e-10	MAPK3/MAPK14/IL6/TNF/CREB1/IL10/IL2/EGFR/IL1B/TGFB1/IFNG	11	geneontology_Biological_Process	0.379310344827586
GO:0071276	cellular response to cadmium ion	6/29	32/17913	9.12380967869753e-12	4.10129960879517e-10	1.04404884948084e-10	JUN/MAPK3/MAPK1/AKT1/FOS/EGFR	6	geneontology_Biological_Process	0.206896551724138
GO:1901099	negative regulation of signal transduction in absence of ligand	6/29	32/17913	9.12380967869753e-12	4.10129960879517e-10	1.04404884948084e-10	AKT1/TNF/IL1B/MCL1/BCL2/BCL2L1	6	geneontology_Biological_Process	0.206896551724138
GO:2001240	negative regulation of extrinsic apoptotic signaling pathway in absence of ligand	6/29	32/17913	9.12380967869753e-12	4.10129960879517e-10	1.04404884948084e-10	AKT1/TNF/IL1B/MCL1/BCL2/BCL2L1	6	geneontology_Biological_Process	0.206896551724138
GO:0002685	regulation of leukocyte migration	9/29	186/17913	9.67520863491269e-12	4.28012801039709e-10	1.08957236757413e-10	MAPK3/MAPK14/IL6/AKT1/TNF/CXCL8/TGFB1/CCL2/VEGFA	9	geneontology_Biological_Process	0.310344827586207
GO:0045785	positive regulation of cell adhesion	11/29	388/17913	1.04299254138258e-11	4.54190658255197e-10	1.15621212646688e-10	IL6/AKT1/TNF/IL10/IL2/IL4/IL1B/TGFB1/IFNG/CCL2/VEGFA	11	geneontology_Biological_Process	0.379310344827586
GO:0033135	regulation of peptidyl-serine phosphorylation	8/29	119/17913	1.1418057017956e-11	4.8957115244682e-10	1.24627861216232e-10	IL6/AKT1/TNF/EGFR/BCL2/TGFB1/IFNG/VEGFA	8	geneontology_Biological_Process	0.275862068965517
GO:0002440	production of molecular mediator of immune response	9/29	191/17913	1.22860687226251e-11	5.18807174696306e-10	1.32070340016736e-10	MAPK3/MAPK14/IL6/TNF/IL10/IL2/IL4/IL1B/TGFB1	9	geneontology_Biological_Process	0.310344827586207
GO:0042063	gliogenesis	10/29	285/17913	1.36214531769957e-11	5.66611791108763e-10	1.44239739847527e-10	MAPK3/MAPK1/IL6/AKT1/TNF/CREB1/EGFR/IL1B/TGFB1/CCL2	10	geneontology_Biological_Process	0.344827586206897
GO:0009895	negative regulation of catabolic process	10/29	288/17913	1.51062794865858e-11	6.19135307781098e-10	1.57610408265617e-10	TP53/MAPK14/AKT1/TNF/IL10/EGFR/IL1B/MCL1/BCL2/NOS2	10	geneontology_Biological_Process	0.344827586206897
GO:0002699	positive regulation of immune effector process	9/29	198/17913	1.69824184587956e-11	6.85942032531351e-10	1.74617086822703e-10	MAPK3/MAPK14/IL6/TNF/IL2/IL4/IL1B/TGFB1/IFNG	9	geneontology_Biological_Process	0.310344827586207
GO:0050670	regulation of lymphocyte proliferation	9/29	199/17913	1.77688290965834e-11	7.00036148427678e-10	1.78204960640664e-10	IL6/IL10/IL2/CASP3/CDKN1A/IL4/IL1B/BCL2/TGFB1	9	geneontology_Biological_Process	0.310344827586207
GO:0043900	regulation of multi-organism process	11/29	408/17913	1.7919063249219e-11	7.00036148427678e-10	1.78204960640664e-10	JUN/MAPK3/STAT1/TNF/IL10/SP1/IL1B/BCL2/CXCL8/IFNG/NOS2	11	geneontology_Biological_Process	0.379310344827586
GO:0051047	positive regulation of secretion	11/29	409/17913	1.83970340143596e-11	7.00036148427678e-10	1.78204960640664e-10	MAPK3/MAPK14/IL6/TNF/CREB1/IL10/IL2/EGFR/IL1B/TGFB1/IFNG	11	geneontology_Biological_Process	0.379310344827586
GO:0009612	response to mechanical stimulus	9/29	200/17913	1.85872533131138e-11	7.00036148427678e-10	1.78204960640664e-10	JUN/MAPK3/MAPK14/AKT1/STAT1/FOS/EGFR/IL1B/TGFB1	9	geneontology_Biological_Process	0.310344827586207
GO:0032944	regulation of mononuclear cell proliferation	9/29	200/17913	1.85872533131138e-11	7.00036148427678e-10	1.78204960640664e-10	IL6/IL10/IL2/CASP3/CDKN1A/IL4/IL1B/BCL2/TGFB1	9	geneontology_Biological_Process	0.310344827586207
GO:0030099	myeloid cell differentiation	11/29	411/17913	1.93876465382862e-11	7.1284184244304e-10	1.81464846866696e-10	JUN/MAPK14/STAT1/FOS/TNF/CREB1/CASP3/IL4/TGFB1/IFNG/VEGFA	11	geneontology_Biological_Process	0.379310344827586
GO:0002573	myeloid leukocyte differentiation	9/29	201/17913	1.94388159403197e-11	7.1284184244304e-10	1.81464846866696e-10	JUN/MAPK14/FOS/TNF/CREB1/IL4/TGFB1/IFNG/VEGFA	9	geneontology_Biological_Process	0.310344827586207
GO:0150076	neuroinflammatory response	7/29	76/17913	2.70098655655059e-11	9.77616822481361e-10	2.48867387438837e-10	JUN/IL6/TNF/IL4/EGFR/IL1B/IFNG	7	geneontology_Biological_Process	0.241379310344828
GO:0050863	regulation of T cell activation	10/29	307/17913	2.83689692374044e-11	1.00517833146426e-09	2.55883593151252e-10	IL6/AKT1/IL10/IL2/CASP3/IL4/IL1B/TGFB1/IFNG/CCL2	10	geneontology_Biological_Process	0.344827586206897
GO:0048608	reproductive structure development	11/29	426/17913	2.84926760623168e-11	1.00517833146426e-09	2.55883593151252e-10	MAPK3/MAPK1/MAPK14/AKT1/ESR1/IL10/CASP3/EGFR/BCL2/BCL2L1/VEGFA	11	geneontology_Biological_Process	0.379310344827586
GO:0061458	reproductive system development	11/29	429/17913	3.07207824894991e-11	1.06109666440156e-09	2.70118464225502e-10	MAPK3/MAPK1/MAPK14/AKT1/ESR1/IL10/CASP3/EGFR/BCL2/BCL2L1/VEGFA	11	geneontology_Biological_Process	0.379310344827586
GO:0071214	cellular response to abiotic stimulus	10/29	310/17913	3.12199233874875e-11	1.06109666440156e-09	2.70118464225502e-10	TP53/MAPK3/MAPK14/AKT1/CASP3/CDKN1A/EGFR/IL1B/TGFB1/BCL2L1	10	geneontology_Biological_Process	0.344827586206897
GO:0104004	cellular response to environmental stimulus	10/29	310/17913	3.12199233874875e-11	1.06109666440156e-09	2.70118464225502e-10	TP53/MAPK3/MAPK14/AKT1/CASP3/CDKN1A/EGFR/IL1B/TGFB1/BCL2L1	10	geneontology_Biological_Process	0.344827586206897
GO:0070663	regulation of leukocyte proliferation	9/29	214/17913	3.41006760765078e-11	1.13141171696699e-09	2.88018241548449e-10	IL6/IL10/IL2/CASP3/CDKN1A/IL4/IL1B/BCL2/TGFB1	9	geneontology_Biological_Process	0.310344827586207
GO:1903039	positive regulation of leukocyte cell-cell adhesion	9/29	214/17913	3.41006760765078e-11	1.13141171696699e-09	2.88018241548449e-10	IL6/AKT1/TNF/IL2/IL4/IL1B/TGFB1/IFNG/CCL2	9	geneontology_Biological_Process	0.310344827586207
GO:0042113	B cell activation	9/29	215/17913	3.55544316538278e-11	1.15545780392808e-09	2.94139542555672e-10	TP53/IL6/IL10/IL2/CASP3/CDKN1A/IL4/BCL2/TGFB1	9	geneontology_Biological_Process	0.310344827586207
GO:0009314	response to radiation	11/29	435/17913	3.56546003364962e-11	1.15545780392808e-09	2.94139542555672e-10	TP53/MAPK14/AKT1/FOS/CREB1/CASP3/CDKN1A/EGFR/BCL2/TGFB1/BCL2L1	11	geneontology_Biological_Process	0.379310344827586
GO:0032103	positive regulation of response to external stimulus	10/29	315/17913	3.65441884824e-11	1.17067417586723e-09	2.98013103897611e-10	MAPK3/MAPK14/IL6/TNF/IL2/EGFR/IL1B/CXCL8/TGFB1/VEGFA	10	geneontology_Biological_Process	0.344827586206897
GO:1903829	positive regulation of cellular protein localization	10/29	318/17913	4.01150116454596e-11	1.27046065290791e-09	3.23415285275595e-10	TP53/MAPK1/MAPK14/AKT1/TNF/EGFR/IL1B/BCL2/TGFB1/IFNG	10	geneontology_Biological_Process	0.344827586206897
GO:0002697	regulation of immune effector process	11/29	441/17913	4.12921822728975e-11	1.29304844937714e-09	3.29165356025227e-10	MAPK3/MAPK14/IL6/STAT1/TNF/IL10/IL2/IL4/IL1B/TGFB1/IFNG	11	geneontology_Biological_Process	0.379310344827586
GO:0007259	JAK-STAT cascade	8/29	140/17913	4.25241765815235e-11	1.31683200147451e-09	3.35219824747916e-10	IL6/STAT1/TNF/IL10/IL2/IL4/IFNG/CCL2	8	geneontology_Biological_Process	0.275862068965517
GO:0071902	positive regulation of protein serine/threonine kinase activity	10/29	322/17913	4.53600941397971e-11	1.38921519085291e-09	3.53646078082397e-10	MAPK3/MAPK1/MAPK14/AKT1/TNF/EGFR/IL1B/TGFB1/IFNG/VEGFA	10	geneontology_Biological_Process	0.344827586206897
GO:0051054	positive regulation of DNA metabolic process	9/29	222/17913	4.73581431778487e-11	1.43464288083331e-09	3.65210394758238e-10	JUN/MAPK3/MAPK1/IL6/AKT1/IL2/IL4/EGFR/TGFB1	9	geneontology_Biological_Process	0.310344827586207
GO:1902107	positive regulation of leukocyte differentiation	8/29	143/17913	5.04456197619377e-11	1.50943681888674e-09	3.84250341219444e-10	JUN/FOS/TNF/CREB1/IL2/IL4/TGFB1/IFNG	8	geneontology_Biological_Process	0.275862068965517
GO:0002718	regulation of cytokine production involved in immune response	7/29	83/17913	5.09103196897573e-11	1.50943681888674e-09	3.84250341219444e-10	MAPK3/MAPK14/IL6/TNF/IL10/IL1B/TGFB1	7	geneontology_Biological_Process	0.241379310344828
GO:0050708	regulation of protein secretion	11/29	456/17913	5.90662797594209e-11	1.73281812304743e-09	4.41115485405537e-10	MAPK3/MAPK14/IL6/TNF/IL10/IL2/EGFR/IL1B/TGFB1/IFNG/NOS2	11	geneontology_Biological_Process	0.379310344827586
GO:2001239	regulation of extrinsic apoptotic signaling pathway in absence of ligand	6/29	43/17913	6.06410618412243e-11	1.76048582657804e-09	4.48158724572206e-10	AKT1/TNF/IL1B/MCL1/BCL2/BCL2L1	6	geneontology_Biological_Process	0.206896551724138
GO:0048145	regulation of fibroblast proliferation	7/29	86/17913	6.567273983223e-11	1.88690645270541e-09	4.8034103794816e-10	JUN/TP53/ESR1/CREB1/CDKN1A/EGFR/TGFB1	7	geneontology_Biological_Process	0.241379310344828
GO:0048144	fibroblast proliferation	7/29	87/17913	7.13421280461815e-11	2.02888276392559e-09	5.16483290044322e-10	JUN/TP53/ESR1/CREB1/CDKN1A/EGFR/TGFB1	7	geneontology_Biological_Process	0.241379310344828
GO:0097696	STAT cascade	8/29	150/17913	7.40947138587296e-11	2.0858784598412e-09	5.30992420423006e-10	IL6/STAT1/TNF/IL10/IL2/IL4/IFNG/CCL2	8	geneontology_Biological_Process	0.275862068965517
GO:0018108	peptidyl-tyrosine phosphorylation	10/29	346/17913	9.18259362989443e-11	2.55918884465158e-09	6.51480853320931e-10	TP53/MAPK3/IL6/TNF/IL2/IL4/EGFR/TGFB1/IFNG/VEGFA	10	geneontology_Biological_Process	0.344827586206897
GO:0048872	homeostasis of number of cells	9/29	241/17913	9.85572353742456e-11	2.7195942078022e-09	6.92314503827426e-10	MAPK14/IL6/AKT1/STAT1/IL2/CASP3/BCL2/TGFB1/VEGFA	9	geneontology_Biological_Process	0.310344827586207
GO:0018212	peptidyl-tyrosine modification	10/29	349/17913	9.9925690909888e-11	2.73032255456723e-09	6.95045569383535e-10	TP53/MAPK3/IL6/TNF/IL2/IL4/EGFR/TGFB1/IFNG/VEGFA	10	geneontology_Biological_Process	0.344827586206897
GO:0002791	regulation of peptide secretion	11/29	483/17913	1.09163704440777e-10	2.9537790706451e-09	7.51929859919097e-10	MAPK3/MAPK14/IL6/TNF/IL10/IL2/EGFR/IL1B/TGFB1/IFNG/NOS2	11	geneontology_Biological_Process	0.379310344827586
GO:0050730	regulation of peptidyl-tyrosine phosphorylation	9/29	245/17913	1.14117023461436e-10	3.0502616517742e-09	7.76490983814254e-10	TP53/IL6/TNF/IL2/IL4/EGFR/TGFB1/IFNG/VEGFA	9	geneontology_Biological_Process	0.310344827586207
GO:0002702	positive regulation of production of molecular mediator of immune response	7/29	93/17913	1.14918361476961e-10	3.0502616517742e-09	7.76490983814254e-10	MAPK3/MAPK14/IL6/IL2/IL4/IL1B/TGFB1	7	geneontology_Biological_Process	0.241379310344828
GO:0030316	osteoclast differentiation	7/29	94/17913	1.2403080978932e-10	3.26107421587579e-09	8.30156562045694e-10	MAPK14/FOS/TNF/CREB1/IL4/TGFB1/IFNG	7	geneontology_Biological_Process	0.241379310344828
GO:0045637	regulation of myeloid cell differentiation	9/29	250/17913	1.3658929491097e-10	3.55770434501751e-09	9.05668320413121e-10	JUN/MAPK14/STAT1/FOS/TNF/CREB1/IL4/TGFB1/IFNG	9	geneontology_Biological_Process	0.310344827586207
GO:0035690	cellular response to drug	10/29	362/17913	1.42897513215485e-10	3.68754971603293e-09	9.38722455236226e-10	TP53/MAPK3/MAPK1/IL6/TNF/IL10/EGFR/IL1B/TGFB1/NOS2	10	geneontology_Biological_Process	0.344827586206897
GO:0050714	positive regulation of protein secretion	9/29	256/17913	1.68643129644505e-10	4.31200369100217e-09	1.09768681197872e-09	MAPK3/MAPK14/IL6/TNF/IL10/IL2/EGFR/IL1B/TGFB1	9	geneontology_Biological_Process	0.310344827586207
GO:0050678	regulation of epithelial cell proliferation	10/29	369/17913	1.72291995442871e-10	4.36525264817529e-09	1.11124215242579e-09	JUN/AKT1/STAT1/TNF/IL10/SP1/EGFR/TGFB1/CCL2/VEGFA	10	geneontology_Biological_Process	0.344827586206897
GO:0048545	response to steroid hormone	10/29	375/17913	2.01660772563941e-10	5.02694264167834e-09	1.27968550997723e-09	IL6/FOS/ESR1/TNF/IL10/CASP3/CDKN1A/EGFR/BCL2/TGFB1	10	geneontology_Biological_Process	0.344827586206897
GO:0001936	regulation of endothelial cell proliferation	8/29	170/17913	2.02015635402933e-10	5.02694264167834e-09	1.27968550997723e-09	JUN/AKT1/STAT1/TNF/IL10/SP1/CCL2/VEGFA	8	geneontology_Biological_Process	0.275862068965517
GO:0048661	positive regulation of smooth muscle cell proliferation	7/29	101/17913	2.06844527210889e-10	5.10155484368804e-09	1.29867919273535e-09	JUN/IL6/AKT1/STAT1/TNF/IL10/EGFR	7	geneontology_Biological_Process	0.241379310344828
GO:0006606	protein import into nucleus	7/29	103/17913	2.37765830663513e-10	5.81274886016852e-09	1.47972456017736e-09	TP53/MAPK1/MAPK14/AKT1/CDKN1A/TGFB1/IFNG	7	geneontology_Biological_Process	0.241379310344828
GO:0002763	positive regulation of myeloid leukocyte differentiation	6/29	54/17913	2.53803874803161e-10	6.15088173109922e-09	1.56580147933483e-09	JUN/FOS/TNF/CREB1/TGFB1/IFNG	6	geneontology_Biological_Process	0.206896551724138
GO:0042098	T cell proliferation	8/29	177/17913	2.7880621172397e-10	6.6985595868509e-09	1.70522129493608e-09	TP53/IL6/IL10/IL2/CASP3/IL4/IL1B/TGFB1	8	geneontology_Biological_Process	0.275862068965517
GO:0002793	positive regulation of peptide secretion	9/29	275/17913	3.18220845774391e-10	7.58018373652331e-09	1.9296522721722e-09	MAPK3/MAPK14/IL6/TNF/IL10/IL2/EGFR/IL1B/TGFB1	9	geneontology_Biological_Process	0.310344827586207
GO:1905475	regulation of protein localization to membrane	8/29	181/17913	3.33183488719091e-10	7.86934222932294e-09	2.003262010675e-09	TP53/AKT1/TNF/EGFR/BCL2/TGFB1/IFNG/BCL2L1	8	geneontology_Biological_Process	0.275862068965517
GO:0030888	regulation of B cell proliferation	6/29	57/17913	3.5542713349754e-10	8.25479517548037e-09	2.10138498225739e-09	IL10/IL2/CASP3/CDKN1A/IL4/BCL2	6	geneontology_Biological_Process	0.206896551724138
GO:0046686	response to cadmium ion	6/29	57/17913	3.5542713349754e-10	8.25479517548037e-09	2.10138498225739e-09	JUN/MAPK3/MAPK1/AKT1/FOS/EGFR	6	geneontology_Biological_Process	0.206896551724138
GO:0050731	positive regulation of peptidyl-tyrosine phosphorylation	8/29	184/17913	3.79800910526811e-10	8.74797634411753e-09	2.22693182857826e-09	TP53/IL6/TNF/IL2/IL4/TGFB1/IFNG/VEGFA	8	geneontology_Biological_Process	0.275862068965517
GO:0001935	endothelial cell proliferation	8/29	185/17913	3.9655049357819e-10	9.05890348854439e-09	2.30608311192149e-09	JUN/AKT1/STAT1/TNF/IL10/SP1/CCL2/VEGFA	8	geneontology_Biological_Process	0.275862068965517
GO:0034612	response to tumor necrosis factor	9/29	284/17913	4.23120135920667e-10	9.58728307976341e-09	2.44059025768532e-09	MAPK3/MAPK1/MAPK14/AKT1/STAT1/TNF/CASP3/CXCL8/CCL2	9	geneontology_Biological_Process	0.310344827586207
GO:0061900	glial cell activation	6/29	59/17913	4.40345256587808e-10	9.89711475895339e-09	2.51946267351598e-09	JUN/IL6/TNF/EGFR/IL1B/IFNG	6	geneontology_Biological_Process	0.206896551724138
GO:0046824	positive regulation of nucleocytoplasmic transport	6/29	60/17913	4.88733119466771e-10	1.08967936316311e-08	2.77394629491034e-09	TP53/MAPK1/MAPK14/IL1B/TGFB1/IFNG	6	geneontology_Biological_Process	0.206896551724138
GO:0048568	embryonic organ development	10/29	413/17913	5.15807054655179e-10	1.14091608041586e-08	2.90437723339675e-09	TP53/MAPK3/MAPK1/AKT1/TNF/IL10/EGFR/CXCL8/TGFB1/VEGFA	10	geneontology_Biological_Process	0.344827586206897
GO:0007565	female pregnancy	8/29	193/17913	5.55307714457015e-10	1.21861622062339e-08	3.10217488225469e-09	MAPK3/MAPK1/AKT1/FOS/ESR1/IL1B/BCL2/TGFB1	8	geneontology_Biological_Process	0.275862068965517
GO:0002761	regulation of myeloid leukocyte differentiation	7/29	117/17913	5.86221729715e-10	1.27640621930914e-08	3.24928820582163e-09	JUN/FOS/TNF/CREB1/IL4/TGFB1/IFNG	7	geneontology_Biological_Process	0.241379310344828
GO:0002637	regulation of immunoglobulin production	6/29	62/17913	5.9880367414942e-10	1.29369444949956e-08	3.29329805284952e-09	IL6/TNF/IL10/IL2/IL4/TGFB1	6	geneontology_Biological_Process	0.206896551724138
GO:0050870	positive regulation of T cell activation	8/29	198/17913	6.80375963621325e-10	1.45862139277895e-08	3.71314493506699e-09	IL6/AKT1/IL2/IL4/IL1B/TGFB1/IFNG/CCL2	8	geneontology_Biological_Process	0.275862068965517
GO:1905477	positive regulation of protein localization to membrane	7/29	120/17913	7.00884103970406e-10	1.4911175555462e-08	3.79586891182044e-09	TP53/AKT1/TNF/EGFR/BCL2/TGFB1/IFNG	7	geneontology_Biological_Process	0.241379310344828
GO:0002687	positive regulation of leukocyte migration	7/29	121/17913	7.4311816103063e-10	1.56899266272149e-08	3.994111965986e-09	MAPK3/MAPK14/IL6/TNF/CXCL8/TGFB1/VEGFA	7	geneontology_Biological_Process	0.241379310344828
GO:0032147	activation of protein kinase activity	9/29	303/17913	7.49387646839588e-10	1.57033336221198e-08	3.99752492259504e-09	MAPK3/MAPK1/MAPK14/AKT1/TNF/IL4/EGFR/IL1B/VEGFA	9	geneontology_Biological_Process	0.310344827586207
GO:0045930	negative regulation of mitotic cell cycle	9/29	308/17913	8.6561005198539e-10	1.80033971259946e-08	4.58304143784881e-09	TP53/TNF/IL10/CDKN1A/EGFR/BCL2/TGFB1/BCL2L1/CCL2	9	geneontology_Biological_Process	0.310344827586207
GO:0051170	import into nucleus	7/29	125/17913	9.34448238239778e-10	1.92911647405501e-08	4.91086247620749e-09	TP53/MAPK1/MAPK14/AKT1/CDKN1A/TGFB1/IFNG	7	geneontology_Biological_Process	0.241379310344828
GO:0010506	regulation of autophagy	9/29	314/17913	1.02581120376957e-09	2.10215869478367e-08	5.35136804443259e-09	TP53/MAPK3/AKT1/IL10/CASP3/IL4/MCL1/BCL2/IFNG	9	geneontology_Biological_Process	0.310344827586207
GO:0071674	mononuclear cell migration	6/29	68/17913	1.0591163978612e-09	2.15456744586801e-08	5.48478257517059e-09	MAPK3/MAPK14/IL6/TNF/TGFB1/CCL2	6	geneontology_Biological_Process	0.206896551724138
GO:1902895	positive regulation of pri-miRNA transcription by RNA polymerase II	5/29	30/17913	1.07135239250846e-09	2.16366602747904e-08	5.50794441304882e-09	JUN/TP53/FOS/IL10/TGFB1	5	geneontology_Biological_Process	0.172413793103448
GO:0043523	regulation of neuron apoptotic process	8/29	210/17913	1.0846864601755e-09	2.17483537015045e-08	5.53637769146755e-09	JUN/TP53/TNF/CASP3/MCL1/BCL2/BCL2L1/CCL2	8	geneontology_Biological_Process	0.275862068965517
GO:0010001	glial cell differentiation	8/29	212/17913	1.16918571857158e-09	2.32751471261357e-08	5.92504642343793e-09	MAPK3/MAPK1/IL6/AKT1/TNF/EGFR/IL1B/TGFB1	8	geneontology_Biological_Process	0.275862068965517
GO:0050871	positive regulation of B cell activation	6/29	70/17913	1.26593667469944e-09	2.50224504424633e-08	6.36984933742009e-09	IL6/IL2/CDKN1A/IL4/BCL2/TGFB1	6	geneontology_Biological_Process	0.206896551724138
GO:0042100	B cell proliferation	6/29	71/17913	1.3812675104396e-09	2.71098067013745e-08	6.90121795430906e-09	IL10/IL2/CASP3/CDKN1A/IL4/BCL2	6	geneontology_Biological_Process	0.206896551724138
GO:0046677	response to antibiotic	9/29	328/17913	1.50499596478247e-09	2.93316346422988e-08	7.46681840458876e-09	JUN/TP53/IL6/STAT1/IL10/IL2/CASP3/BCL2/BCL2L1	9	geneontology_Biological_Process	0.310344827586207
GO:0002822	regulation of adaptive immune response based on somatic recombination of immune receptors built from immunoglobulin superfamily domains	7/29	135/17913	1.60480976008639e-09	3.10597555650053e-08	7.90673814545487e-09	IL6/TNF/IL10/IL2/IL4/IL1B/TGFB1	7	geneontology_Biological_Process	0.241379310344828
GO:0002706	regulation of lymphocyte mediated immunity	7/29	136/17913	1.69006603967322e-09	3.23169953794766e-08	8.22678786311154e-09	IL6/TNF/IL10/IL2/IL4/IL1B/TGFB1	7	geneontology_Biological_Process	0.241379310344828
GO:0050900	leukocyte migration	10/29	467/17913	1.69296064779461e-09	3.23169953794766e-08	8.22678786311154e-09	MAPK3/MAPK14/IL6/AKT1/TNF/IL10/CXCL8/TGFB1/CCL2/VEGFA	10	geneontology_Biological_Process	0.344827586206897
GO:1903706	regulation of hemopoiesis	10/29	468/17913	1.72822259965309e-09	3.27656896954636e-08	8.34100989735898e-09	JUN/MAPK14/STAT1/FOS/TNF/CREB1/IL2/IL4/TGFB1/IFNG	10	geneontology_Biological_Process	0.344827586206897
GO:0010038	response to metal ion	9/29	335/17913	1.81129573124765e-09	3.41086567769405e-08	8.68288280839912e-09	JUN/MAPK3/MAPK1/AKT1/FOS/CREB1/CASP3/EGFR/BCL2	9	geneontology_Biological_Process	0.310344827586207
GO:0044706	multi-multicellular organism process	8/29	225/17913	1.87117221721028e-09	3.49997112037923e-08	8.90971440762791e-09	MAPK3/MAPK1/AKT1/FOS/ESR1/IL1B/BCL2/TGFB1	8	geneontology_Biological_Process	0.275862068965517
GO:0017038	protein import	7/29	140/17913	2.07075860274785e-09	3.8474694839055e-08	9.79432490001438e-09	TP53/MAPK1/MAPK14/AKT1/CDKN1A/TGFB1/IFNG	7	geneontology_Biological_Process	0.241379310344828
GO:0006809	nitric oxide biosynthetic process	6/29	76/17913	2.09685730998752e-09	3.87015981651339e-08	9.85208662901072e-09	AKT1/TNF/IL10/IL1B/IFNG/NOS2	6	geneontology_Biological_Process	0.206896551724138
GO:0050727	regulation of inflammatory response	10/29	479/17913	2.1615432344862e-09	3.96330328586384e-08	1.0089197645732e-08	MAPK14/IL6/ESR1/TNF/IL10/IL2/IL4/EGFR/IL1B/NOS2	10	geneontology_Biological_Process	0.344827586206897
GO:0098542	defense response to other organism	10/29	481/17913	2.24996570094305e-09	4.09846693367861e-08	1.04332774849372e-08	MAPK3/IL6/STAT1/TNF/IL10/IL1B/BCL2/TGFB1/IFNG/NOS2	10	geneontology_Biological_Process	0.344827586206897
GO:0048708	astrocyte differentiation	6/29	77/17913	2.27154844832365e-09	4.11091267888183e-08	1.04649600421746e-08	MAPK3/MAPK1/IL6/TNF/EGFR/IL1B	6	geneontology_Biological_Process	0.206896551724138
GO:0010212	response to ionizing radiation	7/29	144/17913	2.52209074073106e-09	4.5348818673661e-08	1.15442387725143e-08	TP53/MAPK14/CASP3/CDKN1A/BCL2/TGFB1/BCL2L1	7	geneontology_Biological_Process	0.241379310344828
GO:0051402	neuron apoptotic process	8/29	238/17913	2.91305630445874e-09	5.20428712854264e-08	1.32483127476734e-08	JUN/TP53/TNF/CASP3/MCL1/BCL2/BCL2L1/CCL2	8	geneontology_Biological_Process	0.275862068965517
GO:0031334	positive regulation of protein complex assembly	8/29	239/17913	3.01077238699707e-09	5.34460040927442e-08	1.36055017689308e-08	JUN/TP53/ESR1/TNF/CREB1/TGFB1/IFNG/VEGFA	8	geneontology_Biological_Process	0.275862068965517
GO:0046209	nitric oxide metabolic process	6/29	81/17913	3.0956598940866e-09	5.46050893975909e-08	1.39005647475974e-08	AKT1/TNF/IL10/IL1B/IFNG/NOS2	6	geneontology_Biological_Process	0.206896551724138
GO:0042129	regulation of T cell proliferation	7/29	149/17913	3.20163101429469e-09	5.57864741394909e-08	1.42013043906925e-08	IL6/IL10/IL2/CASP3/IL4/IL1B/TGFB1	7	geneontology_Biological_Process	0.241379310344828
GO:0043410	positive regulation of MAPK cascade	10/29	499/17913	3.20266805250038e-09	5.57864741394909e-08	1.42013043906925e-08	JUN/MAPK3/MAPK1/MAPK14/IL6/TNF/EGFR/IL1B/TGFB1/VEGFA	10	geneontology_Biological_Process	0.344827586206897
GO:0043029	T cell homeostasis	5/29	37/17913	3.25150537778149e-09	5.62853757010995e-08	1.43283074509626e-08	AKT1/IL2/CASP3/BCL2/TGFB1	5	geneontology_Biological_Process	0.172413793103448
GO:0002819	regulation of adaptive immune response	7/29	150/17913	3.3547271968335e-09	5.77137327010801e-08	1.46919176781402e-08	IL6/TNF/IL10/IL2/IL4/IL1B/TGFB1	7	geneontology_Biological_Process	0.241379310344828
GO:0001776	leukocyte homeostasis	6/29	84/17913	3.86444900545347e-09	6.56720693792611e-08	1.67178345935535e-08	IL6/AKT1/IL2/CASP3/BCL2/TGFB1	6	geneontology_Biological_Process	0.206896551724138
GO:2001057	reactive nitrogen species metabolic process	6/29	84/17913	3.86444900545347e-09	6.56720693792611e-08	1.67178345935535e-08	AKT1/TNF/IL10/IL1B/IFNG/NOS2	6	geneontology_Biological_Process	0.206896551724138
GO:0046427	positive regulation of JAK-STAT cascade	6/29	85/17913	4.15336469898764e-09	7.01541055519913e-08	1.78588057870346e-08	IL6/TNF/IL10/IL2/IL4/IFNG	6	geneontology_Biological_Process	0.206896551724138
GO:0043406	positive regulation of MAP kinase activity	8/29	250/17913	4.28818618563523e-09	7.19950295142493e-08	1.83274412753211e-08	MAPK3/MAPK1/MAPK14/TNF/EGFR/IL1B/TGFB1/VEGFA	8	geneontology_Biological_Process	0.275862068965517
GO:0002285	lymphocyte activation involved in immune response	7/29	158/17913	4.81982415124748e-09	8.04362270031541e-08	2.04762778313319e-08	TP53/IL6/IL10/IL2/IL4/TGFB1/IFNG	7	geneontology_Biological_Process	0.241379310344828
GO:1902893	regulation of pri-miRNA transcription by RNA polymerase II	5/29	40/17913	4.89187234090995e-09	8.11526679411669e-08	2.06586588832914e-08	JUN/TP53/FOS/IL10/TGFB1	5	geneontology_Biological_Process	0.172413793103448
GO:1904894	positive regulation of STAT cascade	6/29	88/17913	5.12948150742031e-09	8.45909169300616e-08	2.15339180068595e-08	IL6/TNF/IL10/IL2/IL4/IFNG	6	geneontology_Biological_Process	0.206896551724138
GO:0051091	positive regulation of DNA-binding transcription factor activity	8/29	257/17913	5.32562078400476e-09	8.73088536765957e-08	2.22258105784471e-08	IL6/AKT1/ESR1/TNF/IL10/IL1B/TGFB1/VEGFA	8	geneontology_Biological_Process	0.275862068965517
GO:0002824	positive regulation of adaptive immune response based on somatic recombination of immune receptors built from immunoglobulin superfamily domains	6/29	89/17913	5.49421924966492e-09	8.95461347883984e-08	2.27953448708781e-08	IL6/TNF/IL2/IL4/IL1B/TGFB1	6	geneontology_Biological_Process	0.206896551724138
GO:0002708	positive regulation of lymphocyte mediated immunity	6/29	91/17913	6.28829411984652e-09	1.01892300651234e-07	2.59382511430634e-08	IL6/TNF/IL2/IL4/IL1B/TGFB1	6	geneontology_Biological_Process	0.206896551724138
GO:0001503	ossification	9/29	388/17913	6.5322711327144e-09	1.05233755184249e-07	2.67888697502252e-08	MAPK3/MAPK1/MAPK14/IL6/AKT1/TNF/EGFR/BCL2/TGFB1	9	geneontology_Biological_Process	0.310344827586207
GO:0070482	response to oxygen levels	9/29	389/17913	6.68015617416692e-09	1.06997673893122e-07	2.72379023677466e-08	TP53/AKT1/CREB1/CASP3/CDKN1A/BCL2/TGFB1/NOS2/VEGFA	9	geneontology_Biological_Process	0.310344827586207
GO:0045927	positive regulation of growth	8/29	266/17913	6.97389179088296e-09	1.10433161484039e-07	2.81124585350186e-08	MAPK1/MAPK14/AKT1/CREB1/IL2/EGFR/BCL2/VEGFA	8	geneontology_Biological_Process	0.275862068965517
GO:0071356	cellular response to tumor necrosis factor	8/29	266/17913	6.97389179088296e-09	1.10433161484039e-07	2.81124585350186e-08	MAPK3/MAPK1/MAPK14/AKT1/STAT1/TNF/CXCL8/CCL2	8	geneontology_Biological_Process	0.275862068965517
GO:0071248	cellular response to metal ion	7/29	167/17913	7.08627324388888e-09	1.10582842779354e-07	2.81505622092363e-08	JUN/MAPK3/MAPK1/AKT1/FOS/CREB1/EGFR	7	geneontology_Biological_Process	0.241379310344828
GO:0035094	response to nicotine	5/29	43/17913	7.13234222096691e-09	1.10582842779354e-07	2.81505622092363e-08	MAPK1/TNF/CREB1/CASP3/BCL2	5	geneontology_Biological_Process	0.172413793103448
GO:1901216	positive regulation of neuron death	6/29	93/17913	7.17508483653105e-09	1.10582842779354e-07	2.81505622092363e-08	JUN/TP53/FOS/TNF/CASP3/MCL1	6	geneontology_Biological_Process	0.206896551724138
GO:1903076	regulation of protein localization to plasma membrane	6/29	93/17913	7.17508483653105e-09	1.10582842779354e-07	2.81505622092363e-08	AKT1/TNF/EGFR/TGFB1/IFNG/BCL2L1	6	geneontology_Biological_Process	0.206896551724138
GO:1902105	regulation of leukocyte differentiation	8/29	267/17913	7.18173467637712e-09	1.10582842779354e-07	2.81505622092363e-08	JUN/FOS/TNF/CREB1/IL2/IL4/TGFB1/IFNG	8	geneontology_Biological_Process	0.275862068965517
GO:0002821	positive regulation of adaptive immune response	6/29	94/17913	7.65583852017248e-09	1.17235285470993e-07	2.98440437397123e-08	IL6/TNF/IL2/IL4/IL1B/TGFB1	6	geneontology_Biological_Process	0.206896551724138
GO:0051403	stress-activated MAPK cascade	8/29	271/17913	8.06768701486648e-09	1.22866905521491e-07	3.12776591775669e-08	MAPK3/MAPK1/MAPK14/AKT1/TNF/EGFR/IL1B/VEGFA	8	geneontology_Biological_Process	0.275862068965517
GO:0097193	intrinsic apoptotic signaling pathway	8/29	277/17913	9.57366223444798e-09	1.45009764388079e-07	3.69144642220706e-08	TP53/AKT1/TNF/CASP3/CDKN1A/MCL1/BCL2/BCL2L1	8	geneontology_Biological_Process	0.275862068965517
GO:0031098	stress-activated protein kinase signaling cascade	8/29	278/17913	9.84694706479973e-09	1.46859176486348e-07	3.73852604958353e-08	MAPK3/MAPK1/MAPK14/AKT1/TNF/EGFR/IL1B/VEGFA	8	geneontology_Biological_Process	0.275862068965517
GO:0002377	immunoglobulin production	6/29	98/17913	9.85384499567528e-09	1.46859176486348e-07	3.73852604958353e-08	IL6/TNF/IL10/IL2/IL4/TGFB1	6	geneontology_Biological_Process	0.206896551724138
GO:0042136	neurotransmitter biosynthetic process	6/29	98/17913	9.85384499567528e-09	1.46859176486348e-07	3.73852604958353e-08	AKT1/TNF/IL10/IL1B/IFNG/NOS2	6	geneontology_Biological_Process	0.206896551724138
GO:0002739	regulation of cytokine secretion involved in immune response	4/29	16/17913	9.94519810063156e-09	1.47432271842873e-07	3.75311507269075e-08	MAPK3/MAPK14/TNF/IL10	4	geneontology_Biological_Process	0.137931034482759
GO:0061614	pri-miRNA transcription by RNA polymerase II	5/29	46/17913	1.01225504277024e-08	1.49267449957707e-07	3.79983235214227e-08	JUN/TP53/FOS/IL10/TGFB1	5	geneontology_Biological_Process	0.172413793103448
GO:0046822	regulation of nucleocytoplasmic transport	6/29	100/17913	1.11345090005631e-08	1.62470558034394e-07	4.13593776047369e-08	TP53/MAPK1/MAPK14/IL1B/TGFB1/IFNG	6	geneontology_Biological_Process	0.206896551724138
GO:2001237	negative regulation of extrinsic apoptotic signaling pathway	6/29	100/17913	1.11345090005631e-08	1.62470558034394e-07	4.13593776047369e-08	AKT1/TNF/IL1B/MCL1/BCL2/BCL2L1	6	geneontology_Biological_Process	0.206896551724138
GO:0048511	rhythmic process	8/29	287/17913	1.26263074744625e-08	1.83278744433994e-07	4.6656421259801e-08	JUN/TP53/ESR1/CREB1/SP1/CASP3/EGFR/NOS2	8	geneontology_Biological_Process	0.275862068965517
GO:0071887	leukocyte apoptotic process	6/29	103/17913	1.33114267024997e-08	1.92222519273921e-07	4.89331966047714e-08	TP53/IL6/AKT1/IL10/IL2/CASP3	6	geneontology_Biological_Process	0.206896551724138
GO:0002703	regulation of leukocyte mediated immunity	7/29	185/17913	1.44078376263145e-08	2.06982698270817e-07	5.26906270218989e-08	IL6/TNF/IL10/IL2/IL4/IL1B/TGFB1	7	geneontology_Biological_Process	0.241379310344828
GO:0050920	regulation of chemotaxis	7/29	186/17913	1.49550850919925e-08	2.13742677699401e-07	5.44114836815275e-08	MAPK3/MAPK14/IL6/CXCL8/TGFB1/CCL2/VEGFA	7	geneontology_Biological_Process	0.241379310344828
GO:0002712	regulation of B cell mediated immunity	5/29	51/17913	1.72502900372351e-08	2.42810900675628e-07	6.18112465980674e-08	TNF/IL10/IL2/IL4/TGFB1	5	geneontology_Biological_Process	0.172413793103448
GO:0002889	regulation of immunoglobulin mediated immune response	5/29	51/17913	1.72502900372351e-08	2.42810900675628e-07	6.18112465980674e-08	TNF/IL10/IL2/IL4/TGFB1	5	geneontology_Biological_Process	0.172413793103448
GO:0048146	positive regulation of fibroblast proliferation	5/29	51/17913	1.72502900372351e-08	2.42810900675628e-07	6.18112465980674e-08	JUN/ESR1/CDKN1A/EGFR/TGFB1	5	geneontology_Biological_Process	0.172413793103448
GO:0006913	nucleocytoplasmic transport	8/29	302/17913	1.87737244587162e-08	2.6292648274594e-07	6.69319771762747e-08	TP53/MAPK1/MAPK14/AKT1/CDKN1A/IL1B/TGFB1/IFNG	8	geneontology_Biological_Process	0.275862068965517
GO:0071241	cellular response to inorganic substance	7/29	194/17913	2.00041703371117e-08	2.78758113647652e-07	7.09621621432279e-08	JUN/MAPK3/MAPK1/AKT1/FOS/CREB1/EGFR	7	geneontology_Biological_Process	0.241379310344828
GO:0051169	nuclear transport	8/29	305/17913	2.02732053105261e-08	2.8110160796237e-07	7.15587346388825e-08	TP53/MAPK1/MAPK14/AKT1/CDKN1A/IL1B/TGFB1/IFNG	8	geneontology_Biological_Process	0.275862068965517
GO:0021782	glial cell development	6/29	111/17913	2.08940753559878e-08	2.86856098606591e-07	7.30236286748032e-08	IL6/AKT1/TNF/EGFR/IL1B/TGFB1	6	geneontology_Biological_Process	0.206896551724138
GO:1904019	epithelial cell apoptotic process	6/29	111/17913	2.08940753559878e-08	2.86856098606591e-07	7.30236286748032e-08	IL6/TNF/IL10/IL4/BCL2L1/CCL2	6	geneontology_Biological_Process	0.206896551724138
GO:1903798	regulation of production of miRNAs involved in gene silencing by miRNA	4/29	19/17913	2.11091139749802e-08	2.88387748275833e-07	7.34135336384762e-08	TP53/ESR1/EGFR/TGFB1	4	geneontology_Biological_Process	0.137931034482759
GO:0009416	response to light stimulus	8/29	307/17913	2.13294056439565e-08	2.89975870876618e-07	7.38178146548224e-08	TP53/AKT1/FOS/CREB1/CASP3/CDKN1A/EGFR/BCL2	8	geneontology_Biological_Process	0.275862068965517
GO:1904375	regulation of protein localization to cell periphery	6/29	113/17913	2.32632622633561e-08	3.14731611300841e-07	8.0119768857956e-08	AKT1/TNF/EGFR/TGFB1/IFNG/BCL2L1	6	geneontology_Biological_Process	0.206896551724138
GO:0030278	regulation of ossification	7/29	199/17913	2.38417371282885e-08	3.17927853476268e-07	8.09334214276829e-08	MAPK3/MAPK1/MAPK14/IL6/TNF/BCL2/TGFB1	7	geneontology_Biological_Process	0.241379310344828
GO:0048762	mesenchymal cell differentiation	7/29	199/17913	2.38417371282885e-08	3.17927853476268e-07	8.09334214276829e-08	MAPK3/MAPK1/IL6/STAT1/IL1B/BCL2/TGFB1	7	geneontology_Biological_Process	0.241379310344828
GO:0050679	positive regulation of epithelial cell proliferation	7/29	199/17913	2.38417371282885e-08	3.17927853476268e-07	8.09334214276829e-08	JUN/AKT1/IL10/SP1/EGFR/TGFB1/VEGFA	7	geneontology_Biological_Process	0.241379310344828
GO:0072594	establishment of protein localization to organelle	9/29	452/17913	2.4500949038474e-08	3.25162595096319e-07	8.2775136099907e-08	TP53/MAPK1/MAPK14/AKT1/CDKN1A/BCL2/TGFB1/IFNG/NOS2	9	geneontology_Biological_Process	0.310344827586207
GO:0002374	cytokine secretion involved in immune response	4/29	20/17913	2.63569253648335e-08	3.48136260624601e-07	8.86234357490534e-08	MAPK3/MAPK14/TNF/IL10	4	geneontology_Biological_Process	0.137931034482759
GO:0033619	membrane protein proteolysis	5/29	56/17913	2.78943607073408e-08	3.66705581563014e-07	9.33505417912002e-08	TNF/IL10/IL1B/TGFB1/IFNG	5	geneontology_Biological_Process	0.172413793103448
GO:0002705	positive regulation of leukocyte mediated immunity	6/29	117/17913	2.86703088200069e-08	3.75136857658963e-07	9.54968527041495e-08	IL6/TNF/IL2/IL4/IL1B/TGFB1	6	geneontology_Biological_Process	0.206896551724138
GO:0001836	release of cytochrome c from mitochondria	5/29	57/17913	3.05423350894411e-08	3.95913897182661e-07	1.00785967443247e-07	JUN/TP53/AKT1/BCL2/BCL2L1	5	geneontology_Biological_Process	0.172413793103448
GO:0043525	positive regulation of neuron apoptotic process	5/29	57/17913	3.05423350894411e-08	3.95913897182661e-07	1.00785967443247e-07	JUN/TP53/TNF/CASP3/MCL1	5	geneontology_Biological_Process	0.172413793103448
GO:0043405	regulation of MAP kinase activity	8/29	322/17913	3.08831469920048e-08	3.98478382716284e-07	1.01438796650152e-07	MAPK3/MAPK1/MAPK14/TNF/EGFR/IL1B/TGFB1/VEGFA	8	geneontology_Biological_Process	0.275862068965517
GO:1901215	negative regulation of neuron death	7/29	207/17913	3.12757695497836e-08	4.0168465315782e-07	1.02255002069144e-07	JUN/AKT1/CREB1/IL10/BCL2/BCL2L1/CCL2	7	geneontology_Biological_Process	0.241379310344828
GO:0009615	response to virus	8/29	323/17913	3.16340818243326e-08	4.04422871763372e-07	1.02952057699663e-07	MAPK14/IL6/STAT1/TNF/IL1B/BCL2/IFNG/BCL2L1	8	geneontology_Biological_Process	0.275862068965517
GO:0051043	regulation of membrane protein ectodomain proteolysis	4/29	21/17913	3.25221949848227e-08	4.10132839016746e-07	1.04405617622151e-07	TNF/IL10/IL1B/IFNG	4	geneontology_Biological_Process	0.137931034482759
GO:0070920	regulation of production of small RNA involved in gene silencing by RNA	4/29	21/17913	3.25221949848227e-08	4.10132839016746e-07	1.04405617622151e-07	TP53/ESR1/EGFR/TGFB1	4	geneontology_Biological_Process	0.137931034482759
GO:2000144	positive regulation of DNA-templated transcription, initiation	4/29	21/17913	3.25221949848227e-08	4.10132839016746e-07	1.04405617622151e-07	JUN/TP53/ESR1/CREB1	4	geneontology_Biological_Process	0.137931034482759
GO:0030098	lymphocyte differentiation	8/29	325/17913	3.31833817197406e-08	4.16585967805933e-07	1.06048360735444e-07	TP53/IL6/IL10/IL2/IL4/BCL2/TGFB1/IFNG	8	geneontology_Biological_Process	0.275862068965517
GO:0046425	regulation of JAK-STAT cascade	6/29	120/17913	3.33735178984313e-08	4.17094145214924e-07	1.06177725105229e-07	IL6/TNF/IL10/IL2/IL4/IFNG	6	geneontology_Biological_Process	0.206896551724138
GO:0006914	autophagy	9/29	471/17913	3.49208555615629e-08	4.32552997555892e-07	1.10113013560203e-07	TP53/MAPK3/AKT1/IL10/CASP3/IL4/MCL1/BCL2/IFNG	9	geneontology_Biological_Process	0.310344827586207
GO:0061919	process utilizing autophagic mechanism	9/29	471/17913	3.49208555615629e-08	4.32552997555892e-07	1.10113013560203e-07	TP53/MAPK3/AKT1/IL10/CASP3/IL4/MCL1/BCL2/IFNG	9	geneontology_Biological_Process	0.310344827586207
GO:1903409	reactive oxygen species biosynthetic process	6/29	122/17913	3.6849515230887e-08	4.54423004196824e-07	1.15680359877121e-07	AKT1/TNF/IL10/IL1B/IFNG/NOS2	6	geneontology_Biological_Process	0.206896551724138
GO:0002260	lymphocyte homeostasis	5/29	60/17913	3.97048965345521e-08	4.85340883088868e-07	1.2355098113493e-07	AKT1/IL2/CASP3/BCL2/TGFB1	5	geneontology_Biological_Process	0.172413793103448
GO:0090312	positive regulation of protein deacetylation	4/29	22/17913	3.97049592193261e-08	4.85340883088868e-07	1.2355098113493e-07	TP53/TGFB1/IFNG/VEGFA	4	geneontology_Biological_Process	0.137931034482759
GO:0060627	regulation of vesicle-mediated transport	9/29	480/17913	4.10857724334361e-08	5.00026409484657e-07	1.27289407585088e-07	MAPK3/MAPK1/TNF/IL4/IL1B/TGFB1/IFNG/CCL2/VEGFA	9	geneontology_Biological_Process	0.310344827586207
GO:0050671	positive regulation of lymphocyte proliferation	6/29	125/17913	4.26200835665566e-08	5.16444229999971e-07	1.31468816127502e-07	IL6/IL2/CDKN1A/IL4/IL1B/BCL2	6	geneontology_Biological_Process	0.206896551724138
GO:0032946	positive regulation of mononuclear cell proliferation	6/29	126/17913	4.47016703430567e-08	5.39322749983113e-07	1.37292895015813e-07	IL6/IL2/CDKN1A/IL4/IL1B/BCL2	6	geneontology_Biological_Process	0.206896551724138
GO:0032872	regulation of stress-activated MAPK cascade	7/29	220/17913	4.75246272748899e-08	5.7091006989275e-07	1.45333932773484e-07	MAPK3/MAPK1/AKT1/TNF/EGFR/IL1B/VEGFA	7	geneontology_Biological_Process	0.241379310344828
GO:1901652	response to peptide	9/29	491/17913	4.98991949965522e-08	5.96862903242022e-07	1.51940625379156e-07	TP53/MAPK14/AKT1/STAT1/CREB1/IL10/SP1/IL1B/TGFB1	9	geneontology_Biological_Process	0.310344827586207
GO:0070302	regulation of stress-activated protein kinase signaling cascade	7/29	222/17913	5.05674452688827e-08	6.02271239164001e-07	1.53317400410378e-07	MAPK3/MAPK1/AKT1/TNF/EGFR/IL1B/VEGFA	7	geneontology_Biological_Process	0.241379310344828
GO:1904892	regulation of STAT cascade	6/29	129/17913	5.14561435320972e-08	6.10247966059382e-07	1.55347998838224e-07	IL6/TNF/IL10/IL2/IL4/IFNG	6	geneontology_Biological_Process	0.206896551724138
GO:0034504	protein localization to nucleus	7/29	223/17913	5.21496913015099e-08	6.15852498547915e-07	1.56774718720864e-07	TP53/MAPK1/MAPK14/AKT1/CDKN1A/TGFB1/IFNG	7	geneontology_Biological_Process	0.241379310344828
GO:0050921	positive regulation of chemotaxis	6/29	130/17913	5.38863799061886e-08	6.33676543453788e-07	1.61312103294564e-07	MAPK3/MAPK14/IL6/CXCL8/TGFB1/VEGFA	6	geneontology_Biological_Process	0.206896551724138
GO:0032768	regulation of monooxygenase activity	5/29	64/17913	5.51823659488421e-08	6.43486417989217e-07	1.63809357628362e-07	AKT1/TNF/EGFR/IL1B/IFNG	5	geneontology_Biological_Process	0.172413793103448
GO:0045670	regulation of osteoclast differentiation	5/29	64/17913	5.51823659488421e-08	6.43486417989217e-07	1.63809357628362e-07	FOS/TNF/CREB1/IL4/IFNG	5	geneontology_Biological_Process	0.172413793103448
GO:0045598	regulation of fat cell differentiation	6/29	131/17913	5.64105568124484e-08	6.55067590984557e-07	1.66757523208729e-07	MAPK14/IL6/AKT1/TNF/CREB1/TGFB1	6	geneontology_Biological_Process	0.206896551724138
GO:0048143	astrocyte activation	4/29	24/17913	5.75479283961746e-08	6.65502391867795e-07	1.69413862149035e-07	IL6/TNF/EGFR/IL1B	4	geneontology_Biological_Process	0.137931034482759
GO:0048565	digestive tract development	6/29	132/17913	5.90315050318238e-08	6.79838035221871e-07	1.73063220493472e-07	TNF/CDKN1A/EGFR/BCL2/CXCL8/TGFB1	6	geneontology_Biological_Process	0.206896551724138
GO:0045428	regulation of nitric oxide biosynthetic process	5/29	65/17913	5.9714070523291e-08	6.82061944870541e-07	1.73629350874453e-07	AKT1/TNF/IL10/IL1B/IFNG	5	geneontology_Biological_Process	0.172413793103448
GO:0097194	execution phase of apoptosis	5/29	65/17913	5.9714070523291e-08	6.82061944870541e-07	1.73629350874453e-07	TP53/IL6/AKT1/CASP3/BCL2L1	5	geneontology_Biological_Process	0.172413793103448
GO:0001666	response to hypoxia	8/29	354/17913	6.42232876035031e-08	7.30572663473319e-07	1.8597849987008e-07	TP53/AKT1/CREB1/CASP3/BCL2/TGFB1/NOS2/VEGFA	8	geneontology_Biological_Process	0.275862068965517
GO:0070665	positive regulation of leukocyte proliferation	6/29	134/17913	6.45753449825563e-08	7.31591408399936e-07	1.86237837048536e-07	IL6/IL2/CDKN1A/IL4/IL1B/BCL2	6	geneontology_Biological_Process	0.206896551724138
GO:0043903	regulation of symbiosis, encompassing mutualism through parasitism	7/29	232/17913	6.83780822588676e-08	7.69042650775891e-07	1.95771626394331e-07	JUN/STAT1/TNF/IL10/SP1/BCL2/CXCL8	7	geneontology_Biological_Process	0.241379310344828
GO:0045672	positive regulation of osteoclast differentiation	4/29	25/17913	6.84329305319056e-08	7.69042650775891e-07	1.95771626394331e-07	FOS/TNF/CREB1/IFNG	4	geneontology_Biological_Process	0.137931034482759
GO:0042531	positive regulation of tyrosine phosphorylation of STAT protein	5/29	67/17913	6.96630323959636e-08	7.79722374648797e-07	1.9849031424595e-07	IL6/TNF/IL2/IL4/IFNG	5	geneontology_Biological_Process	0.172413793103448
GO:0009267	cellular response to starvation	6/29	136/17913	7.05417828265234e-08	7.86399794950083e-07	2.0019015421085e-07	JUN/TP53/MAPK3/MAPK1/CDKN1A/BCL2	6	geneontology_Biological_Process	0.206896551724138
GO:0030217	T cell differentiation	7/29	234/17913	7.25125736314149e-08	8.05149572552802e-07	2.04963198270386e-07	TP53/IL6/IL2/IL4/BCL2/TGFB1/IFNG	7	geneontology_Biological_Process	0.241379310344828
GO:0009411	response to UV	6/29	137/17913	7.36912165355754e-08	8.14989763827971e-07	2.07468170196232e-07	TP53/AKT1/CASP3/CDKN1A/EGFR/BCL2	6	geneontology_Biological_Process	0.206896551724138
GO:0030879	mammary gland development	6/29	138/17913	7.69557176330895e-08	8.47729585151859e-07	2.15802594902027e-07	MAPK1/AKT1/ESR1/CREB1/TGFB1/VEGFA	6	geneontology_Biological_Process	0.206896551724138
GO:0071479	cellular response to ionizing radiation	5/29	69/17913	8.08850596730719e-08	8.87506540586029e-07	2.25928430251349e-07	TP53/MAPK14/CDKN1A/TGFB1/BCL2L1	5	geneontology_Biological_Process	0.172413793103448
GO:0036293	response to decreased oxygen levels	8/29	365/17913	8.12851650955531e-08	8.88399039691399e-07	2.26155629615698e-07	TP53/AKT1/CREB1/CASP3/BCL2/TGFB1/NOS2/VEGFA	8	geneontology_Biological_Process	0.275862068965517
GO:0055123	digestive system development	6/29	143/17913	9.51212206738207e-08	1.03555797663257e-06	2.63617198742414e-07	TNF/CDKN1A/EGFR/BCL2/CXCL8/TGFB1	6	geneontology_Biological_Process	0.206896551724138
GO:0042542	response to hydrogen peroxide	6/29	144/17913	9.91472698013467e-08	1.07102108890059e-06	2.72644879013087e-07	JUN/IL6/STAT1/IL10/CASP3/BCL2	6	geneontology_Biological_Process	0.206896551724138
GO:0045834	positive regulation of lipid metabolic process	6/29	144/17913	9.91472698013467e-08	1.07102108890059e-06	2.72644879013087e-07	AKT1/TNF/CREB1/IL1B/TGFB1/IFNG	6	geneontology_Biological_Process	0.206896551724138
GO:0042133	neurotransmitter metabolic process	6/29	145/17913	1.03312742109905e-07	1.11170892764597e-06	2.83002593708904e-07	AKT1/TNF/IL10/IL1B/IFNG/NOS2	6	geneontology_Biological_Process	0.206896551724138
GO:0032770	positive regulation of monooxygenase activity	4/29	28/17913	1.10393299541628e-07	1.18333125316353e-06	3.01235157453673e-07	AKT1/TNF/IL1B/IFNG	4	geneontology_Biological_Process	0.137931034482759
GO:1900182	positive regulation of protein localization to nucleus	5/29	74/17913	1.15290277685077e-07	1.23108813757973e-06	3.13392406371211e-07	MAPK1/MAPK14/AKT1/TGFB1/IFNG	5	geneontology_Biological_Process	0.172413793103448
GO:0031668	cellular response to extracellular stimulus	7/29	251/17913	1.1703203004683e-07	1.24491705244471e-06	3.16912769190692e-07	JUN/TP53/MAPK3/MAPK1/FOS/CDKN1A/BCL2	7	geneontology_Biological_Process	0.241379310344828
GO:0060326	cell chemotaxis	7/29	253/17913	1.23532993197409e-07	1.30907396213376e-06	3.33244896598174e-07	MAPK3/MAPK14/IL6/IL10/CXCL8/CCL2/VEGFA	7	geneontology_Biological_Process	0.241379310344828
GO:0090316	positive regulation of intracellular protein transport	6/29	150/17913	1.2636556842968e-07	1.33401833035424e-06	3.3959486890592e-07	TP53/MAPK1/MAPK14/IL1B/TGFB1/IFNG	6	geneontology_Biological_Process	0.206896551724138
GO:0001890	placenta development	6/29	151/17913	1.31449081404471e-07	1.37725033787316e-06	3.5060024086511e-07	MAPK3/MAPK1/MAPK14/AKT1/IL10/EGFR	6	geneontology_Biological_Process	0.206896551724138
GO:2001236	regulation of extrinsic apoptotic signaling pathway	6/29	151/17913	1.31449081404471e-07	1.37725033787316e-06	3.5060024086511e-07	AKT1/TNF/IL1B/MCL1/BCL2/BCL2L1	6	geneontology_Biological_Process	0.206896551724138
GO:0071260	cellular response to mechanical stimulus	5/29	77/17913	1.40932740597031e-07	1.46769477576461e-06	3.73624262597152e-07	MAPK3/AKT1/EGFR/IL1B/TGFB1	5	geneontology_Biological_Process	0.172413793103448
GO:0060485	mesenchyme development	7/29	258/17913	1.41134625010734e-07	1.46769477576461e-06	3.73624262597152e-07	MAPK3/MAPK1/IL6/STAT1/IL1B/BCL2/TGFB1	7	geneontology_Biological_Process	0.241379310344828
GO:2000142	regulation of DNA-templated transcription, initiation	4/29	30/17913	1.47427354296602e-07	1.52743507964546e-06	3.88832075116062e-07	JUN/TP53/ESR1/CREB1	4	geneontology_Biological_Process	0.137931034482759
GO:0001558	regulation of cell growth	8/29	396/17913	1.51927330856772e-07	1.56822767073268e-06	3.99216456130466e-07	TP53/AKT1/IL2/CDKN1A/EGFR/BCL2/TGFB1/VEGFA	8	geneontology_Biological_Process	0.275862068965517
GO:0042509	regulation of tyrosine phosphorylation of STAT protein	5/29	79/17913	1.60401091408767e-07	1.64958613194182e-06	4.19927502853015e-07	IL6/TNF/IL2/IL4/IFNG	5	geneontology_Biological_Process	0.172413793103448
GO:0046889	positive regulation of lipid biosynthetic process	5/29	81/17913	1.81943165882581e-07	1.86424854159836e-06	4.7457311843986e-07	AKT1/TNF/CREB1/IL1B/IFNG	5	geneontology_Biological_Process	0.172413793103448
GO:0043491	protein kinase B signaling	7/29	268/17913	1.82755517115052e-07	1.86571291648223e-06	4.74945897572951e-07	AKT1/ESR1/TNF/EGFR/IL1B/TGFB1/CCL2	7	geneontology_Biological_Process	0.241379310344828
GO:0035821	modification of morphology or physiology of other organism	6/29	160/17913	1.85259068324283e-07	1.88436869861232e-06	4.79695013640286e-07	JUN/SP1/TGFB1/IFNG/BCL2L1/NOS2	6	geneontology_Biological_Process	0.206896551724138
GO:0007260	tyrosine phosphorylation of STAT protein	5/29	82/17913	1.93541009780036e-07	1.9614501609344e-06	4.99317284561701e-07	IL6/TNF/IL2/IL4/IFNG	5	geneontology_Biological_Process	0.172413793103448
GO:0043254	regulation of protein complex assembly	8/29	409/17913	1.94479646221435e-07	1.96382164499688e-06	4.99920982277831e-07	JUN/TP53/ESR1/TNF/CREB1/TGFB1/IFNG/VEGFA	8	geneontology_Biological_Process	0.275862068965517
GO:0010507	negative regulation of autophagy	5/29	83/17913	2.05717204016178e-07	2.06979728372956e-06	5.26898709887531e-07	TP53/AKT1/IL10/MCL1/BCL2	5	geneontology_Biological_Process	0.172413793103448
GO:0045191	regulation of isotype switching	4/29	33/17913	2.19395686596536e-07	2.19948121778614e-06	5.59911748451591e-07	IL10/IL2/IL4/TGFB1	4	geneontology_Biological_Process	0.137931034482759
GO:0045844	positive regulation of striated muscle tissue development	5/29	85/17913	2.31888902973433e-07	2.30812275923913e-06	5.8756812257178e-07	MAPK1/MAPK14/CREB1/BCL2/TGFB1	5	geneontology_Biological_Process	0.172413793103448
GO:0048636	positive regulation of muscle organ development	5/29	85/17913	2.31888902973433e-07	2.30812275923913e-06	5.8756812257178e-07	MAPK1/MAPK14/CREB1/BCL2/TGFB1	5	geneontology_Biological_Process	0.172413793103448
GO:0034103	regulation of tissue remodeling	5/29	86/17913	2.45927727749822e-07	2.43049850084664e-06	6.18720748426203e-07	TP53/IL6/IL2/EGFR/TGFB1	5	geneontology_Biological_Process	0.172413793103448
GO:1901863	positive regulation of muscle tissue development	5/29	86/17913	2.45927727749822e-07	2.43049850084664e-06	6.18720748426203e-07	MAPK1/MAPK14/CREB1/BCL2/TGFB1	5	geneontology_Biological_Process	0.172413793103448
GO:0032660	regulation of interleukin-17 production	4/29	34/17913	2.48370767458084e-07	2.44596936009074e-06	6.22659093422907e-07	IL6/IL2/TGFB1/IFNG	4	geneontology_Biological_Process	0.137931034482759
GO:0030324	lung development	6/29	169/17913	2.56020570422154e-07	2.50361168339138e-06	6.37332832740653e-07	MAPK3/MAPK1/TNF/CREB1/EGFR/VEGFA	6	geneontology_Biological_Process	0.206896551724138
GO:2001252	positive regulation of chromosome organization	6/29	169/17913	2.56020570422154e-07	2.50361168339138e-06	6.37332832740653e-07	TP53/MAPK3/MAPK1/IL1B/TGFB1/VEGFA	6	geneontology_Biological_Process	0.206896551724138
GO:0031058	positive regulation of histone modification	5/29	88/17913	2.7602324215367e-07	2.68977893665133e-06	6.84724568316429e-07	TP53/MAPK3/IL1B/TGFB1/VEGFA	5	geneontology_Biological_Process	0.172413793103448
GO:0050890	cognition	7/29	286/17913	2.83911910824123e-07	2.75701217932693e-06	7.01839823566693e-07	JUN/MAPK1/FOS/TNF/CREB1/CASP3/EGFR	7	geneontology_Biological_Process	0.241379310344828
GO:0010634	positive regulation of epithelial cell migration	6/29	173/17913	2.93914175384415e-07	2.83439033493552e-06	7.21537622324151e-07	JUN/AKT1/SP1/TGFB1/IFNG/VEGFA	6	geneontology_Biological_Process	0.206896551724138
GO:0030323	respiratory tube development	6/29	173/17913	2.93914175384415e-07	2.83439033493552e-06	7.21537622324151e-07	MAPK3/MAPK1/TNF/CREB1/EGFR/VEGFA	6	geneontology_Biological_Process	0.206896551724138
GO:0042594	response to starvation	6/29	174/17913	3.04074554795251e-07	2.91791282861138e-06	7.42799556770747e-07	JUN/TP53/MAPK3/MAPK1/CDKN1A/BCL2	6	geneontology_Biological_Process	0.206896551724138
GO:0070371	ERK1 and ERK2 cascade	7/29	289/17913	3.04669046690316e-07	2.91791282861138e-06	7.42799556770747e-07	JUN/MAPK3/MAPK1/TNF/EGFR/IL1B/TGFB1	7	geneontology_Biological_Process	0.241379310344828
GO:0060251	regulation of glial cell proliferation	4/29	36/17913	3.14766726223104e-07	3.00429748624586e-06	7.64790099042437e-07	IL6/TNF/CREB1/IL1B	4	geneontology_Biological_Process	0.137931034482759
GO:0002449	lymphocyte mediated immunity	7/29	293/17913	3.34324744059287e-07	3.18007870885062e-06	8.09537910889022e-07	IL6/TNF/IL10/IL2/IL4/IL1B/TGFB1	7	geneontology_Biological_Process	0.241379310344828
GO:2000045	regulation of G1/S transition of mitotic cell cycle	6/29	177/17913	3.36303197281213e-07	3.18801704361476e-06	8.11558736009801e-07	TP53/AKT1/CDKN1A/EGFR/BCL2/CCL2	6	geneontology_Biological_Process	0.206896551724138
GO:0010632	regulation of epithelial cell migration	7/29	294/17913	3.42107438145564e-07	3.23204552580232e-06	8.22766862837145e-07	JUN/AKT1/SP1/IL4/TGFB1/IFNG/VEGFA	7	geneontology_Biological_Process	0.241379310344828
GO:0008630	intrinsic apoptotic signaling pathway in response to DNA damage	5/29	92/17913	3.44943318053029e-07	3.24782779531687e-06	8.26784482104345e-07	TP53/TNF/CDKN1A/BCL2/BCL2L1	5	geneontology_Biological_Process	0.172413793103448
GO:0061138	morphogenesis of a branching epithelium	6/29	178/17913	3.47649880610481e-07	3.26229029380947e-06	8.30466133373966e-07	ESR1/TNF/IL10/BCL2/TGFB1/VEGFA	6	geneontology_Biological_Process	0.206896551724138
GO:0002460	adaptive immune response based on somatic recombination of immune receptors built from immunoglobulin superfamily domains	7/29	295/17913	3.50042351359492e-07	3.26408761295165e-06	8.30923668585126e-07	IL6/TNF/IL10/IL2/IL4/IL1B/TGFB1	7	geneontology_Biological_Process	0.241379310344828
GO:0002714	positive regulation of B cell mediated immunity	4/29	37/17913	3.52526146931627e-07	3.26408761295165e-06	8.30923668585126e-07	TNF/IL2/IL4/TGFB1	4	geneontology_Biological_Process	0.137931034482759
GO:0002891	positive regulation of immunoglobulin mediated immune response	4/29	37/17913	3.52526146931627e-07	3.26408761295165e-06	8.30923668585126e-07	TNF/IL2/IL4/TGFB1	4	geneontology_Biological_Process	0.137931034482759
GO:0042307	positive regulation of protein import into nucleus	4/29	37/17913	3.52526146931627e-07	3.26408761295165e-06	8.30923668585126e-07	MAPK1/MAPK14/TGFB1/IFNG	4	geneontology_Biological_Process	0.137931034482759
GO:0032620	interleukin-17 production	4/29	38/17913	3.93559814329108e-07	3.63195762428882e-06	9.24570633871798e-07	IL6/IL2/TGFB1/IFNG	4	geneontology_Biological_Process	0.137931034482759
GO:0046879	hormone secretion	7/29	301/17913	4.00985158045662e-07	3.68826942400415e-06	9.38905667961702e-07	IL6/TNF/CREB1/EGFR/IL1B/IFNG/NOS2	7	geneontology_Biological_Process	0.241379310344828
GO:0008585	female gonad development	5/29	95/17913	4.05050410961211e-07	3.71340623470031e-06	9.45304629459336e-07	ESR1/CASP3/BCL2/BCL2L1/VEGFA	5	geneontology_Biological_Process	0.172413793103448
GO:0048639	positive regulation of developmental growth	6/29	183/17913	4.09210553308667e-07	3.72729479019064e-06	9.48840174716633e-07	MAPK1/MAPK14/AKT1/CREB1/BCL2/VEGFA	6	geneontology_Biological_Process	0.206896551724138
GO:0002683	negative regulation of immune system process	8/29	451/17913	4.09240116899295e-07	3.72729479019064e-06	9.48840174716633e-07	AKT1/TNF/IL10/IL2/CASP3/IL4/TGFB1/CCL2	8	geneontology_Biological_Process	0.275862068965517
GO:0042116	macrophage activation	5/29	96/17913	4.26828041562829e-07	3.87482003855246e-06	9.86394994045421e-07	JUN/IL6/TNF/IL10/IFNG	5	geneontology_Biological_Process	0.172413793103448
GO:0030890	positive regulation of B cell proliferation	4/29	39/17913	4.38048344352227e-07	3.95094089226426e-06	1.00577272728122e-06	IL2/CDKN1A/IL4/BCL2	4	geneontology_Biological_Process	0.137931034482759
GO:1904591	positive regulation of protein import	4/29	39/17913	4.38048344352227e-07	3.95094089226426e-06	1.00577272728122e-06	MAPK1/MAPK14/TGFB1/IFNG	4	geneontology_Biological_Process	0.137931034482759
GO:1903799	negative regulation of production of miRNAs involved in gene silencing by miRNA	3/29	10/17913	4.54315260692889e-07	4.07130749694882e-06	1.03641389645289e-06	TP53/ESR1/TGFB1	3	geneontology_Biological_Process	0.103448275862069
GO:1903800	positive regulation of production of miRNAs involved in gene silencing by miRNA	3/29	10/17913	4.54315260692889e-07	4.07130749694882e-06	1.03641389645289e-06	TP53/EGFR/TGFB1	3	geneontology_Biological_Process	0.103448275862069
GO:0030595	leukocyte chemotaxis	6/29	188/17913	4.79457884835594e-07	4.28284975973334e-06	1.09026523069902e-06	MAPK3/MAPK14/IL6/IL10/CXCL8/CCL2	6	geneontology_Biological_Process	0.206896551724138
GO:0006509	membrane protein ectodomain proteolysis	4/29	40/17913	4.8617684124237e-07	4.32899315189293e-06	1.10201174036441e-06	TNF/IL10/IL1B/IFNG	4	geneontology_Biological_Process	0.137931034482759
GO:0009914	hormone transport	7/29	311/17913	4.99755536027302e-07	4.43572827677736e-06	1.1291828068468e-06	IL6/TNF/CREB1/EGFR/IL1B/IFNG/NOS2	7	geneontology_Biological_Process	0.241379310344828
GO:0046545	development of primary female sexual characteristics	5/29	100/17913	5.23383159694832e-07	4.62457960244115e-06	1.17725781430526e-06	ESR1/CASP3/BCL2/BCL2L1/VEGFA	5	geneontology_Biological_Process	0.172413793103448
GO:0016049	cell growth	8/29	466/17913	5.24351329160891e-07	4.62457960244115e-06	1.17725781430526e-06	TP53/AKT1/IL2/CDKN1A/EGFR/BCL2/TGFB1/VEGFA	8	geneontology_Biological_Process	0.275862068965517
GO:1901654	response to ketone	6/29	191/17913	5.26158714460966e-07	4.62588118991392e-06	1.17758915340093e-06	AKT1/FOS/CDKN1A/EGFR/TGFB1/BCL2L1	6	geneontology_Biological_Process	0.206896551724138
GO:0002639	positive regulation of immunoglobulin production	4/29	41/17913	5.38134870188059e-07	4.7015106056869e-06	1.19684178355635e-06	IL6/IL2/IL4/TGFB1	4	geneontology_Biological_Process	0.137931034482759
GO:0014002	astrocyte development	4/29	41/17913	5.38134870188059e-07	4.7015106056869e-06	1.19684178355635e-06	IL6/TNF/EGFR/IL1B	4	geneontology_Biological_Process	0.137931034482759
GO:0001763	morphogenesis of a branching structure	6/29	192/17913	5.42530825571331e-07	4.72510440896031e-06	1.2028479487996e-06	ESR1/TNF/IL10/BCL2/TGFB1/VEGFA	6	geneontology_Biological_Process	0.206896551724138
GO:1903426	regulation of reactive oxygen species biosynthetic process	5/29	101/17913	5.50026830653777e-07	4.76063595351576e-06	1.21189304956079e-06	AKT1/TNF/IL10/IL1B/IFNG	5	geneontology_Biological_Process	0.172413793103448
GO:1905269	positive regulation of chromatin organization	5/29	101/17913	5.50026830653777e-07	4.76063595351576e-06	1.21189304956079e-06	TP53/MAPK3/IL1B/TGFB1/VEGFA	5	geneontology_Biological_Process	0.172413793103448
GO:0060541	respiratory system development	6/29	193/17913	5.5931887621694e-07	4.82607339943224e-06	1.22855115714589e-06	MAPK3/MAPK1/TNF/CREB1/EGFR/VEGFA	6	geneontology_Biological_Process	0.206896551724138
GO:0031099	regeneration	6/29	194/17913	5.7653104768119e-07	4.95923466014653e-06	1.26244940265472e-06	JUN/IL10/CDKN1A/EGFR/BCL2/TGFB1	6	geneontology_Biological_Process	0.206896551724138
GO:0045429	positive regulation of nitric oxide biosynthetic process	4/29	42/17913	5.94116430061695e-07	5.04868138149087e-06	1.2852194403055e-06	AKT1/TNF/IL1B/IFNG	4	geneontology_Biological_Process	0.137931034482759
GO:0090311	regulation of protein deacetylation	4/29	42/17913	5.94116430061695e-07	5.04868138149087e-06	1.2852194403055e-06	TP53/TGFB1/IFNG/VEGFA	4	geneontology_Biological_Process	0.137931034482759
GO:0046890	regulation of lipid biosynthetic process	6/29	195/17913	5.94175634420167e-07	5.04868138149087e-06	1.2852194403055e-06	AKT1/TNF/CREB1/SP1/IL1B/IFNG	6	geneontology_Biological_Process	0.206896551724138
GO:1902806	regulation of cell cycle G1/S phase transition	6/29	195/17913	5.94175634420167e-07	5.04868138149087e-06	1.2852194403055e-06	TP53/AKT1/CDKN1A/EGFR/BCL2/CCL2	6	geneontology_Biological_Process	0.206896551724138
GO:0046886	positive regulation of hormone biosynthetic process	3/29	11/17913	6.2400347608695e-07	5.28601120928368e-06	1.34563539556104e-06	TNF/IL1B/IFNG	3	geneontology_Biological_Process	0.103448275862069
GO:0007178	transmembrane receptor protein serine/threonine kinase signaling pathway	7/29	323/17913	6.44608078421309e-07	5.44400822593996e-06	1.38585596445283e-06	JUN/TP53/MAPK3/MAPK14/FOS/CREB1/TGFB1	7	geneontology_Biological_Process	0.241379310344828
GO:1904407	positive regulation of nitric oxide metabolic process	4/29	43/17913	6.54319926250487e-07	5.5093342430819e-06	1.40248570613079e-06	AKT1/TNF/IL1B/IFNG	4	geneontology_Biological_Process	0.137931034482759
GO:0002688	regulation of leukocyte chemotaxis	5/29	105/17913	6.67523857303976e-07	5.5844139761031e-06	1.42159840609351e-06	MAPK3/MAPK14/IL6/CXCL8/CCL2	5	geneontology_Biological_Process	0.172413793103448
GO:0051341	regulation of oxidoreductase activity	5/29	105/17913	6.67523857303976e-07	5.5844139761031e-06	1.42159840609351e-06	AKT1/TNF/EGFR/IL1B/IFNG	5	geneontology_Biological_Process	0.172413793103448
GO:0071229	cellular response to acid chemical	6/29	199/17913	6.69248033017021e-07	5.5844139761031e-06	1.42159840609351e-06	AKT1/TNF/CREB1/EGFR/BCL2L1/VEGFA	6	geneontology_Biological_Process	0.206896551724138
GO:0048638	regulation of developmental growth	7/29	325/17913	6.7188346985088e-07	5.58966934469971e-06	1.42293624094106e-06	MAPK1/MAPK14/AKT1/CREB1/CDKN1A/BCL2/VEGFA	7	geneontology_Biological_Process	0.241379310344828
GO:0043200	response to amino acid	5/29	106/17913	6.997859796977e-07	5.80447477802824e-06	1.47761826540178e-06	TNF/CREB1/CASP3/EGFR/BCL2L1	5	geneontology_Biological_Process	0.172413793103448
GO:0035196	production of miRNAs involved in gene silencing by miRNA	4/29	44/17913	7.18948143581249e-07	5.94572248118974e-06	1.51357503911842e-06	TP53/ESR1/EGFR/TGFB1	4	geneontology_Biological_Process	0.137931034482759
GO:0001938	positive regulation of endothelial cell proliferation	5/29	107/17913	7.33268095778905e-07	6.04620764182192e-06	1.53915508114289e-06	JUN/AKT1/IL10/SP1/VEGFA	5	geneontology_Biological_Process	0.172413793103448
GO:0001101	response to acid chemical	7/29	330/17913	7.44353446569372e-07	6.11950753861015e-06	1.55781469643769e-06	AKT1/TNF/CREB1/CASP3/EGFR/BCL2L1/VEGFA	7	geneontology_Biological_Process	0.241379310344828
GO:0032388	positive regulation of intracellular transport	6/29	203/17913	7.51932649198447e-07	6.16363615681198e-06	1.56904831442648e-06	TP53/MAPK1/MAPK14/IL1B/TGFB1/IFNG	6	geneontology_Biological_Process	0.206896551724138
GO:0050792	regulation of viral process	6/29	204/17913	7.73861328253554e-07	6.32478452153272e-06	1.61007110740206e-06	JUN/STAT1/TNF/SP1/BCL2/CXCL8	6	geneontology_Biological_Process	0.206896551724138
GO:0071675	regulation of mononuclear cell migration	4/29	45/17913	7.88208219338835e-07	6.42320557689279e-06	1.63512569970568e-06	MAPK3/MAPK14/TNF/TGFB1	4	geneontology_Biological_Process	0.137931034482759
GO:0042368	vitamin D biosynthetic process	3/29	12/17913	8.31098970831343e-07	6.75298201663835e-06	1.71907536087257e-06	TNF/IL1B/IFNG	3	geneontology_Biological_Process	0.103448275862069
GO:0031331	positive regulation of cellular catabolic process	7/29	341/17913	9.27198762212039e-07	7.51192718106091e-06	1.91227651692446e-06	MAPK3/IL6/AKT1/TNF/IL4/IL1B/IFNG	7	geneontology_Biological_Process	0.241379310344828
GO:0002204	somatic recombination of immunoglobulin genes involved in immune response	4/29	47/17913	9.41474096328346e-07	7.5399089266296e-06	1.91939970031853e-06	IL10/IL2/IL4/TGFB1	4	geneontology_Biological_Process	0.137931034482759
GO:0002208	somatic diversification of immunoglobulins involved in immune response	4/29	47/17913	9.41474096328346e-07	7.5399089266296e-06	1.91939970031853e-06	IL10/IL2/IL4/TGFB1	4	geneontology_Biological_Process	0.137931034482759
GO:0045190	isotype switching	4/29	47/17913	9.41474096328346e-07	7.5399089266296e-06	1.91939970031853e-06	IL10/IL2/IL4/TGFB1	4	geneontology_Biological_Process	0.137931034482759
GO:0070849	response to epidermal growth factor	4/29	47/17913	9.41474096328346e-07	7.5399089266296e-06	1.91939970031853e-06	MAPK3/MAPK1/AKT1/EGFR	4	geneontology_Biological_Process	0.137931034482759
GO:0001701	in utero embryonic development	7/29	342/17913	9.45544550877225e-07	7.55080992348088e-06	1.9221747166076e-06	TP53/MAPK1/AKT1/IL10/EGFR/BCL2L1/VEGFA	7	geneontology_Biological_Process	0.241379310344828
GO:0046660	female sex differentiation	5/29	114/17913	1.0046798416318e-06	8.00012205322234e-06	2.0365540248416e-06	ESR1/CASP3/BCL2/BCL2L1/VEGFA	5	geneontology_Biological_Process	0.172413793103448
GO:0031050	dsRNA processing	4/29	48/17913	1.02591569289233e-06	8.12280407980375e-06	2.06778462024351e-06	TP53/ESR1/EGFR/TGFB1	4	geneontology_Biological_Process	0.137931034482759
GO:0070918	production of small RNA involved in gene silencing by RNA	4/29	48/17913	1.02591569289233e-06	8.12280407980375e-06	2.06778462024351e-06	TP53/ESR1/EGFR/TGFB1	4	geneontology_Biological_Process	0.137931034482759
GO:0030656	regulation of vitamin metabolic process	3/29	13/17913	1.07925261377125e-06	8.49682778130076e-06	2.16299810193822e-06	TNF/IL1B/IFNG	3	geneontology_Biological_Process	0.103448275862069
GO:0045073	regulation of chemokine biosynthetic process	3/29	13/17913	1.07925261377125e-06	8.49682778130076e-06	2.16299810193822e-06	IL6/TNF/IL1B	3	geneontology_Biological_Process	0.103448275862069
GO:0022612	gland morphogenesis	5/29	116/17913	1.09520552218701e-06	8.59813462066254e-06	2.18878731491192e-06	ESR1/TNF/EGFR/BCL2/TGFB1	5	geneontology_Biological_Process	0.172413793103448
GO:0016447	somatic recombination of immunoglobulin gene segments	4/29	49/17913	1.11586068523573e-06	8.73568463413477e-06	2.22380278488729e-06	IL10/IL2/IL4/TGFB1	4	geneontology_Biological_Process	0.137931034482759
GO:1900180	regulation of protein localization to nucleus	5/29	117/17913	1.14281870135518e-06	8.92166868536944e-06	2.27114788357185e-06	MAPK1/MAPK14/AKT1/TGFB1/IFNG	5	geneontology_Biological_Process	0.172413793103448
GO:0010631	epithelial cell migration	7/29	354/17913	1.19061289009676e-06	9.24300313286815e-06	2.35294850586487e-06	JUN/AKT1/SP1/IL4/TGFB1/IFNG/VEGFA	7	geneontology_Biological_Process	0.241379310344828
GO:0042176	regulation of protein catabolic process	7/29	354/17913	1.19061289009676e-06	9.24300313286815e-06	2.35294850586487e-06	AKT1/TNF/IL10/EGFR/IL1B/IFNG/NOS2	7	geneontology_Biological_Process	0.241379310344828
GO:0031669	cellular response to nutrient levels	6/29	220/17913	1.20250715066516e-06	9.27625058156289e-06	2.36141215491979e-06	JUN/TP53/MAPK3/MAPK1/CDKN1A/BCL2	6	geneontology_Biological_Process	0.206896551724138
GO:0033157	regulation of intracellular protein transport	6/29	220/17913	1.20250715066516e-06	9.27625058156289e-06	2.36141215491979e-06	TP53/MAPK1/MAPK14/IL1B/TGFB1/IFNG	6	geneontology_Biological_Process	0.206896551724138
GO:0001774	microglial cell activation	4/29	50/17913	1.21153757147072e-06	9.27625058156289e-06	2.36141215491979e-06	JUN/IL6/TNF/IFNG	4	geneontology_Biological_Process	0.137931034482759
GO:0002269	leukocyte activation involved in inflammatory response	4/29	50/17913	1.21153757147072e-06	9.27625058156289e-06	2.36141215491979e-06	JUN/IL6/TNF/IFNG	4	geneontology_Biological_Process	0.137931034482759
GO:0014009	glial cell proliferation	4/29	50/17913	1.21153757147072e-06	9.27625058156289e-06	2.36141215491979e-06	IL6/TNF/CREB1/IL1B	4	geneontology_Biological_Process	0.137931034482759
GO:0008637	apoptotic mitochondrial changes	5/29	119/17913	1.2429416481642e-06	9.49062568064007e-06	2.4159846311829e-06	JUN/TP53/AKT1/BCL2/BCL2L1	5	geneontology_Biological_Process	0.172413793103448
GO:0090132	epithelium migration	7/29	357/17913	1.25958469885383e-06	9.5914277478296e-06	2.44164534664217e-06	JUN/AKT1/SP1/IL4/TGFB1/IFNG/VEGFA	7	geneontology_Biological_Process	0.241379310344828
GO:0045444	fat cell differentiation	6/29	222/17913	1.26758981758238e-06	9.62608398256698e-06	2.45046762383629e-06	MAPK14/IL6/AKT1/TNF/CREB1/TGFB1	6	geneontology_Biological_Process	0.206896551724138
GO:0042089	cytokine biosynthetic process	5/29	120/17913	1.29553156687141e-06	9.81153933932232e-06	2.49767813521547e-06	IL6/TNF/IL10/IL4/IL1B	5	geneontology_Biological_Process	0.172413793103448
GO:2001234	negative regulation of apoptotic signaling pathway	6/29	223/17913	1.30119645701872e-06	9.82773584203567e-06	2.5018012039099e-06	AKT1/TNF/IL1B/MCL1/BCL2/BCL2L1	6	geneontology_Biological_Process	0.206896551724138
GO:0050999	regulation of nitric-oxide synthase activity	4/29	51/17913	1.31317904223101e-06	9.86477086441466e-06	2.51122903805846e-06	AKT1/TNF/EGFR/IL1B	4	geneontology_Biological_Process	0.137931034482759
GO:0150077	regulation of neuroinflammatory response	4/29	51/17913	1.31317904223101e-06	9.86477086441466e-06	2.51122903805846e-06	IL6/TNF/IL4/IL1B	4	geneontology_Biological_Process	0.137931034482759
GO:0042107	cytokine metabolic process	5/29	121/17913	1.34986154934273e-06	1.00859628365099e-05	2.5675368541188e-06	IL6/TNF/IL10/IL4/IL1B	5	geneontology_Biological_Process	0.172413793103448
GO:1903038	negative regulation of leukocyte cell-cell adhesion	5/29	121/17913	1.34986154934273e-06	1.00859628365099e-05	2.5675368541188e-06	AKT1/IL10/IL2/CASP3/TGFB1	5	geneontology_Biological_Process	0.172413793103448
GO:0042033	chemokine biosynthetic process	3/29	14/17913	1.37209911849853e-06	1.01165085800408e-05	2.57531274260097e-06	IL6/TNF/IL1B	3	geneontology_Biological_Process	0.103448275862069
GO:0045591	positive regulation of regulatory T cell differentiation	3/29	14/17913	1.37209911849853e-06	1.01165085800408e-05	2.57531274260097e-06	IL2/TGFB1/IFNG	3	geneontology_Biological_Process	0.103448275862069
GO:0050755	chemokine metabolic process	3/29	14/17913	1.37209911849853e-06	1.01165085800408e-05	2.57531274260097e-06	IL6/TNF/IL1B	3	geneontology_Biological_Process	0.103448275862069
GO:0051123	RNA polymerase II preinitiation complex assembly	3/29	14/17913	1.37209911849853e-06	1.01165085800408e-05	2.57531274260097e-06	TP53/ESR1/CREB1	3	geneontology_Biological_Process	0.103448275862069
GO:0060261	positive regulation of transcription initiation from RNA polymerase II promoter	3/29	14/17913	1.37209911849853e-06	1.01165085800408e-05	2.57531274260097e-06	TP53/ESR1/CREB1	3	geneontology_Biological_Process	0.103448275862069
GO:0035270	endocrine system development	5/29	122/17913	1.40597317473212e-06	1.03238697220211e-05	2.62809970828555e-06	MAPK3/MAPK1/IL6/AKT1/CREB1	5	geneontology_Biological_Process	0.172413793103448
GO:0090130	tissue migration	7/29	363/17913	1.40763203960101e-06	1.03238697220211e-05	2.62809970828555e-06	JUN/AKT1/SP1/IL4/TGFB1/IFNG/VEGFA	7	geneontology_Biological_Process	0.241379310344828
GO:0002720	positive regulation of cytokine production involved in immune response	4/29	52/17913	1.42102195433903e-06	1.03675083422588e-05	2.63920858976166e-06	MAPK3/MAPK14/IL6/IL1B	4	geneontology_Biological_Process	0.137931034482759
GO:0051353	positive regulation of oxidoreductase activity	4/29	52/17913	1.42102195433903e-06	1.03675083422588e-05	2.63920858976166e-06	AKT1/TNF/IL1B/IFNG	4	geneontology_Biological_Process	0.137931034482759
GO:1901653	cellular response to peptide	7/29	364/17913	1.4336721258574e-06	1.04324914223618e-05	2.65575103154566e-06	TP53/AKT1/STAT1/CREB1/SP1/IL1B/TGFB1	7	geneontology_Biological_Process	0.241379310344828
GO:0051098	regulation of binding	7/29	368/17913	1.54191513784938e-06	1.11909309614224e-05	2.84882347289057e-06	JUN/MAPK3/AKT1/IL10/BCL2/TGFB1/IFNG	7	geneontology_Biological_Process	0.241379310344828
GO:0050663	cytokine secretion	6/29	230/17913	1.5574608180453e-06	1.12743981815383e-05	2.87007133660296e-06	MAPK3/MAPK14/TNF/IL10/IL1B/NOS2	6	geneontology_Biological_Process	0.206896551724138
GO:0006352	DNA-templated transcription, initiation	6/29	231/17913	1.59722279091587e-06	1.15322795810428e-05	2.93571901030078e-06	JUN/TP53/MAPK3/ESR1/CREB1/CDKN1A	6	geneontology_Biological_Process	0.206896551724138
GO:0097305	response to alcohol	6/29	232/17913	1.63781158849082e-06	1.17947826799068e-05	3.00254320860279e-06	AKT1/FOS/IL2/CDKN1A/TGFB1/BCL2L1	6	geneontology_Biological_Process	0.206896551724138
GO:0001541	ovarian follicle development	4/29	54/17913	1.65628020347572e-06	1.18664599668042e-05	3.02078976361152e-06	ESR1/BCL2/BCL2L1/VEGFA	4	geneontology_Biological_Process	0.137931034482759
GO:1903078	positive regulation of protein localization to plasma membrane	4/29	54/17913	1.65628020347572e-06	1.18664599668042e-05	3.02078976361152e-06	AKT1/TNF/EGFR/IFNG	4	geneontology_Biological_Process	0.137931034482759
GO:0045787	positive regulation of cell cycle	7/29	373/17913	1.68678936524239e-06	1.20540563100783e-05	3.06854529601449e-06	TP53/AKT1/IL10/CDKN1A/EGFR/IL1B/TGFB1	7	geneontology_Biological_Process	0.241379310344828
GO:0032352	positive regulation of hormone metabolic process	3/29	15/17913	1.71325708871041e-06	1.21189023000912e-05	3.08505283940908e-06	TNF/IL1B/IFNG	3	geneontology_Biological_Process	0.103448275862069
GO:0034349	glial cell apoptotic process	3/29	15/17913	1.71325708871041e-06	1.21189023000912e-05	3.08505283940908e-06	TP53/CASP3/CCL2	3	geneontology_Biological_Process	0.103448275862069
GO:0042362	fat-soluble vitamin biosynthetic process	3/29	15/17913	1.71325708871041e-06	1.21189023000912e-05	3.08505283940908e-06	TNF/IL1B/IFNG	3	geneontology_Biological_Process	0.103448275862069
GO:0051044	positive regulation of membrane protein ectodomain proteolysis	3/29	15/17913	1.71325708871041e-06	1.21189023000912e-05	3.08505283940908e-06	TNF/IL1B/IFNG	3	geneontology_Biological_Process	0.103448275862069
GO:0014706	striated muscle tissue development	7/29	376/17913	1.77907160369835e-06	1.24003419207476e-05	3.15669762037425e-06	MAPK1/MAPK14/FOS/CREB1/BCL2/TGFB1/VEGFA	7	geneontology_Biological_Process	0.241379310344828
GO:0014013	regulation of gliogenesis	5/29	128/17913	1.78246264738495e-06	1.24003419207476e-05	3.15669762037425e-06	IL6/TNF/CREB1/IL1B/TGFB1	5	geneontology_Biological_Process	0.172413793103448
GO:0032355	response to estradiol	5/29	128/17913	1.78246264738495e-06	1.24003419207476e-05	3.15669762037425e-06	ESR1/IL10/CASP3/EGFR/TGFB1	5	geneontology_Biological_Process	0.172413793103448
GO:0002381	immunoglobulin production involved in immunoglobulin mediated immune response	4/29	55/17913	1.78418984937919e-06	1.24003419207476e-05	3.15669762037425e-06	IL10/IL2/IL4/TGFB1	4	geneontology_Biological_Process	0.137931034482759
GO:0010332	response to gamma radiation	4/29	55/17913	1.78418984937919e-06	1.24003419207476e-05	3.15669762037425e-06	TP53/CDKN1A/BCL2/BCL2L1	4	geneontology_Biological_Process	0.137931034482759
GO:0016445	somatic diversification of immunoglobulins	4/29	55/17913	1.78418984937919e-06	1.24003419207476e-05	3.15669762037425e-06	IL10/IL2/IL4/TGFB1	4	geneontology_Biological_Process	0.137931034482759
GO:0042306	regulation of protein import into nucleus	4/29	55/17913	1.78418984937919e-06	1.24003419207476e-05	3.15669762037425e-06	MAPK1/MAPK14/TGFB1/IFNG	4	geneontology_Biological_Process	0.137931034482759
GO:0072659	protein localization to plasma membrane	6/29	237/17913	1.85362649356749e-06	1.28508881531657e-05	3.27139108841186e-06	AKT1/TNF/EGFR/TGFB1/IFNG/BCL2L1	6	geneontology_Biological_Process	0.206896551724138
GO:0045765	regulation of angiogenesis	7/29	383/17913	2.01098785991704e-06	1.39072535126272e-05	3.54030512624809e-06	IL6/STAT1/IL10/SP1/IL1B/CXCL8/VEGFA	7	geneontology_Biological_Process	0.241379310344828
GO:0030072	peptide hormone secretion	6/29	241/17913	2.04255131025117e-06	1.40905705486881e-05	3.58697129523004e-06	IL6/TNF/EGFR/IL1B/IFNG/NOS2	6	geneontology_Biological_Process	0.206896551724138
GO:0060688	regulation of morphogenesis of a branching structure	4/29	57/17913	2.06183645837391e-06	1.41535423879017e-05	3.6030017447343e-06	ESR1/TNF/TGFB1/VEGFA	4	geneontology_Biological_Process	0.137931034482759
GO:1903428	positive regulation of reactive oxygen species biosynthetic process	4/29	57/17913	2.06183645837391e-06	1.41535423879017e-05	3.6030017447343e-06	AKT1/TNF/IL1B/IFNG	4	geneontology_Biological_Process	0.137931034482759
GO:0050715	positive regulation of cytokine secretion	5/29	132/17913	2.07466451005669e-06	1.42066093108796e-05	3.61651074557923e-06	MAPK3/MAPK14/TNF/IL10/IL1B	5	geneontology_Biological_Process	0.172413793103448
GO:0034116	positive regulation of heterotypic cell-cell adhesion	3/29	16/17913	2.10632906346652e-06	1.43529073346728e-05	3.65375315603251e-06	TNF/IL10/IL1B	3	geneontology_Biological_Process	0.103448275862069
GO:0060965	negative regulation of gene silencing by miRNA	3/29	16/17913	2.10632906346652e-06	1.43529073346728e-05	3.65375315603251e-06	TP53/ESR1/TGFB1	3	geneontology_Biological_Process	0.103448275862069
GO:0031330	negative regulation of cellular catabolic process	6/29	244/17913	2.19433755019237e-06	1.48798509790417e-05	3.78789475945616e-06	TP53/MAPK14/AKT1/IL10/MCL1/BCL2	6	geneontology_Biological_Process	0.206896551724138
GO:0045926	negative regulation of growth	6/29	244/17913	2.19433755019237e-06	1.48798509790417e-05	3.78789475945616e-06	TP53/TNF/IL10/CDKN1A/BCL2/TGFB1	6	geneontology_Biological_Process	0.206896551724138
GO:1904589	regulation of protein import	4/29	58/17913	2.21209202352179e-06	1.49638360911535e-05	3.80927446053573e-06	MAPK1/MAPK14/TGFB1/IFNG	4	geneontology_Biological_Process	0.137931034482759
GO:0009896	positive regulation of catabolic process	7/29	392/17913	2.34594603457815e-06	1.57926367110369e-05	4.02025839640395e-06	MAPK3/IL6/AKT1/TNF/IL4/IL1B/IFNG	7	geneontology_Biological_Process	0.241379310344828
GO:0060537	muscle tissue development	7/29	392/17913	2.34594603457815e-06	1.57926367110369e-05	4.02025839640395e-06	MAPK1/MAPK14/FOS/CREB1/BCL2/TGFB1/VEGFA	7	geneontology_Biological_Process	0.241379310344828
GO:0007611	learning or memory	6/29	247/17913	2.35522058946391e-06	1.58168669465926e-05	4.02642657526615e-06	JUN/MAPK1/FOS/CREB1/CASP3/EGFR	6	geneontology_Biological_Process	0.206896551724138
GO:2000027	regulation of animal organ morphogenesis	6/29	250/17913	2.52561559064297e-06	1.69139836417379e-05	4.30571449191975e-06	STAT1/ESR1/TNF/BCL2/TGFB1/VEGFA	6	geneontology_Biological_Process	0.206896551724138
GO:0002562	somatic diversification of immune receptors via germline recombination within a single locus	4/29	60/17913	2.53679410199011e-06	1.69139836417379e-05	4.30571449191975e-06	IL10/IL2/IL4/TGFB1	4	geneontology_Biological_Process	0.137931034482759
GO:0016444	somatic cell DNA recombination	4/29	60/17913	2.53679410199011e-06	1.69139836417379e-05	4.30571449191975e-06	IL10/IL2/IL4/TGFB1	4	geneontology_Biological_Process	0.137931034482759
GO:2001233	regulation of apoptotic signaling pathway	7/29	397/17913	2.5514129570644e-06	1.69535967958429e-05	4.31579862912323e-06	TP53/AKT1/TNF/IL1B/MCL1/BCL2/BCL2L1	7	geneontology_Biological_Process	0.241379310344828
GO:0032740	positive regulation of interleukin-17 production	3/29	17/17913	2.55490156234446e-06	1.69535967958429e-05	4.31579862912323e-06	IL6/IL2/TGFB1	3	geneontology_Biological_Process	0.103448275862069
GO:0014065	phosphatidylinositol 3-kinase signaling	5/29	138/17913	2.58237440205147e-06	1.70546859206575e-05	4.34153241951283e-06	MAPK3/MAPK1/AKT1/TNF/EGFR	5	geneontology_Biological_Process	0.172413793103448
GO:0031056	regulation of histone modification	5/29	138/17913	2.58237440205147e-06	1.70546859206575e-05	4.34153241951283e-06	TP53/MAPK3/IL1B/TGFB1/VEGFA	5	geneontology_Biological_Process	0.172413793103448
GO:0032386	regulation of intracellular transport	7/29	400/17913	2.68177535247599e-06	1.76692858329801e-05	4.49798827315869e-06	TP53/MAPK3/MAPK1/MAPK14/IL1B/TGFB1/IFNG	7	geneontology_Biological_Process	0.241379310344828
GO:1904377	positive regulation of protein localization to cell periphery	4/29	61/17913	2.71178304720591e-06	1.78248569635917e-05	4.53759129547365e-06	AKT1/TNF/EGFR/IFNG	4	geneontology_Biological_Process	0.137931034482759
GO:0034976	response to endoplasmic reticulum stress	6/29	254/17913	2.76834713651953e-06	1.80487307342377e-05	4.59458180457243e-06	JUN/TP53/BCL2/CXCL8/BCL2L1/CCL2	6	geneontology_Biological_Process	0.206896551724138
GO:0046883	regulation of hormone secretion	6/29	254/17913	2.76834713651953e-06	1.80487307342377e-05	4.59458180457243e-06	TNF/CREB1/EGFR/IL1B/IFNG/NOS2	6	geneontology_Biological_Process	0.206896551724138
GO:0034250	positive regulation of cellular amide metabolic process	5/29	140/17913	2.77172990606317e-06	1.80487307342377e-05	4.59458180457243e-06	MAPK3/MAPK1/IL6/TNF/CASP3	5	geneontology_Biological_Process	0.172413793103448
GO:0019216	regulation of lipid metabolic process	7/29	402/17913	2.77174623403434e-06	1.80487307342377e-05	4.59458180457243e-06	AKT1/TNF/CREB1/SP1/IL1B/TGFB1/IFNG	7	geneontology_Biological_Process	0.241379310344828
GO:0043434	response to peptide hormone	7/29	404/17913	2.86423131851814e-06	1.86042998246615e-05	4.73601045524214e-06	AKT1/STAT1/CREB1/IL10/SP1/IL1B/TGFB1	7	geneontology_Biological_Process	0.241379310344828
GO:0045807	positive regulation of endocytosis	5/29	141/17913	2.87041583229438e-06	1.86042998246615e-05	4.73601045524214e-06	TNF/IL4/IL1B/CCL2/VEGFA	5	geneontology_Biological_Process	0.172413793103448
GO:2001244	positive regulation of intrinsic apoptotic signaling pathway	4/29	62/17913	2.89556541439753e-06	1.87237605798745e-05	4.76642102650858e-06	TP53/MCL1/BCL2/BCL2L1	4	geneontology_Biological_Process	0.137931034482759
GO:0031065	positive regulation of histone deacetylation	3/29	18/17913	3.06254513049427e-06	1.96214098360633e-05	4.99493144090293e-06	TP53/TGFB1/VEGFA	3	geneontology_Biological_Process	0.103448275862069
GO:0035994	response to muscle stretch	3/29	18/17913	3.06254513049427e-06	1.96214098360633e-05	4.99493144090293e-06	JUN/MAPK14/FOS	3	geneontology_Biological_Process	0.103448275862069
GO:0038083	peptidyl-tyrosine autophosphorylation	3/29	18/17913	3.06254513049427e-06	1.96214098360633e-05	4.99493144090293e-06	MAPK3/EGFR/VEGFA	3	geneontology_Biological_Process	0.103448275862069
GO:0051023	regulation of immunoglobulin secretion	3/29	18/17913	3.06254513049427e-06	1.96214098360633e-05	4.99493144090293e-06	IL6/TNF/IL2	3	geneontology_Biological_Process	0.103448275862069
GO:0055025	positive regulation of cardiac muscle tissue development	4/29	63/17913	3.08842217654882e-06	1.9741817903765e-05	5.0255831651229e-06	MAPK1/MAPK14/CREB1/TGFB1	4	geneontology_Biological_Process	0.137931034482759
GO:0060135	maternal process involved in female pregnancy	4/29	64/17913	3.29063816392215e-06	2.0906647699729e-05	5.32210849229217e-06	MAPK3/MAPK1/AKT1/ESR1	4	geneontology_Biological_Process	0.137931034482759
GO:0002262	myeloid cell homeostasis	5/29	145/17913	3.29315333339829e-06	2.0906647699729e-05	5.32210849229217e-06	MAPK14/IL6/STAT1/CASP3/VEGFA	5	geneontology_Biological_Process	0.172413793103448
GO:0050806	positive regulation of synaptic transmission	5/29	145/17913	3.29315333339829e-06	2.0906647699729e-05	5.32210849229217e-06	MAPK1/TNF/CREB1/EGFR/CCL2	5	geneontology_Biological_Process	0.172413793103448
GO:0030100	regulation of endocytosis	6/29	262/17913	3.31107577036033e-06	2.09375733737797e-05	5.32998109792741e-06	TNF/IL4/IL1B/TGFB1/CCL2/VEGFA	6	geneontology_Biological_Process	0.206896551724138
GO:0060249	anatomical structure homeostasis	7/29	413/17913	3.31304982340755e-06	2.09375733737797e-05	5.32998109792741e-06	MAPK3/MAPK1/IL6/EGFR/BCL2/TGFB1/VEGFA	7	geneontology_Biological_Process	0.241379310344828
GO:0051146	striated muscle cell differentiation	6/29	263/17913	3.38462281805785e-06	2.13415017962155e-05	5.4328072859514e-06	MAPK14/AKT1/CASP3/BCL2/TGFB1/VEGFA	6	geneontology_Biological_Process	0.206896551724138
GO:0048754	branching morphogenesis of an epithelial tube	5/29	146/17913	3.40611545881425e-06	2.14285412724951e-05	5.4549645223733e-06	ESR1/TNF/BCL2/TGFB1/VEGFA	5	geneontology_Biological_Process	0.172413793103448
GO:0001933	negative regulation of protein phosphorylation	7/29	416/17913	3.47513922390813e-06	2.17890026393122e-05	5.54672550333179e-06	JUN/AKT1/IL2/CASP3/CDKN1A/IL1B/TGFB1	7	geneontology_Biological_Process	0.241379310344828
GO:0006801	superoxide metabolic process	4/29	65/17913	3.50250203889913e-06	2.17890026393122e-05	5.54672550333179e-06	TNF/EGFR/TGFB1/NOS2	4	geneontology_Biological_Process	0.137931034482759
GO:0032945	negative regulation of mononuclear cell proliferation	4/29	65/17913	3.50250203889913e-06	2.17890026393122e-05	5.54672550333179e-06	IL10/IL2/CASP3/TGFB1	4	geneontology_Biological_Process	0.137931034482759
GO:0050672	negative regulation of lymphocyte proliferation	4/29	65/17913	3.50250203889913e-06	2.17890026393122e-05	5.54672550333179e-06	IL10/IL2/CASP3/TGFB1	4	geneontology_Biological_Process	0.137931034482759
GO:0072577	endothelial cell apoptotic process	4/29	65/17913	3.50250203889913e-06	2.17890026393122e-05	5.54672550333179e-06	TNF/IL10/IL4/CCL2	4	geneontology_Biological_Process	0.137931034482759
GO:0000187	activation of MAPK activity	5/29	147/17913	3.52210272620556e-06	2.18621387481846e-05	5.56534342389532e-06	MAPK3/MAPK1/MAPK14/TNF/IL1B	5	geneontology_Biological_Process	0.172413793103448
GO:0060149	negative regulation of posttranscriptional gene silencing	3/29	19/17913	3.63281438359163e-06	2.23996762988271e-05	5.70218186898174e-06	TP53/ESR1/TGFB1	3	geneontology_Biological_Process	0.103448275862069
GO:0060252	positive regulation of glial cell proliferation	3/29	19/17913	3.63281438359163e-06	2.23996762988271e-05	5.70218186898174e-06	IL6/TNF/IL1B	3	geneontology_Biological_Process	0.103448275862069
GO:0060967	negative regulation of gene silencing by RNA	3/29	19/17913	3.63281438359163e-06	2.23996762988271e-05	5.70218186898174e-06	TP53/ESR1/TGFB1	3	geneontology_Biological_Process	0.103448275862069
GO:0016202	regulation of striated muscle tissue development	5/29	149/17913	3.76338610754753e-06	2.31025486381827e-05	5.88110882561334e-06	MAPK1/MAPK14/CREB1/BCL2/TGFB1	5	geneontology_Biological_Process	0.172413793103448
GO:0032635	interleukin-6 production	5/29	149/17913	3.76338610754753e-06	2.31025486381827e-05	5.88110882561334e-06	IL6/TNF/IL10/IL1B/NOS2	5	geneontology_Biological_Process	0.172413793103448
GO:0000082	G1/S transition of mitotic cell cycle	6/29	269/17913	3.85443426551277e-06	2.36094687867782e-05	6.01015314044097e-06	TP53/AKT1/CDKN1A/EGFR/BCL2/CCL2	6	geneontology_Biological_Process	0.206896551724138
GO:0002200	somatic diversification of immune receptors	4/29	67/17913	3.95634711145036e-06	2.40749768550483e-05	6.12865537374751e-06	IL10/IL2/IL4/TGFB1	4	geneontology_Biological_Process	0.137931034482759
GO:0061180	mammary gland epithelium development	4/29	67/17913	3.95634711145036e-06	2.40749768550483e-05	6.12865537374751e-06	MAPK1/AKT1/ESR1/TGFB1	4	geneontology_Biological_Process	0.137931034482759
GO:0070227	lymphocyte apoptotic process	4/29	67/17913	3.95634711145036e-06	2.40749768550483e-05	6.12865537374751e-06	TP53/AKT1/IL10/IL2	4	geneontology_Biological_Process	0.137931034482759
GO:1901342	regulation of vasculature development	7/29	425/17913	4.0017576130653e-06	2.42982537420762e-05	6.18549393694763e-06	IL6/STAT1/IL10/SP1/IL1B/CXCL8/VEGFA	7	geneontology_Biological_Process	0.241379310344828
GO:0070372	regulation of ERK1 and ERK2 cascade	6/29	271/17913	4.02235864439206e-06	2.43702468302624e-05	6.20382088402804e-06	JUN/MAPK3/TNF/EGFR/IL1B/TGFB1	6	geneontology_Biological_Process	0.206896551724138
GO:0031647	regulation of protein stability	6/29	272/17913	4.1085302360421e-06	2.48383378912133e-05	6.32298065782025e-06	TP53/MAPK1/CREB1/CASP3/CDKN1A/BCL2	6	geneontology_Biological_Process	0.206896551724138
GO:1901861	regulation of muscle tissue development	5/29	152/17913	4.14947625392288e-06	2.50315807785348e-05	6.37217360479385e-06	MAPK1/MAPK14/CREB1/BCL2/TGFB1	5	geneontology_Biological_Process	0.172413793103448
GO:1901990	regulation of mitotic cell cycle phase transition	7/29	428/17913	4.19147077301326e-06	2.5230300311853e-05	6.4227607161781e-06	TP53/AKT1/CDKN1A/EGFR/BCL2/TGFB1/CCL2	7	geneontology_Biological_Process	0.241379310344828
GO:0048634	regulation of muscle organ development	5/29	153/17913	4.28485983531613e-06	2.56264042082104e-05	6.52359505083142e-06	MAPK1/MAPK14/CREB1/BCL2/TGFB1	5	geneontology_Biological_Process	0.172413793103448
GO:0050729	positive regulation of inflammatory response	5/29	153/17913	4.28485983531613e-06	2.56264042082104e-05	6.52359505083142e-06	IL6/TNF/IL2/EGFR/IL1B	5	geneontology_Biological_Process	0.172413793103448
GO:0071346	cellular response to interferon-gamma	5/29	153/17913	4.28485983531613e-06	2.56264042082104e-05	6.52359505083142e-06	TP53/STAT1/IFNG/NOS2/CCL2	5	geneontology_Biological_Process	0.172413793103448
GO:0035051	cardiocyte differentiation	5/29	154/17913	4.42369001305411e-06	2.64000515340082e-05	6.72053886802316e-06	MAPK3/MAPK1/EGFR/TGFB1/VEGFA	5	geneontology_Biological_Process	0.172413793103448
GO:1990778	protein localization to cell periphery	6/29	276/17913	4.46840958267885e-06	2.6609951937876e-05	6.77397224184784e-06	AKT1/TNF/EGFR/TGFB1/IFNG/BCL2L1	6	geneontology_Biological_Process	0.206896551724138
GO:0023061	signal release	7/29	433/17913	4.52435480396605e-06	2.68856649011799e-05	6.84415921416926e-06	IL6/TNF/CREB1/EGFR/IL1B/IFNG/NOS2	7	geneontology_Biological_Process	0.241379310344828
GO:0071347	cellular response to interleukin-1	5/29	156/17913	4.71194251985858e-06	2.79408166017997e-05	7.11276429649425e-06	MAPK3/IL6/IL1B/CXCL8/CCL2	5	geneontology_Biological_Process	0.172413793103448
GO:0061564	axon development	7/29	438/17913	4.879051575249e-06	2.88703115503588e-05	7.34938152132714e-06	JUN/MAPK3/MAPK1/CREB1/CASP3/BCL2/VEGFA	7	geneontology_Biological_Process	0.241379310344828
GO:0062012	regulation of small molecule metabolic process	7/29	439/17913	4.9527067850376e-06	2.91725431263929e-05	7.42631921409128e-06	TP53/AKT1/TNF/SP1/IL1B/TGFB1/IFNG	7	geneontology_Biological_Process	0.241379310344828
GO:0010893	positive regulation of steroid biosynthetic process	3/29	21/17913	4.97536902897475e-06	2.91725431263929e-05	7.42631921409128e-06	TNF/IL1B/IFNG	3	geneontology_Biological_Process	0.103448275862069
GO:0035743	CD4-positive, alpha-beta T cell cytokine production	3/29	21/17913	4.97536902897475e-06	2.91725431263929e-05	7.42631921409128e-06	IL6/IL4/IL1B	3	geneontology_Biological_Process	0.103448275862069
GO:0060260	regulation of transcription initiation from RNA polymerase II promoter	3/29	21/17913	4.97536902897475e-06	2.91725431263929e-05	7.42631921409128e-06	TP53/ESR1/CREB1	3	geneontology_Biological_Process	0.103448275862069
GO:0002312	B cell activation involved in immune response	4/29	71/17913	4.99293256953333e-06	2.91725431263929e-05	7.42631921409128e-06	IL10/IL2/IL4/TGFB1	4	geneontology_Biological_Process	0.137931034482759
GO:0070664	negative regulation of leukocyte proliferation	4/29	71/17913	4.99293256953333e-06	2.91725431263929e-05	7.42631921409128e-06	IL10/IL2/CASP3/TGFB1	4	geneontology_Biological_Process	0.137931034482759
GO:0090068	positive regulation of cell cycle process	6/29	283/17913	5.15984961430838e-06	3.00847298641788e-05	7.65853036785697e-06	TP53/AKT1/CDKN1A/EGFR/IL1B/TGFB1	6	geneontology_Biological_Process	0.206896551724138
GO:0048015	phosphatidylinositol-mediated signaling	5/29	160/17913	5.33262106549533e-06	3.10271710011179e-05	7.89844324391572e-06	MAPK3/MAPK1/AKT1/TNF/EGFR	5	geneontology_Biological_Process	0.172413793103448
GO:0051235	maintenance of location	6/29	286/17913	5.48168509587246e-06	3.18280340879095e-05	8.10231525135535e-06	IL6/AKT1/TNF/IL10/IL1B/TGFB1	6	geneontology_Biological_Process	0.206896551724138
GO:0001667	ameboidal-type cell migration	7/29	446/17913	5.49476237217869e-06	3.18376356159294e-05	8.10475946788148e-06	JUN/AKT1/SP1/IL4/TGFB1/IFNG/VEGFA	7	geneontology_Biological_Process	0.241379310344828
GO:0044843	cell cycle G1/S phase transition	6/29	288/17913	5.70518247301222e-06	3.29882646312968e-05	8.39766976809399e-06	TP53/AKT1/CDKN1A/EGFR/BCL2/CCL2	6	geneontology_Biological_Process	0.206896551724138
GO:0009110	vitamin biosynthetic process	3/29	22/17913	5.75468440840981e-06	3.3000628490202e-05	8.40081717840202e-06	TNF/IL1B/IFNG	3	geneontology_Biological_Process	0.103448275862069
GO:0042359	vitamin D metabolic process	3/29	22/17913	5.75468440840981e-06	3.3000628490202e-05	8.40081717840202e-06	TNF/IL1B/IFNG	3	geneontology_Biological_Process	0.103448275862069
GO:0048305	immunoglobulin secretion	3/29	22/17913	5.75468440840981e-06	3.3000628490202e-05	8.40081717840202e-06	IL6/TNF/IL2	3	geneontology_Biological_Process	0.103448275862069
GO:0050995	negative regulation of lipid catabolic process	3/29	22/17913	5.75468440840981e-06	3.3000628490202e-05	8.40081717840202e-06	AKT1/TNF/IL1B	3	geneontology_Biological_Process	0.103448275862069
GO:0048017	inositol lipid-mediated signaling	5/29	163/17913	5.83886665586381e-06	3.33461503481402e-05	8.48877507776577e-06	MAPK3/MAPK1/AKT1/TNF/EGFR	5	geneontology_Biological_Process	0.172413793103448
GO:2001242	regulation of intrinsic apoptotic signaling pathway	5/29	163/17913	5.83886665586381e-06	3.33461503481402e-05	8.48877507776577e-06	TP53/AKT1/MCL1/BCL2/BCL2L1	5	geneontology_Biological_Process	0.172413793103448
GO:1902275	regulation of chromatin organization	5/29	165/17913	6.19678353083214e-06	3.53178644180556e-05	8.99070519810755e-06	TP53/MAPK3/IL1B/TGFB1/VEGFA	5	geneontology_Biological_Process	0.172413793103448
GO:0031100	animal organ regeneration	4/29	75/17913	6.21797036905176e-06	3.53662926909127e-05	9.0030333592715e-06	IL10/CDKN1A/EGFR/TGFB1	4	geneontology_Biological_Process	0.137931034482759
GO:0042326	negative regulation of phosphorylation	7/29	455/17913	6.26367825786299e-06	3.54814457411873e-05	9.03234733803948e-06	JUN/AKT1/IL2/CASP3/CDKN1A/IL1B/TGFB1	7	geneontology_Biological_Process	0.241379310344828
GO:0050769	positive regulation of neurogenesis	7/29	455/17913	6.26367825786299e-06	3.54814457411873e-05	9.03234733803948e-06	IL6/TNF/IL2/IL1B/BCL2/TGFB1/VEGFA	7	geneontology_Biological_Process	0.241379310344828
GO:0016241	regulation of macroautophagy	5/29	166/17913	6.38207742452185e-06	3.60057687897619e-05	9.16582182852702e-06	TP53/MAPK3/AKT1/CASP3/IL4	5	geneontology_Biological_Process	0.172413793103448
GO:0030307	positive regulation of cell growth	5/29	166/17913	6.38207742452185e-06	3.60057687897619e-05	9.16582182852702e-06	AKT1/IL2/EGFR/BCL2/VEGFA	5	geneontology_Biological_Process	0.172413793103448
GO:0014015	positive regulation of gliogenesis	4/29	76/17913	6.55608379138346e-06	3.69127384375469e-05	9.39670489184998e-06	IL6/TNF/IL1B/TGFB1	4	geneontology_Biological_Process	0.137931034482759
GO:2000637	positive regulation of gene silencing by miRNA	3/29	23/17913	6.61068553629356e-06	3.71451221565528e-05	9.45586173909564e-06	TP53/EGFR/TGFB1	3	geneontology_Biological_Process	0.103448275862069
GO:0071375	cellular response to peptide hormone stimulus	6/29	297/17913	6.80473385111811e-06	3.81585377124068e-05	9.71384224431559e-06	AKT1/STAT1/CREB1/SP1/IL1B/TGFB1	6	geneontology_Biological_Process	0.206896551724138
GO:0072088	nephron epithelium morphogenesis	4/29	77/17913	6.90759891745396e-06	3.86575867127393e-05	9.84088283737892e-06	STAT1/BCL2/TGFB1/VEGFA	4	geneontology_Biological_Process	0.137931034482759
GO:0022408	negative regulation of cell-cell adhesion	5/29	169/17913	6.96415792879654e-06	3.88960083117354e-05	9.901576719774e-06	AKT1/IL10/IL2/CASP3/TGFB1	5	geneontology_Biological_Process	0.172413793103448
GO:1901987	regulation of cell cycle phase transition	7/29	464/17913	7.12038038571167e-06	3.96890002699568e-05	1.01034450104625e-05	TP53/AKT1/CDKN1A/EGFR/BCL2/TGFB1/CCL2	7	geneontology_Biological_Process	0.241379310344828
GO:0048771	tissue remodeling	5/29	170/17913	7.16715987224545e-06	3.97905867807731e-05	1.01293054181032e-05	TP53/IL6/IL2/EGFR/TGFB1	5	geneontology_Biological_Process	0.172413793103448
GO:0097529	myeloid leukocyte migration	5/29	170/17913	7.16715987224545e-06	3.97905867807731e-05	1.01293054181032e-05	MAPK3/MAPK14/IL6/CXCL8/CCL2	5	geneontology_Biological_Process	0.172413793103448
GO:0010827	regulation of glucose transmembrane transport	4/29	78/17913	7.27285197769651e-06	4.02970943575352e-05	1.02582447064297e-05	MAPK14/AKT1/TNF/IL1B	4	geneontology_Biological_Process	0.137931034482759
GO:0016064	immunoglobulin mediated immune response	5/29	171/17913	7.37477222237813e-06	4.07807344916029e-05	1.0381362735762e-05	TNF/IL10/IL2/IL4/TGFB1	5	geneontology_Biological_Process	0.172413793103448
GO:0060148	positive regulation of posttranscriptional gene silencing	3/29	24/17913	7.54684805170749e-06	4.15673231622703e-05	1.05816009711896e-05	TP53/EGFR/TGFB1	3	geneontology_Biological_Process	0.103448275862069
GO:0150078	positive regulation of neuroinflammatory response	3/29	24/17913	7.54684805170749e-06	4.15673231622703e-05	1.05816009711896e-05	IL6/TNF/IL1B	3	geneontology_Biological_Process	0.103448275862069
GO:0006476	protein deacetylation	4/29	79/17913	7.65218269163187e-06	4.18990828321769e-05	1.06660554940748e-05	TP53/TGFB1/IFNG/VEGFA	4	geneontology_Biological_Process	0.137931034482759
GO:0032642	regulation of chemokine production	4/29	79/17913	7.65218269163187e-06	4.18990828321769e-05	1.06660554940748e-05	IL6/TNF/IL10/IL1B	4	geneontology_Biological_Process	0.137931034482759
GO:0072028	nephron morphogenesis	4/29	79/17913	7.65218269163187e-06	4.18990828321769e-05	1.06660554940748e-05	STAT1/BCL2/TGFB1/VEGFA	4	geneontology_Biological_Process	0.137931034482759
GO:0019724	B cell mediated immunity	5/29	173/17913	7.80412795656211e-06	4.2480673076052e-05	1.08141082292822e-05	TNF/IL10/IL2/IL4/TGFB1	5	geneontology_Biological_Process	0.172413793103448
GO:0034341	response to interferon-gamma	5/29	173/17913	7.80412795656211e-06	4.2480673076052e-05	1.08141082292822e-05	TP53/STAT1/IFNG/NOS2/CCL2	5	geneontology_Biological_Process	0.172413793103448
GO:0071478	cellular response to radiation	5/29	173/17913	7.80412795656211e-06	4.2480673076052e-05	1.08141082292822e-05	TP53/MAPK14/CDKN1A/TGFB1/BCL2L1	5	geneontology_Biological_Process	0.172413793103448
GO:0048871	multicellular organismal homeostasis	7/29	472/17913	7.96188018213596e-06	4.32548929193234e-05	1.10111977895961e-05	IL6/TNF/IL4/EGFR/IL1B/BCL2/VEGFA	7	geneontology_Biological_Process	0.241379310344828
GO:0032637	interleukin-8 production	4/29	80/17913	8.0459342440137e-06	4.354178395741e-05	1.10842303126525e-05	TNF/IL10/IL1B/NOS2	4	geneontology_Biological_Process	0.137931034482759
GO:0043536	positive regulation of blood vessel endothelial cell migration	4/29	80/17913	8.0459342440137e-06	4.354178395741e-05	1.10842303126525e-05	AKT1/SP1/TGFB1/VEGFA	4	geneontology_Biological_Process	0.137931034482759
GO:0006909	phagocytosis	6/29	308/17913	8.37661435557648e-06	4.52434577693637e-05	1.15174175350032e-05	MAPK3/MAPK1/TNF/IL1B/TGFB1/CCL2	6	geneontology_Biological_Process	0.206896551724138
GO:0002690	positive regulation of leukocyte chemotaxis	4/29	81/17913	8.45445326105949e-06	4.54875699586348e-05	1.15795600446131e-05	MAPK3/MAPK14/IL6/CXCL8	4	geneontology_Biological_Process	0.137931034482759
GO:1902930	regulation of alcohol biosynthetic process	4/29	81/17913	8.45445326105949e-06	4.54875699586348e-05	1.15795600446131e-05	TNF/SP1/IL1B/IFNG	4	geneontology_Biological_Process	0.137931034482759
GO:0002719	negative regulation of cytokine production involved in immune response	3/29	25/17913	8.56663193186777e-06	4.58257259004136e-05	1.16656428368095e-05	TNF/IL10/TGFB1	3	geneontology_Biological_Process	0.103448275862069
GO:0045830	positive regulation of isotype switching	3/29	25/17913	8.56663193186777e-06	4.58257259004136e-05	1.16656428368095e-05	IL2/IL4/TGFB1	3	geneontology_Biological_Process	0.103448275862069
GO:0070897	transcription preinitiation complex assembly	3/29	25/17913	8.56663193186777e-06	4.58257259004136e-05	1.16656428368095e-05	TP53/ESR1/CREB1	3	geneontology_Biological_Process	0.103448275862069
GO:0043112	receptor metabolic process	5/29	177/17913	8.72150217760953e-06	4.65648018563175e-05	1.18537859804574e-05	TNF/IL10/CXCL8/TGFB1/VEGFA	5	geneontology_Biological_Process	0.172413793103448
GO:0033044	regulation of chromosome organization	6/29	311/17913	8.8529295087408e-06	4.7176127229179e-05	1.20094082497561e-05	TP53/MAPK3/MAPK1/IL1B/TGFB1/VEGFA	6	geneontology_Biological_Process	0.206896551724138
GO:0006970	response to osmotic stress	4/29	82/17913	8.87808978676611e-06	4.72199164803763e-05	1.2020555476658e-05	TP53/TNF/CASP3/EGFR	4	geneontology_Biological_Process	0.137931034482759
GO:0035265	organ growth	5/29	179/17913	9.21076849184334e-06	4.88960224509855e-05	1.24472340120349e-05	MAPK1/MAPK14/AKT1/ESR1/BCL2	5	geneontology_Biological_Process	0.172413793103448
GO:0000079	regulation of cyclin-dependent protein serine/threonine kinase activity	4/29	83/17913	9.31719725931039e-06	4.92732993580608e-05	1.2543275647209e-05	AKT1/CASP3/CDKN1A/EGFR	4	geneontology_Biological_Process	0.137931034482759
GO:0045582	positive regulation of T cell differentiation	4/29	83/17913	9.31719725931039e-06	4.92732993580608e-05	1.2543275647209e-05	IL2/IL4/TGFB1/IFNG	4	geneontology_Biological_Process	0.137931034482759
GO:0043902	positive regulation of multi-organism process	5/29	180/17913	9.46332506788672e-06	4.99513010685612e-05	1.27158714030216e-05	JUN/MAPK3/SP1/IFNG/NOS2	5	geneontology_Biological_Process	0.172413793103448
GO:0002360	T cell lineage commitment	3/29	26/17913	9.67348153637697e-06	5.07721149564645e-05	1.29248221935139e-05	TP53/IL6/BCL2	3	geneontology_Biological_Process	0.103448275862069
GO:0034114	regulation of heterotypic cell-cell adhesion	3/29	26/17913	9.67348153637697e-06	5.07721149564645e-05	1.29248221935139e-05	TNF/IL10/IL1B	3	geneontology_Biological_Process	0.103448275862069
GO:0060969	negative regulation of gene silencing	3/29	26/17913	9.67348153637697e-06	5.07721149564645e-05	1.29248221935139e-05	TP53/ESR1/TGFB1	3	geneontology_Biological_Process	0.103448275862069
GO:1905330	regulation of morphogenesis of an epithelium	5/29	181/17913	9.7212719853338e-06	5.09270395171528e-05	1.29642606215176e-05	STAT1/ESR1/TNF/TGFB1/VEGFA	5	geneontology_Biological_Process	0.172413793103448
GO:0000018	regulation of DNA recombination	4/29	84/17913	9.77213248753396e-06	5.10974357274993e-05	1.300763759573e-05	IL10/IL2/IL4/TGFB1	4	geneontology_Biological_Process	0.137931034482759
GO:0010721	negative regulation of cell development	6/29	317/17913	9.87163392072718e-06	5.15210556873907e-05	1.31154765672583e-05	TP53/IL6/TNF/IL1B/BCL2/TGFB1	6	geneontology_Biological_Process	0.206896551724138
GO:0070555	response to interleukin-1	5/29	183/17913	1.0253665369737e-05	5.34148885709477e-05	1.3597580834634e-05	MAPK3/IL6/IL1B/CXCL8/CCL2	5	geneontology_Biological_Process	0.172413793103448
GO:0007179	transforming growth factor beta receptor signaling pathway	5/29	184/17913	1.05282779113366e-05	5.47431166770433e-05	1.39357017129633e-05	JUN/TP53/FOS/CREB1/TGFB1	5	geneontology_Biological_Process	0.172413793103448
GO:0001505	regulation of neurotransmitter levels	6/29	321/17913	1.06021575057788e-05	5.49223289379286e-05	1.39813229483368e-05	AKT1/TNF/IL10/IL1B/IFNG/NOS2	6	geneontology_Biological_Process	0.206896551724138
GO:0008202	steroid metabolic process	6/29	321/17913	1.06021575057788e-05	5.49223289379286e-05	1.39813229483368e-05	ESR1/TNF/SP1/IL4/IL1B/IFNG	6	geneontology_Biological_Process	0.206896551724138
GO:0032602	chemokine production	4/29	86/17913	1.0730930159208e-05	5.54862752387989e-05	1.41248841466774e-05	IL6/TNF/IL10/IL1B	4	geneontology_Biological_Process	0.137931034482759
GO:0046885	regulation of hormone biosynthetic process	3/29	27/17913	1.08708256513758e-05	5.61055390562671e-05	1.4282527269059e-05	TNF/IL1B/IFNG	3	geneontology_Biological_Process	0.103448275862069
GO:0070374	positive regulation of ERK1 and ERK2 cascade	5/29	186/17913	1.109475532785e-05	5.71554216242478e-05	1.45497910126879e-05	JUN/MAPK3/TNF/EGFR/TGFB1	5	geneontology_Biological_Process	0.172413793103448
GO:0001892	embryonic placenta development	4/29	87/17913	1.1235522863208e-05	5.75614011392658e-05	1.46531393378525e-05	MAPK1/AKT1/IL10/EGFR	4	geneontology_Biological_Process	0.137931034482759
GO:0035601	protein deacylation	4/29	87/17913	1.1235522863208e-05	5.75614011392658e-05	1.46531393378525e-05	TP53/TGFB1/IFNG/VEGFA	4	geneontology_Biological_Process	0.137931034482759
GO:1904029	regulation of cyclin-dependent protein kinase activity	4/29	87/17913	1.1235522863208e-05	5.75614011392658e-05	1.46531393378525e-05	AKT1/CASP3/CDKN1A/EGFR	4	geneontology_Biological_Process	0.137931034482759
GO:1901615	organic hydroxy compound metabolic process	7/29	500/17913	1.15884241681417e-05	5.92604369846071e-05	1.50856550252583e-05	TP53/TNF/SP1/IL4/IL1B/BCL2/IFNG	7	geneontology_Biological_Process	0.241379310344828
GO:0002286	T cell activation involved in immune response	4/29	88/17913	1.17574037975439e-05	5.9469844616615e-05	1.51389629564325e-05	TP53/IL6/IL2/IFNG	4	geneontology_Biological_Process	0.137931034482759
GO:0098732	macromolecule deacylation	4/29	88/17913	1.17574037975439e-05	5.9469844616615e-05	1.51389629564325e-05	TP53/TGFB1/IFNG/VEGFA	4	geneontology_Biological_Process	0.137931034482759
GO:1900407	regulation of cellular response to oxidative stress	4/29	88/17913	1.17574037975439e-05	5.9469844616615e-05	1.51389629564325e-05	AKT1/TNF/IL10/MCL1	4	geneontology_Biological_Process	0.137931034482759
GO:1904035	regulation of epithelial cell apoptotic process	4/29	88/17913	1.17574037975439e-05	5.9469844616615e-05	1.51389629564325e-05	IL6/TNF/IL4/CCL2	4	geneontology_Biological_Process	0.137931034482759
GO:1904705	regulation of vascular smooth muscle cell proliferation	4/29	88/17913	1.17574037975439e-05	5.9469844616615e-05	1.51389629564325e-05	JUN/TNF/IL10/CDKN1A	4	geneontology_Biological_Process	0.137931034482759
GO:1990874	vascular smooth muscle cell proliferation	4/29	88/17913	1.17574037975439e-05	5.9469844616615e-05	1.51389629564325e-05	JUN/TNF/IL10/CDKN1A	4	geneontology_Biological_Process	0.137931034482759
GO:0001773	myeloid dendritic cell activation	3/29	28/17913	1.21620775335958e-05	6.09635073491575e-05	1.55191977615365e-05	IL10/IL4/TGFB1	3	geneontology_Biological_Process	0.103448275862069
GO:0010165	response to X-ray	3/29	28/17913	1.21620775335958e-05	6.09635073491575e-05	1.55191977615365e-05	TP53/CASP3/CDKN1A	3	geneontology_Biological_Process	0.103448275862069
GO:0031063	regulation of histone deacetylation	3/29	28/17913	1.21620775335958e-05	6.09635073491575e-05	1.55191977615365e-05	TP53/TGFB1/VEGFA	3	geneontology_Biological_Process	0.103448275862069
GO:0035066	positive regulation of histone acetylation	3/29	28/17913	1.21620775335958e-05	6.09635073491575e-05	1.55191977615365e-05	MAPK3/IL1B/TGFB1	3	geneontology_Biological_Process	0.103448275862069
GO:1902932	positive regulation of alcohol biosynthetic process	3/29	28/17913	1.21620775335958e-05	6.09635073491575e-05	1.55191977615365e-05	TNF/IL1B/IFNG	3	geneontology_Biological_Process	0.103448275862069
GO:0042102	positive regulation of T cell proliferation	4/29	90/17913	1.2854526838081e-05	6.42035238310606e-05	1.6343993753757e-05	IL6/IL2/IL4/IL1B	4	geneontology_Biological_Process	0.137931034482759
GO:0050764	regulation of phagocytosis	4/29	90/17913	1.2854526838081e-05	6.42035238310606e-05	1.6343993753757e-05	TNF/IL1B/TGFB1/CCL2	4	geneontology_Biological_Process	0.137931034482759
GO:0045862	positive regulation of proteolysis	6/29	333/17913	1.30611849619028e-05	6.51190026633688e-05	1.65770429607805e-05	MAPK3/MAPK14/AKT1/TNF/IL1B/IFNG	6	geneontology_Biological_Process	0.206896551724138
GO:0010575	positive regulation of vascular endothelial growth factor production	3/29	29/17913	1.35506349543135e-05	6.70792533173566e-05	1.70760548924134e-05	IL6/IL1B/TGFB1	3	geneontology_Biological_Process	0.103448275862069
GO:0045940	positive regulation of steroid metabolic process	3/29	29/17913	1.35506349543135e-05	6.70792533173566e-05	1.70760548924134e-05	TNF/IL1B/IFNG	3	geneontology_Biological_Process	0.103448275862069
GO:0071480	cellular response to gamma radiation	3/29	29/17913	1.35506349543135e-05	6.70792533173566e-05	1.70760548924134e-05	TP53/CDKN1A/BCL2L1	3	geneontology_Biological_Process	0.103448275862069
GO:1900117	regulation of execution phase of apoptosis	3/29	29/17913	1.35506349543135e-05	6.70792533173566e-05	1.70760548924134e-05	TP53/IL6/BCL2L1	3	geneontology_Biological_Process	0.103448275862069
GO:0036473	cell death in response to oxidative stress	4/29	92/17913	1.40253244183967e-05	6.93059914079284e-05	1.76429052967514e-05	AKT1/IL10/MCL1/BCL2	4	geneontology_Biological_Process	0.137931034482759
GO:0032649	regulation of interferon-gamma production	4/29	93/17913	1.46393104733835e-05	7.18859859301772e-05	1.82996825550732e-05	TNF/IL10/IL2/IL1B	4	geneontology_Biological_Process	0.137931034482759
GO:0045621	positive regulation of lymphocyte differentiation	4/29	93/17913	1.46393104733835e-05	7.18859859301772e-05	1.82996825550732e-05	IL2/IL4/TGFB1/IFNG	4	geneontology_Biological_Process	0.137931034482759
GO:0072080	nephron tubule development	4/29	93/17913	1.46393104733835e-05	7.18859859301772e-05	1.82996825550732e-05	STAT1/BCL2/TGFB1/VEGFA	4	geneontology_Biological_Process	0.137931034482759
GO:0000075	cell cycle checkpoint	5/29	197/17913	1.46506063897885e-05	7.18859859301772e-05	1.82996825550732e-05	TP53/MAPK14/CDKN1A/TGFB1/BCL2L1	5	geneontology_Biological_Process	0.172413793103448
GO:0090276	regulation of peptide hormone secretion	5/29	199/17913	1.53830145028206e-05	7.53470323714606e-05	1.91807451205274e-05	TNF/EGFR/IL1B/IFNG/NOS2	5	geneontology_Biological_Process	0.172413793103448
GO:0050810	regulation of steroid biosynthetic process	4/29	95/17913	1.59264032933472e-05	7.75994510114663e-05	1.97541329034156e-05	TNF/SP1/IL1B/IFNG	4	geneontology_Biological_Process	0.137931034482759
GO:0060993	kidney morphogenesis	4/29	95/17913	1.59264032933472e-05	7.75994510114663e-05	1.97541329034156e-05	STAT1/BCL2/TGFB1/VEGFA	4	geneontology_Biological_Process	0.137931034482759
GO:0061326	renal tubule development	4/29	95/17913	1.59264032933472e-05	7.75994510114663e-05	1.97541329034156e-05	STAT1/BCL2/TGFB1/VEGFA	4	geneontology_Biological_Process	0.137931034482759
GO:0007623	circadian rhythm	5/29	201/17913	1.61437124853395e-05	7.82478725158979e-05	1.99191985631466e-05	JUN/TP53/CREB1/EGFR/NOS2	5	geneontology_Biological_Process	0.172413793103448
GO:0050707	regulation of cytokine secretion	5/29	201/17913	1.61437124853395e-05	7.82478725158979e-05	1.99191985631466e-05	MAPK3/MAPK14/TNF/IL10/IL1B	5	geneontology_Biological_Process	0.172413793103448
GO:2001020	regulation of response to DNA damage stimulus	5/29	201/17913	1.61437124853395e-05	7.82478725158979e-05	1.99191985631466e-05	TP53/EGFR/MCL1/BCL2/BCL2L1	5	geneontology_Biological_Process	0.172413793103448
GO:0002675	positive regulation of acute inflammatory response	3/29	31/17913	1.6633180332099e-05	8.02018574144633e-05	2.04166154504365e-05	IL6/TNF/IL1B	3	geneontology_Biological_Process	0.103448275862069
GO:1902692	regulation of neuroblast proliferation	3/29	31/17913	1.6633180332099e-05	8.02018574144633e-05	2.04166154504365e-05	TP53/TGFB1/VEGFA	3	geneontology_Biological_Process	0.103448275862069
GO:2000758	positive regulation of peptidyl-lysine acetylation	3/29	31/17913	1.6633180332099e-05	8.02018574144633e-05	2.04166154504365e-05	MAPK3/IL1B/TGFB1	3	geneontology_Biological_Process	0.103448275862069
GO:0045766	positive regulation of angiogenesis	5/29	203/17913	1.69334704019478e-05	8.15087772197384e-05	2.07493119732985e-05	IL10/SP1/IL1B/CXCL8/VEGFA	5	geneontology_Biological_Process	0.172413793103448
GO:1902882	regulation of response to oxidative stress	4/29	97/17913	1.72949548998069e-05	8.31052401823481e-05	2.11557161569326e-05	AKT1/TNF/IL10/MCL1	4	geneontology_Biological_Process	0.137931034482759
GO:0097421	liver regeneration	3/29	32/17913	1.83338867986408e-05	8.77947465769966e-05	2.23495020840729e-05	IL10/EGFR/TGFB1	3	geneontology_Biological_Process	0.103448275862069
GO:1904031	positive regulation of cyclin-dependent protein kinase activity	3/29	32/17913	1.83338867986408e-05	8.77947465769966e-05	2.23495020840729e-05	AKT1/CDKN1A/EGFR	3	geneontology_Biological_Process	0.103448275862069
GO:0046632	alpha-beta T cell differentiation	4/29	99/17913	1.87481656540955e-05	8.96245929296127e-05	2.28153175965702e-05	IL6/IL2/BCL2/IFNG	4	geneontology_Biological_Process	0.137931034482759
GO:0046777	protein autophosphorylation	5/29	210/17913	1.99378670277425e-05	9.51486907642438e-05	2.42215616018357e-05	JUN/MAPK3/AKT1/EGFR/VEGFA	5	geneontology_Biological_Process	0.172413793103448
GO:0042692	muscle cell differentiation	6/29	359/17913	1.99881613805753e-05	9.52256508848948e-05	2.42411529833698e-05	MAPK14/AKT1/CASP3/BCL2/TGFB1/VEGFA	6	geneontology_Biological_Process	0.206896551724138
GO:0045589	regulation of regulatory T cell differentiation	3/29	33/17913	2.01453359098453e-05	9.58106675439229e-05	2.4390077965216e-05	IL2/TGFB1/IFNG	3	geneontology_Biological_Process	0.103448275862069
GO:0018107	peptidyl-threonine phosphorylation	4/29	101/17913	2.02892843649997e-05	9.60037954588355e-05	2.44392416441958e-05	MAPK1/AKT1/BCL2/TGFB1	4	geneontology_Biological_Process	0.137931034482759
GO:0019233	sensory perception of pain	4/29	101/17913	2.02892843649997e-05	9.60037954588355e-05	2.44392416441958e-05	MAPK3/MAPK1/IL10/CCL2	4	geneontology_Biological_Process	0.137931034482759
GO:0055024	regulation of cardiac muscle tissue development	4/29	101/17913	2.02892843649997e-05	9.60037954588355e-05	2.44392416441958e-05	MAPK1/MAPK14/CREB1/TGFB1	4	geneontology_Biological_Process	0.137931034482759
GO:0007435	salivary gland morphogenesis	3/29	34/17913	2.20708486655601e-05	0.000103729266831224	2.64058791170454e-05	TNF/EGFR/TGFB1	3	geneontology_Biological_Process	0.103448275862069
GO:0010574	regulation of vascular endothelial growth factor production	3/29	34/17913	2.20708486655601e-05	0.000103729266831224	2.64058791170454e-05	IL6/IL1B/TGFB1	3	geneontology_Biological_Process	0.103448275862069
GO:0043276	anoikis	3/29	34/17913	2.20708486655601e-05	0.000103729266831224	2.64058791170454e-05	AKT1/MCL1/BCL2	3	geneontology_Biological_Process	0.103448275862069
GO:0071392	cellular response to estradiol stimulus	3/29	34/17913	2.20708486655601e-05	0.000103729266831224	2.64058791170454e-05	ESR1/IL10/EGFR	3	geneontology_Biological_Process	0.103448275862069
GO:0007584	response to nutrient	5/29	215/17913	2.23269005146276e-05	0.000104756013020652	2.66672531399238e-05	STAT1/CREB1/EGFR/IL1B/TGFB1	5	geneontology_Biological_Process	0.172413793103448
GO:0050868	negative regulation of T cell activation	4/29	104/17913	2.2773013927525e-05	0.000106669562715987	2.71543766247711e-05	IL10/IL2/CASP3/TGFB1	4	geneontology_Biological_Process	0.137931034482759
GO:0008406	gonad development	5/29	217/17913	2.33426408521638e-05	0.000109154261837216	2.77868949741406e-05	ESR1/CASP3/BCL2/BCL2L1/VEGFA	5	geneontology_Biological_Process	0.172413793103448
GO:0032609	interferon-gamma production	4/29	105/17913	2.3648478880801e-05	0.000110399180302835	2.81038081030766e-05	TNF/IL10/IL2/IL1B	4	geneontology_Biological_Process	0.137931034482759
GO:0001893	maternal placenta development	3/29	35/17913	2.41137308418292e-05	0.000111266503073142	2.83245984443933e-05	MAPK3/MAPK1/AKT1	3	geneontology_Biological_Process	0.103448275862069
GO:0002701	negative regulation of production of molecular mediator of immune response	3/29	35/17913	2.41137308418292e-05	0.000111266503073142	2.83245984443933e-05	TNF/IL10/TGFB1	3	geneontology_Biological_Process	0.103448275862069
GO:0042092	type 2 immune response	3/29	35/17913	2.41137308418292e-05	0.000111266503073142	2.83245984443933e-05	IL6/IL10/IL4	3	geneontology_Biological_Process	0.103448275862069
GO:0045066	regulatory T cell differentiation	3/29	35/17913	2.41137308418292e-05	0.000111266503073142	2.83245984443933e-05	IL2/TGFB1/IFNG	3	geneontology_Biological_Process	0.103448275862069
GO:0048246	macrophage chemotaxis	3/29	35/17913	2.41137308418292e-05	0.000111266503073142	2.83245984443933e-05	MAPK3/MAPK14/CCL2	3	geneontology_Biological_Process	0.103448275862069
GO:0090322	regulation of superoxide metabolic process	3/29	35/17913	2.41137308418292e-05	0.000111266503073142	2.83245984443933e-05	TNF/EGFR/TGFB1	3	geneontology_Biological_Process	0.103448275862069
GO:0110111	negative regulation of animal organ morphogenesis	3/29	35/17913	2.41137308418292e-05	0.000111266503073142	2.83245984443933e-05	STAT1/TNF/BCL2	3	geneontology_Biological_Process	0.103448275862069
GO:0009266	response to temperature stimulus	5/29	219/17913	2.43940312282855e-05	0.00011237382650121	2.86064846417824e-05	MAPK3/MAPK1/AKT1/FOS/CDKN1A	5	geneontology_Biological_Process	0.172413793103448
GO:2000278	regulation of DNA biosynthetic process	4/29	106/17913	2.45484276220208e-05	0.000112898461687412	2.87400385917005e-05	TP53/MAPK3/MAPK1/CDKN1A	4	geneontology_Biological_Process	0.137931034482759
GO:1904659	glucose transmembrane transport	4/29	107/17913	2.54732881861467e-05	0.000116806238268873	2.9734823180262e-05	MAPK14/AKT1/TNF/IL1B	4	geneontology_Biological_Process	0.137931034482759
GO:0048738	cardiac muscle tissue development	5/29	221/17913	2.54819493604144e-05	0.000116806238268873	2.9734823180262e-05	MAPK1/MAPK14/CREB1/TGFB1/VEGFA	5	geneontology_Biological_Process	0.172413793103448
GO:0010573	vascular endothelial growth factor production	3/29	36/17913	2.6277273034157e-05	0.000120056983518353	3.05623503451628e-05	IL6/IL1B/TGFB1	3	geneontology_Biological_Process	0.103448275862069
GO:0045911	positive regulation of DNA recombination	3/29	36/17913	2.6277273034157e-05	0.000120056983518353	3.05623503451628e-05	IL2/IL4/TGFB1	3	geneontology_Biological_Process	0.103448275862069
GO:0045137	development of primary sexual characteristics	5/29	223/17913	2.66072850005116e-05	0.00012136579917582	3.08955294863379e-05	ESR1/CASP3/BCL2/BCL2L1/VEGFA	5	geneontology_Biological_Process	0.172413793103448
GO:0043122	regulation of I-kappaB kinase/NF-kappaB signaling	5/29	224/17913	2.71842657266777e-05	0.000123795014020017	3.15139234602352e-05	AKT1/STAT1/ESR1/TNF/IL1B	5	geneontology_Biological_Process	0.172413793103448
GO:0018210	peptidyl-threonine modification	4/29	109/17913	2.7399471056854e-05	0.000124368608852528	3.16599408405959e-05	MAPK1/AKT1/BCL2/TGFB1	4	geneontology_Biological_Process	0.137931034482759
GO:0072009	nephron epithelium development	4/29	109/17913	2.7399471056854e-05	0.000124368608852528	3.16599408405959e-05	STAT1/BCL2/TGFB1/VEGFA	4	geneontology_Biological_Process	0.137931034482759
GO:0042035	regulation of cytokine biosynthetic process	4/29	110/17913	2.84016635029023e-05	0.000128708026313152	3.27646062489621e-05	IL6/TNF/IL10/IL1B	4	geneontology_Biological_Process	0.137931034482759
GO:0030212	hyaluronan metabolic process	3/29	37/17913	2.85647507006769e-05	0.000129236948381147	3.28992514905267e-05	AKT1/IL1B/TGFB1	3	geneontology_Biological_Process	0.103448275862069
GO:0008645	hexose transmembrane transport	4/29	112/17913	3.0486446548745e-05	0.000137484994387302	3.49989183680023e-05	MAPK14/AKT1/TNF/IL1B	4	geneontology_Biological_Process	0.137931034482759
GO:0030218	erythrocyte differentiation	4/29	112/17913	3.0486446548745e-05	0.000137484994387302	3.49989183680023e-05	MAPK14/STAT1/CASP3/VEGFA	4	geneontology_Biological_Process	0.137931034482759
GO:0007431	salivary gland development	3/29	38/17913	3.0979424205221e-05	0.000139257508483792	3.54501390735466e-05	TNF/EGFR/TGFB1	3	geneontology_Biological_Process	0.103448275862069
GO:0032350	regulation of hormone metabolic process	3/29	38/17913	3.0979424205221e-05	0.000139257508483792	3.54501390735466e-05	TNF/IL1B/IFNG	3	geneontology_Biological_Process	0.103448275862069
GO:0007050	cell cycle arrest	5/29	231/17913	3.15010194042711e-05	0.000140776604323805	3.58368482670461e-05	TP53/CDKN1A/CXCL8/TGFB1/IFNG	5	geneontology_Biological_Process	0.172413793103448
GO:0051607	defense response to virus	5/29	231/17913	3.15010194042711e-05	0.000140776604323805	3.58368482670461e-05	IL6/STAT1/IL1B/BCL2/IFNG	5	geneontology_Biological_Process	0.172413793103448
GO:0030183	B cell differentiation	4/29	113/17913	3.15699238257547e-05	0.000140776604323805	3.58368482670461e-05	TP53/IL10/IL4/BCL2	4	geneontology_Biological_Process	0.137931034482759
GO:0051817	modification of morphology or physiology of other organism involved in symbiotic interaction	4/29	113/17913	3.15699238257547e-05	0.000140776604323805	3.58368482670461e-05	JUN/SP1/TGFB1/BCL2L1	4	geneontology_Biological_Process	0.137931034482759
GO:0060964	regulation of gene silencing by miRNA	4/29	113/17913	3.15699238257547e-05	0.000140776604323805	3.58368482670461e-05	TP53/ESR1/EGFR/TGFB1	4	geneontology_Biological_Process	0.137931034482759
GO:1904018	positive regulation of vasculature development	5/29	232/17913	3.21587993121077e-05	0.00014317344038793	3.6446999724837e-05	IL10/SP1/IL1B/CXCL8/VEGFA	5	geneontology_Biological_Process	0.172413793103448
GO:0015749	monosaccharide transmembrane transport	4/29	114/17913	3.26813872433592e-05	0.000145267984445362	3.69801981063109e-05	MAPK14/AKT1/TNF/IL1B	4	geneontology_Biological_Process	0.137931034482759
GO:0071560	cellular response to transforming growth factor beta stimulus	5/29	233/17913	3.28272106906564e-05	0.00014568381559691	3.70860543169668e-05	JUN/TP53/FOS/CREB1/TGFB1	5	geneontology_Biological_Process	0.172413793103448
GO:0050804	modulation of chemical synaptic transmission	6/29	393/17913	3.32455025326631e-05	0.000147305589123263	3.74989016936072e-05	MAPK1/TNF/CREB1/EGFR/IL1B/CCL2	6	geneontology_Biological_Process	0.206896551724138
GO:0099177	regulation of trans-synaptic signaling	6/29	394/17913	3.3722086564841e-05	0.000149180087708273	3.79760841181334e-05	MAPK1/TNF/CREB1/EGFR/IL1B/CCL2	6	geneontology_Biological_Process	0.206896551724138
GO:0002698	negative regulation of immune effector process	4/29	116/17913	3.49900755084237e-05	0.000154055830082112	3.92172792760915e-05	TNF/IL10/IL2/TGFB1	4	geneontology_Biological_Process	0.137931034482759
GO:0007569	cell aging	4/29	116/17913	3.49900755084237e-05	0.000154055830082112	3.92172792760915e-05	TP53/MAPK14/CDKN1A/BCL2	4	geneontology_Biological_Process	0.137931034482759
GO:0034219	carbohydrate transmembrane transport	4/29	116/17913	3.49900755084237e-05	0.000154055830082112	3.92172792760915e-05	MAPK14/AKT1/TNF/IL1B	4	geneontology_Biological_Process	0.137931034482759
GO:0014066	regulation of phosphatidylinositol 3-kinase signaling	4/29	117/17913	3.61882084927447e-05	0.000158148380393793	4.02591008575214e-05	MAPK3/MAPK1/TNF/EGFR	4	geneontology_Biological_Process	0.137931034482759
GO:0045727	positive regulation of translation	4/29	117/17913	3.61882084927447e-05	0.000158148380393793	4.02591008575214e-05	MAPK3/MAPK1/IL6/TNF	4	geneontology_Biological_Process	0.137931034482759
GO:0060147	regulation of posttranscriptional gene silencing	4/29	117/17913	3.61882084927447e-05	0.000158148380393793	4.02591008575214e-05	TP53/ESR1/EGFR/TGFB1	4	geneontology_Biological_Process	0.137931034482759
GO:0060966	regulation of gene silencing by RNA	4/29	117/17913	3.61882084927447e-05	0.000158148380393793	4.02591008575214e-05	TP53/ESR1/EGFR/TGFB1	4	geneontology_Biological_Process	0.137931034482759
GO:0002369	T cell cytokine production	3/29	40/17913	3.62033249699462e-05	0.000158148380393793	4.02591008575214e-05	IL6/IL4/IL1B	3	geneontology_Biological_Process	0.103448275862069
GO:0045165	cell fate commitment	5/29	238/17913	3.63329885558235e-05	0.00015846641487493	4.03400614226588e-05	TP53/IL6/CASP3/MCL1/BCL2	5	geneontology_Biological_Process	0.172413793103448
GO:0071559	response to transforming growth factor beta	5/29	239/17913	3.70677486742223e-05	0.000161418461804777	4.10915503395162e-05	JUN/TP53/FOS/CREB1/TGFB1	5	geneontology_Biological_Process	0.172413793103448
GO:0007517	muscle organ development	6/29	403/17913	3.82642255906204e-05	0.000166368793636598	4.23517333903903e-05	MAPK1/MAPK14/FOS/CREB1/BCL2/TGFB1	6	geneontology_Biological_Process	0.206896551724138
GO:0051896	regulation of protein kinase B signaling	5/29	241/17913	3.85718703029572e-05	0.000167184762883891	4.25594509031565e-05	AKT1/ESR1/TNF/EGFR/TGFB1	5	geneontology_Biological_Process	0.172413793103448
GO:1901617	organic hydroxy compound biosynthetic process	5/29	241/17913	3.85718703029572e-05	0.000167184762883891	4.25594509031565e-05	TP53/TNF/SP1/IL1B/IFNG	5	geneontology_Biological_Process	0.172413793103448
GO:0008631	intrinsic apoptotic signaling pathway in response to oxidative stress	3/29	41/17913	3.90189978725587e-05	0.000168598367551661	4.29193056974371e-05	AKT1/MCL1/BCL2	3	geneontology_Biological_Process	0.103448275862069
GO:1901985	positive regulation of protein acetylation	3/29	41/17913	3.90189978725587e-05	0.000168598367551661	4.29193056974371e-05	MAPK3/IL1B/TGFB1	3	geneontology_Biological_Process	0.103448275862069
GO:0019079	viral genome replication	4/29	120/17913	3.99632666913555e-05	0.000172144705206813	4.3822080452247e-05	TNF/BCL2/CXCL8/CCL2	4	geneontology_Biological_Process	0.137931034482759
GO:0034101	erythrocyte homeostasis	4/29	120/17913	3.99632666913555e-05	0.000172144705206813	4.3822080452247e-05	MAPK14/STAT1/CASP3/VEGFA	4	geneontology_Biological_Process	0.137931034482759
GO:0034763	negative regulation of transmembrane transport	4/29	122/17913	4.26351597143226e-05	0.000183370663771323	4.66798207398529e-05	AKT1/TNF/IL1B/TGFB1	4	geneontology_Biological_Process	0.137931034482759
GO:0006775	fat-soluble vitamin metabolic process	3/29	43/17913	4.50737908378153e-05	0.000192965675983089	4.91223785668809e-05	TNF/IL1B/IFNG	3	geneontology_Biological_Process	0.103448275862069
GO:0034198	cellular response to amino acid starvation	3/29	43/17913	4.50737908378153e-05	0.000192965675983089	4.91223785668809e-05	MAPK3/MAPK1/CDKN1A	3	geneontology_Biological_Process	0.103448275862069
GO:0042771	intrinsic apoptotic signaling pathway in response to DNA damage by p53 class mediator	3/29	43/17913	4.50737908378153e-05	0.000192965675983089	4.91223785668809e-05	TP53/CDKN1A/BCL2	3	geneontology_Biological_Process	0.103448275862069
GO:0019218	regulation of steroid metabolic process	4/29	124/17913	4.54355792007373e-05	0.000193918773709732	4.93650042416329e-05	TNF/SP1/IL1B/IFNG	4	geneontology_Biological_Process	0.137931034482759
GO:2000134	negative regulation of G1/S transition of mitotic cell cycle	4/29	124/17913	4.54355792007373e-05	0.000193918773709732	4.93650042416329e-05	TP53/CDKN1A/BCL2/CCL2	4	geneontology_Biological_Process	0.137931034482759
GO:0032868	response to insulin	5/29	252/17913	4.77119787043283e-05	0.000203323065212482	5.17590111809388e-05	AKT1/STAT1/IL10/SP1/IL1B	5	geneontology_Biological_Process	0.172413793103448
GO:0051205	protein insertion into membrane	3/29	44/17913	4.83192671325152e-05	0.00020528322789378	5.22580007177716e-05	TP53/EGFR/BCL2	3	geneontology_Biological_Process	0.103448275862069
GO:0071622	regulation of granulocyte chemotaxis	3/29	44/17913	4.83192671325152e-05	0.00020528322789378	5.22580007177716e-05	MAPK3/MAPK14/CXCL8	3	geneontology_Biological_Process	0.103448275862069
GO:0007249	I-kappaB kinase/NF-kappaB signaling	5/29	253/17913	4.86193583020054e-05	0.000206243761929511	5.25025194192929e-05	AKT1/STAT1/ESR1/TNF/IL1B	5	geneontology_Biological_Process	0.172413793103448
GO:0072604	interleukin-6 secretion	3/29	45/17913	5.17143427691707e-05	0.000219039321121092	5.57598256701665e-05	TNF/IL1B/NOS2	3	geneontology_Biological_Process	0.103448275862069
GO:0010595	positive regulation of endothelial cell migration	4/29	129/17913	5.30239405301153e-05	0.000224245405549972	5.70851144753577e-05	AKT1/SP1/TGFB1/VEGFA	4	geneontology_Biological_Process	0.137931034482759
GO:0001889	liver development	4/29	130/17913	5.46461546328679e-05	0.000230406706447508	5.86535683136444e-05	JUN/IL10/EGFR/TGFB1	4	geneontology_Biological_Process	0.137931034482759
GO:1902807	negative regulation of cell cycle G1/S phase transition	4/29	130/17913	5.46461546328679e-05	0.000230406706447508	5.86535683136444e-05	TP53/CDKN1A/BCL2/CCL2	4	geneontology_Biological_Process	0.137931034482759
GO:0006984	ER-nucleus signaling pathway	3/29	46/17913	5.52621588961097e-05	0.000230908001264554	5.87811806138687e-05	TP53/CXCL8/CCL2	3	geneontology_Biological_Process	0.103448275862069
GO:0048538	thymus development	3/29	46/17913	5.52621588961097e-05	0.000230908001264554	5.87811806138687e-05	MAPK3/MAPK1/BCL2	3	geneontology_Biological_Process	0.103448275862069
GO:0060324	face development	3/29	46/17913	5.52621588961097e-05	0.000230908001264554	5.87811806138687e-05	MAPK3/MAPK1/TGFB1	3	geneontology_Biological_Process	0.103448275862069
GO:0060711	labyrinthine layer development	3/29	46/17913	5.52621588961097e-05	0.000230908001264554	5.87811806138687e-05	MAPK1/AKT1/IL10	3	geneontology_Biological_Process	0.103448275862069
GO:0090199	regulation of release of cytochrome c from mitochondria	3/29	46/17913	5.52621588961097e-05	0.000230908001264554	5.87811806138687e-05	TP53/AKT1/BCL2L1	3	geneontology_Biological_Process	0.103448275862069
GO:1990928	response to amino acid starvation	3/29	46/17913	5.52621588961097e-05	0.000230908001264554	5.87811806138687e-05	MAPK3/MAPK1/CDKN1A	3	geneontology_Biological_Process	0.103448275862069
GO:0051250	negative regulation of lymphocyte activation	4/29	132/17913	5.79990321197855e-05	0.000241980991793177	6.15999805369295e-05	IL10/IL2/CASP3/TGFB1	4	geneontology_Biological_Process	0.137931034482759
GO:0006953	acute-phase response	3/29	47/17913	5.89658419506402e-05	0.000245646937991681	6.25332034847479e-05	IL6/TNF/IL1B	3	geneontology_Biological_Process	0.103448275862069
GO:0072331	signal transduction by p53 class mediator	5/29	264/17913	5.95102784899956e-05	0.000247544994256146	6.30163828786442e-05	TP53/MAPK14/AKT1/CDKN1A/BCL2	5	geneontology_Biological_Process	0.172413793103448
GO:0046631	alpha-beta T cell activation	4/29	133/17913	5.97306829172849e-05	0.000247722341206061	6.30615292704418e-05	IL6/IL2/BCL2/IFNG	4	geneontology_Biological_Process	0.137931034482759
GO:0061008	hepaticobiliary system development	4/29	133/17913	5.97306829172849e-05	0.000247722341206061	6.30615292704418e-05	JUN/IL10/EGFR/TGFB1	4	geneontology_Biological_Process	0.137931034482759
GO:0051972	regulation of telomerase activity	3/29	48/17913	6.28285037011568e-05	0.000260182822905088	6.62335363956827e-05	TP53/MAPK3/MAPK1	3	geneontology_Biological_Process	0.103448275862069
GO:0007548	sex differentiation	5/29	269/17913	6.50440139346872e-05	0.000268957962664649	6.84673830891444e-05	ESR1/CASP3/BCL2/BCL2L1/VEGFA	5	geneontology_Biological_Process	0.172413793103448
GO:0071901	negative regulation of protein serine/threonine kinase activity	4/29	136/17913	6.51524562602686e-05	0.000269007252736842	6.84799306345748e-05	AKT1/CASP3/CDKN1A/IL1B	4	geneontology_Biological_Process	0.137931034482759
GO:0000186	activation of MAPKK activity	3/29	49/17913	6.68532412891517e-05	0.000274403510269316	6.98536309261115e-05	MAPK3/MAPK1/EGFR	3	geneontology_Biological_Process	0.103448275862069
GO:0035272	exocrine system development	3/29	49/17913	6.68532412891517e-05	0.000274403510269316	6.98536309261115e-05	TNF/EGFR/TGFB1	3	geneontology_Biological_Process	0.103448275862069
GO:0060395	SMAD protein signal transduction	3/29	49/17913	6.68532412891517e-05	0.000274403510269316	6.98536309261115e-05	JUN/FOS/TGFB1	3	geneontology_Biological_Process	0.103448275862069
GO:1904707	positive regulation of vascular smooth muscle cell proliferation	3/29	49/17913	6.68532412891517e-05	0.000274403510269316	6.98536309261115e-05	JUN/TNF/IL10	3	geneontology_Biological_Process	0.103448275862069
GO:0007162	negative regulation of cell adhesion	5/29	271/17913	6.73656594731391e-05	0.000275694703306371	7.01823239584137e-05	AKT1/IL10/IL2/CASP3/TGFB1	5	geneontology_Biological_Process	0.172413793103448
GO:0050768	negative regulation of neurogenesis	5/29	271/17913	6.73656594731391e-05	0.000275694703306371	7.01823239584137e-05	TP53/IL6/TNF/IL1B/TGFB1	5	geneontology_Biological_Process	0.172413793103448
GO:0016236	macroautophagy	5/29	272/17913	6.85502499082908e-05	0.000279721151529146	7.12073182371704e-05	TP53/MAPK3/AKT1/CASP3/IL4	5	geneontology_Biological_Process	0.172413793103448
GO:0051348	negative regulation of transferase activity	5/29	272/17913	6.85502499082908e-05	0.000279721151529146	7.12073182371704e-05	TP53/AKT1/CASP3/CDKN1A/IL1B	5	geneontology_Biological_Process	0.172413793103448
GO:0038127	ERBB signaling pathway	4/29	138/17913	6.89610118156495e-05	0.000280575678730241	7.14248512696854e-05	MAPK1/AKT1/EGFR/TGFB1	4	geneontology_Biological_Process	0.137931034482759
GO:0044344	cellular response to fibroblast growth factor stimulus	4/29	138/17913	6.89610118156495e-05	0.000280575678730241	7.14248512696854e-05	MAPK3/MAPK1/CXCL8/CCL2	4	geneontology_Biological_Process	0.137931034482759
GO:0032675	regulation of interleukin-6 production	4/29	139/17913	7.09250200487547e-05	0.000285710279328489	7.27319427671338e-05	IL6/TNF/IL10/IL1B	4	geneontology_Biological_Process	0.137931034482759
GO:0045580	regulation of T cell differentiation	4/29	139/17913	7.09250200487547e-05	0.000285710279328489	7.27319427671338e-05	IL2/IL4/TGFB1/IFNG	4	geneontology_Biological_Process	0.137931034482759
GO:0060968	regulation of gene silencing	4/29	139/17913	7.09250200487547e-05	0.000285710279328489	7.27319427671338e-05	TP53/ESR1/EGFR/TGFB1	4	geneontology_Biological_Process	0.137931034482759
GO:0010718	positive regulation of epithelial to mesenchymal transition	3/29	50/17913	7.10431372711313e-05	0.000285710279328489	7.27319427671338e-05	IL6/IL1B/TGFB1	3	geneontology_Biological_Process	0.103448275862069
GO:0045661	regulation of myoblast differentiation	3/29	50/17913	7.10431372711313e-05	0.000285710279328489	7.27319427671338e-05	MAPK14/TNF/TGFB1	3	geneontology_Biological_Process	0.103448275862069
GO:0051966	regulation of synaptic transmission, glutamatergic	3/29	50/17913	7.10431372711313e-05	0.000285710279328489	7.27319427671338e-05	TNF/EGFR/CCL2	3	geneontology_Biological_Process	0.103448275862069
GO:0060425	lung morphogenesis	3/29	50/17913	7.10431372711313e-05	0.000285710279328489	7.27319427671338e-05	MAPK3/MAPK1/TNF	3	geneontology_Biological_Process	0.103448275862069
GO:1905517	macrophage migration	3/29	50/17913	7.10431372711313e-05	0.000285710279328489	7.27319427671338e-05	MAPK3/MAPK14/CCL2	3	geneontology_Biological_Process	0.103448275862069
GO:0034248	regulation of cellular amide metabolic process	6/29	452/17913	7.24231431764203e-05	0.000290840489960639	7.40379167312411e-05	MAPK3/MAPK1/IL6/AKT1/TNF/CASP3	6	geneontology_Biological_Process	0.206896551724138
GO:0072073	kidney epithelium development	4/29	140/17913	7.29295285823634e-05	0.000292452656343952	7.44483184619658e-05	STAT1/BCL2/TGFB1/VEGFA	4	geneontology_Biological_Process	0.137931034482759
GO:0006959	humoral immune response	5/29	276/17913	7.34505704104254e-05	0.000294118878927953	7.4872481029381e-05	IL6/TNF/IL1B/BCL2/CCL2	5	geneontology_Biological_Process	0.172413793103448
GO:0035065	regulation of histone acetylation	3/29	51/17913	7.54012596604376e-05	0.000300634206972303	7.65310579190347e-05	MAPK3/IL1B/TGFB1	3	geneontology_Biological_Process	0.103448275862069
GO:0045599	negative regulation of fat cell differentiation	3/29	51/17913	7.54012596604376e-05	0.000300634206972303	7.65310579190347e-05	IL6/TNF/TGFB1	3	geneontology_Biological_Process	0.103448275862069
GO:0070228	regulation of lymphocyte apoptotic process	3/29	51/17913	7.54012596604376e-05	0.000300634206972303	7.65310579190347e-05	TP53/IL10/IL2	3	geneontology_Biological_Process	0.103448275862069
GO:0072006	nephron development	4/29	142/17913	7.70620995191333e-05	0.000306817244799749	7.81050452269111e-05	STAT1/BCL2/TGFB1/VEGFA	4	geneontology_Biological_Process	0.137931034482759
GO:0050777	negative regulation of immune response	4/29	143/17913	7.91911937471512e-05	0.000314395807654288	8.00342848786623e-05	TNF/IL10/IL2/TGFB1	4	geneontology_Biological_Process	0.137931034482759
GO:0062013	positive regulation of small molecule metabolic process	4/29	143/17913	7.91911937471512e-05	0.000314395807654288	8.00342848786623e-05	AKT1/TNF/IL1B/IFNG	4	geneontology_Biological_Process	0.137931034482759
GO:0046165	alcohol biosynthetic process	4/29	145/17913	8.35775951090309e-05	0.000330867553364871	8.42274209083236e-05	TNF/SP1/IL1B/IFNG	4	geneontology_Biological_Process	0.137931034482759
GO:0071774	response to fibroblast growth factor	4/29	145/17913	8.35775951090309e-05	0.000330867553364871	8.42274209083236e-05	MAPK3/MAPK1/CXCL8/CCL2	4	geneontology_Biological_Process	0.137931034482759
GO:0032655	regulation of interleukin-12 production	3/29	53/17913	8.46343832488386e-05	0.000333158228975301	8.48105475910158e-05	MAPK14/IL10/IFNG	3	geneontology_Biological_Process	0.103448275862069
GO:0038066	p38MAPK cascade	3/29	53/17913	8.46343832488386e-05	0.000333158228975301	8.48105475910158e-05	MAPK14/IL1B/VEGFA	3	geneontology_Biological_Process	0.103448275862069
GO:0042130	negative regulation of T cell proliferation	3/29	53/17913	8.46343832488386e-05	0.000333158228975301	8.48105475910158e-05	IL10/CASP3/TGFB1	3	geneontology_Biological_Process	0.103448275862069
GO:0050994	regulation of lipid catabolic process	3/29	53/17913	8.46343832488386e-05	0.000333158228975301	8.48105475910158e-05	AKT1/TNF/IL1B	3	geneontology_Biological_Process	0.103448275862069
GO:0043524	negative regulation of neuron apoptotic process	4/29	146/17913	8.58359466484736e-05	0.000337411542044141	8.589329380309e-05	JUN/BCL2/BCL2L1/CCL2	4	geneontology_Biological_Process	0.137931034482759
GO:0007093	mitotic cell cycle checkpoint	4/29	147/17913	8.81384317931524e-05	0.000345974379447205	8.8073095668769e-05	TP53/CDKN1A/TGFB1/BCL2L1	4	geneontology_Biological_Process	0.137931034482759
GO:0010823	negative regulation of mitochondrion organization	3/29	54/17913	8.95154481338601e-05	0.00035088544859222	8.93232837992771e-05	TP53/AKT1/BCL2L1	3	geneontology_Biological_Process	0.103448275862069
GO:0008643	carbohydrate transport	4/29	148/17913	9.04855778617614e-05	0.000354190035815631	9.01645172661549e-05	MAPK14/AKT1/TNF/IL1B	4	geneontology_Biological_Process	0.137931034482759
GO:0001818	negative regulation of cytokine production	5/29	290/17913	9.27654413654689e-05	0.00036209703793496	9.21773661806369e-05	IL6/TNF/IL10/TGFB1/IFNG	5	geneontology_Biological_Process	0.172413793103448
GO:0051961	negative regulation of nervous system development	5/29	290/17913	9.27654413654689e-05	0.00036209703793496	9.21773661806369e-05	TP53/IL6/TNF/IL1B/TGFB1	5	geneontology_Biological_Process	0.172413793103448
GO:0032615	interleukin-12 production	3/29	55/17913	9.45768668810414e-05	0.000368136491616568	9.37148019374036e-05	MAPK14/IL10/IFNG	3	geneontology_Biological_Process	0.103448275862069
GO:0032722	positive regulation of chemokine production	3/29	55/17913	9.45768668810414e-05	0.000368136491616568	9.37148019374036e-05	IL6/TNF/IL1B	3	geneontology_Biological_Process	0.103448275862069
GO:0030856	regulation of epithelial cell differentiation	4/29	151/17913	9.78002848830182e-05	0.000379623111377398	9.66388975387102e-05	STAT1/TNF/IL1B/IFNG	4	geneontology_Biological_Process	0.137931034482759
GO:1905952	regulation of lipid localization	4/29	151/17913	9.78002848830182e-05	0.000379623111377398	9.66388975387102e-05	IL6/AKT1/TNF/IL1B	4	geneontology_Biological_Process	0.137931034482759
GO:0090183	regulation of kidney development	3/29	57/17913	0.000105252735353774	0.0004074157964319	0.000103713952673163	STAT1/TGFB1/VEGFA	3	geneontology_Biological_Process	0.103448275862069
GO:2000756	regulation of peptidyl-lysine acetylation	3/29	57/17913	0.000105252735353774	0.0004074157964319	0.000103713952673163	MAPK3/IL1B/TGFB1	3	geneontology_Biological_Process	0.103448275862069
GO:0045931	positive regulation of mitotic cell cycle	4/29	154/17913	0.000105536114849375	0.000407946119396959	0.000103848954534606	AKT1/EGFR/IL1B/TGFB1	4	geneontology_Biological_Process	0.137931034482759
GO:0007405	neuroblast proliferation	3/29	58/17913	0.000110873134080879	0.000427627079264627	0.000108859045351296	TP53/TGFB1/VEGFA	3	geneontology_Biological_Process	0.103448275862069
GO:0007519	skeletal muscle tissue development	4/29	156/17913	0.000110934473738186	0.000427627079264627	0.000108859045351296	MAPK14/FOS/BCL2/TGFB1	4	geneontology_Biological_Process	0.137931034482759
GO:0001660	fever generation	2/29	10/17913	0.000112970171564393	0.000431890079766754	0.000109944257648402	TNF/IL1B	2	geneontology_Biological_Process	0.0689655172413793
GO:0010749	regulation of nitric oxide mediated signal transduction	2/29	10/17913	0.000112970171564393	0.000431890079766754	0.000109944257648402	EGFR/VEGFA	2	geneontology_Biological_Process	0.0689655172413793
GO:0031652	positive regulation of heat generation	2/29	10/17913	0.000112970171564393	0.000431890079766754	0.000109944257648402	TNF/IL1B	2	geneontology_Biological_Process	0.0689655172413793
GO:0045080	positive regulation of chemokine biosynthetic process	2/29	10/17913	0.000112970171564393	0.000431890079766754	0.000109944257648402	TNF/IL1B	2	geneontology_Biological_Process	0.0689655172413793
GO:0048304	positive regulation of isotype switching to IgG isotypes	2/29	10/17913	0.000112970171564393	0.000431890079766754	0.000109944257648402	IL2/IL4	2	geneontology_Biological_Process	0.0689655172413793
GO:0060439	trachea morphogenesis	2/29	10/17913	0.000112970171564393	0.000431890079766754	0.000109944257648402	MAPK3/MAPK1	2	geneontology_Biological_Process	0.0689655172413793
GO:0009408	response to heat	4/29	158/17913	0.000116530815210278	0.000443660685011632	0.000112940646119329	MAPK3/MAPK1/AKT1/CDKN1A	4	geneontology_Biological_Process	0.137931034482759
GO:0043535	regulation of blood vessel endothelial cell migration	4/29	158/17913	0.000116530815210278	0.000443660685011632	0.000112940646119329	AKT1/SP1/TGFB1/VEGFA	4	geneontology_Biological_Process	0.137931034482759
GO:0070059	intrinsic apoptotic signaling pathway in response to endoplasmic reticulum stress	3/29	59/17913	0.000116685784755481	0.000443660685011632	0.000112940646119329	TP53/BCL2/BCL2L1	3	geneontology_Biological_Process	0.103448275862069
GO:2000351	regulation of endothelial cell apoptotic process	3/29	59/17913	0.000116685784755481	0.000443660685011632	0.000112940646119329	TNF/IL4/CCL2	3	geneontology_Biological_Process	0.103448275862069
GO:0001658	branching involved in ureteric bud morphogenesis	3/29	60/17913	0.000122693626368823	0.000463343003644865	0.000117951082830676	BCL2/TGFB1/VEGFA	3	geneontology_Biological_Process	0.103448275862069
GO:0002294	CD4-positive, alpha-beta T cell differentiation involved in immune response	3/29	60/17913	0.000122693626368823	0.000463343003644865	0.000117951082830676	IL6/IL2/IFNG	3	geneontology_Biological_Process	0.103448275862069
GO:0046324	regulation of glucose import	3/29	60/17913	0.000122693626368823	0.000463343003644865	0.000117951082830676	MAPK14/AKT1/TNF	3	geneontology_Biological_Process	0.103448275862069
GO:0050766	positive regulation of phagocytosis	3/29	60/17913	0.000122693626368823	0.000463343003644865	0.000117951082830676	TNF/IL1B/CCL2	3	geneontology_Biological_Process	0.103448275862069
GO:1905953	negative regulation of lipid localization	3/29	60/17913	0.000122693626368823	0.000463343003644865	0.000117951082830676	IL6/AKT1/TNF	3	geneontology_Biological_Process	0.103448275862069
GO:0051100	negative regulation of binding	4/29	162/17913	0.000128334996224997	0.000482853682796321	0.00012291782607396	JUN/MAPK3/AKT1/IL10	4	geneontology_Biological_Process	0.137931034482759
GO:0051302	regulation of cell division	4/29	162/17913	0.000128334996224997	0.000482853682796321	0.00012291782607396	IL1B/TGFB1/BCL2L1/VEGFA	4	geneontology_Biological_Process	0.137931034482759
GO:0002287	alpha-beta T cell activation involved in immune response	3/29	61/17913	0.00012889958378201	0.000482853682796321	0.00012291782607396	IL6/IL2/IFNG	3	geneontology_Biological_Process	0.103448275862069
GO:0002293	alpha-beta T cell differentiation involved in immune response	3/29	61/17913	0.00012889958378201	0.000482853682796321	0.00012291782607396	IL6/IL2/IFNG	3	geneontology_Biological_Process	0.103448275862069
GO:0016575	histone deacetylation	3/29	61/17913	0.00012889958378201	0.000482853682796321	0.00012291782607396	TP53/TGFB1/VEGFA	3	geneontology_Biological_Process	0.103448275862069
GO:0034113	heterotypic cell-cell adhesion	3/29	61/17913	0.00012889958378201	0.000482853682796321	0.00012291782607396	TNF/IL10/IL1B	3	geneontology_Biological_Process	0.103448275862069
GO:0002695	negative regulation of leukocyte activation	4/29	163/17913	0.000131416659861956	0.000490962776186691	0.000124982120427485	IL10/IL2/CASP3/TGFB1	4	geneontology_Biological_Process	0.137931034482759
GO:0050680	negative regulation of epithelial cell proliferation	4/29	163/17913	0.000131416659861956	0.000490962776186691	0.000124982120427485	STAT1/TNF/TGFB1/CCL2	4	geneontology_Biological_Process	0.137931034482759
GO:0060562	epithelial tube morphogenesis	5/29	313/17913	0.000132745672779251	0.000495263975951502	0.000126077056934003	ESR1/TNF/BCL2/TGFB1/VEGFA	5	geneontology_Biological_Process	0.172413793103448
GO:0045619	regulation of lymphocyte differentiation	4/29	164/17913	0.000134551682938826	0.000501330936297472	0.000127621494934941	IL2/IL4/TGFB1/IFNG	4	geneontology_Biological_Process	0.137931034482759
GO:0032729	positive regulation of interferon-gamma production	3/29	62/17913	0.000135306567766804	0.000502799205821443	0.000127995265508528	TNF/IL2/IL1B	3	geneontology_Biological_Process	0.103448275862069
GO:0035249	synaptic transmission, glutamatergic	3/29	62/17913	0.000135306567766804	0.000502799205821443	0.000127995265508528	TNF/EGFR/CCL2	3	geneontology_Biological_Process	0.103448275862069
GO:0060538	skeletal muscle organ development	4/29	165/17913	0.000137740624539025	0.000507830376379552	0.000129276027299612	MAPK14/FOS/BCL2/TGFB1	4	geneontology_Biological_Process	0.137931034482759
GO:0010623	programmed cell death involved in cell development	2/29	11/17913	0.000137935986695128	0.000507830376379552	0.000129276027299612	IL1B/BCL2	2	geneontology_Biological_Process	0.0689655172413793
GO:0050930	induction of positive chemotaxis	2/29	11/17913	0.000137935986695128	0.000507830376379552	0.000129276027299612	CXCL8/VEGFA	2	geneontology_Biological_Process	0.0689655172413793
GO:0051024	positive regulation of immunoglobulin secretion	2/29	11/17913	0.000137935986695128	0.000507830376379552	0.000129276027299612	IL6/IL2	2	geneontology_Biological_Process	0.0689655172413793
GO:0061307	cardiac neural crest cell differentiation involved in heart development	2/29	11/17913	0.000137935986695128	0.000507830376379552	0.000129276027299612	MAPK3/MAPK1	2	geneontology_Biological_Process	0.0689655172413793
GO:0061308	cardiac neural crest cell development involved in heart development	2/29	11/17913	0.000137935986695128	0.000507830376379552	0.000129276027299612	MAPK3/MAPK1	2	geneontology_Biological_Process	0.0689655172413793
GO:0072584	caveolin-mediated endocytosis	2/29	11/17913	0.000137935986695128	0.000507830376379552	0.000129276027299612	MAPK3/MAPK1	2	geneontology_Biological_Process	0.0689655172413793
GO:0042108	positive regulation of cytokine biosynthetic process	3/29	63/17913	0.000141917475046317	0.000521111993351891	0.000132657067028941	IL6/TNF/IL1B	3	geneontology_Biological_Process	0.103448275862069
GO:0045600	positive regulation of fat cell differentiation	3/29	63/17913	0.000141917475046317	0.000521111993351891	0.000132657067028941	MAPK14/AKT1/CREB1	3	geneontology_Biological_Process	0.103448275862069
GO:0030308	negative regulation of cell growth	4/29	167/17913	0.000144282508173153	0.00052909914510339	0.000134690319264134	TP53/CDKN1A/BCL2/TGFB1	4	geneontology_Biological_Process	0.137931034482759
GO:0019915	lipid storage	3/29	64/17913	0.000148735188335615	0.00054257195011958	0.000138120028848449	IL6/TNF/IL1B	3	geneontology_Biological_Process	0.103448275862069
GO:0046622	positive regulation of organ growth	3/29	64/17913	0.000148735188335615	0.00054257195011958	0.000138120028848449	MAPK1/MAPK14/AKT1	3	geneontology_Biological_Process	0.103448275862069
GO:0071230	cellular response to amino acid stimulus	3/29	64/17913	0.000148735188335615	0.00054257195011958	0.000138120028848449	TNF/EGFR/BCL2L1	3	geneontology_Biological_Process	0.103448275862069
GO:2000378	negative regulation of reactive oxygen species metabolic process	3/29	64/17913	0.000148735188335615	0.00054257195011958	0.000138120028848449	TP53/IL10/BCL2	3	geneontology_Biological_Process	0.103448275862069
GO:0038095	Fc-epsilon receptor signaling pathway	4/29	169/17913	0.000151046817311092	0.000548849387022183	0.000139718046891754	JUN/MAPK3/MAPK1/FOS	4	geneontology_Biological_Process	0.137931034482759
GO:0046328	regulation of JNK cascade	4/29	169/17913	0.000151046817311092	0.000548849387022183	0.000139718046891754	AKT1/TNF/EGFR/IL1B	4	geneontology_Biological_Process	0.137931034482759
GO:0050796	regulation of insulin secretion	4/29	169/17913	0.000151046817311092	0.000548849387022183	0.000139718046891754	TNF/IL1B/IFNG/NOS2	4	geneontology_Biological_Process	0.137931034482759
GO:0001959	regulation of cytokine-mediated signaling pathway	4/29	170/17913	0.000154513797008414	0.000560716083675065	0.000142738896907444	IL6/STAT1/TNF/IFNG	4	geneontology_Biological_Process	0.137931034482759
GO:0014031	mesenchymal cell development	3/29	65/17913	0.00015576257638223	0.000561737358848438	0.0001429988781991	MAPK3/MAPK1/BCL2	3	geneontology_Biological_Process	0.103448275862069
GO:0030641	regulation of cellular pH	3/29	65/17913	0.00015576257638223	0.000561737358848438	0.0001429988781991	MAPK3/MAPK1/BCL2	3	geneontology_Biological_Process	0.103448275862069
GO:0035924	cellular response to vascular endothelial growth factor stimulus	3/29	65/17913	0.00015576257638223	0.000561737358848438	0.0001429988781991	MAPK14/AKT1/VEGFA	3	geneontology_Biological_Process	0.103448275862069
GO:0071242	cellular response to ammonium ion	3/29	65/17913	0.00015576257638223	0.000561737358848438	0.0001429988781991	MAPK3/MAPK1/CASP3	3	geneontology_Biological_Process	0.103448275862069
GO:0001655	urogenital system development	5/29	324/17913	0.000156004562521956	0.000561737358848438	0.0001429988781991	STAT1/ESR1/BCL2/TGFB1/VEGFA	5	geneontology_Biological_Process	0.172413793103448
GO:0019058	viral life cycle	5/29	324/17913	0.000156004562521956	0.000561737358848438	0.0001429988781991	TNF/EGFR/BCL2/CXCL8/CCL2	5	geneontology_Biological_Process	0.172413793103448
GO:0001659	temperature homeostasis	4/29	172/17913	0.000161620252057537	0.000581207280624976	0.000147955246026187	TNF/IL4/IL1B/VEGFA	4	geneontology_Biological_Process	0.137931034482759
GO:0002292	T cell differentiation involved in immune response	3/29	66/17913	0.000163002494006579	0.000583917674545418	0.000148645218455465	IL6/IL2/IFNG	3	geneontology_Biological_Process	0.103448275862069
GO:0043030	regulation of macrophage activation	3/29	66/17913	0.000163002494006579	0.000583917674545418	0.000148645218455465	IL6/TNF/IL10	3	geneontology_Biological_Process	0.103448275862069
GO:0060675	ureteric bud morphogenesis	3/29	66/17913	0.000163002494006579	0.000583917674545418	0.000148645218455465	BCL2/TGFB1/VEGFA	3	geneontology_Biological_Process	0.103448275862069
GO:0051897	positive regulation of protein kinase B signaling	4/29	173/17913	0.000165260870379454	0.000586322976255527	0.000149257524973552	ESR1/TNF/EGFR/TGFB1	4	geneontology_Biological_Process	0.137931034482759
GO:0031650	regulation of heat generation	2/29	12/17913	0.000165356964239987	0.000586322976255527	0.000149257524973552	TNF/IL1B	2	geneontology_Biological_Process	0.0689655172413793
GO:0045346	regulation of MHC class II biosynthetic process	2/29	12/17913	0.000165356964239987	0.000586322976255527	0.000149257524973552	IL10/IL4	2	geneontology_Biological_Process	0.0689655172413793
GO:0045410	positive regulation of interleukin-6 biosynthetic process	2/29	12/17913	0.000165356964239987	0.000586322976255527	0.000149257524973552	TNF/IL1B	2	geneontology_Biological_Process	0.0689655172413793
GO:0048302	regulation of isotype switching to IgG isotypes	2/29	12/17913	0.000165356964239987	0.000586322976255527	0.000149257524973552	IL2/IL4	2	geneontology_Biological_Process	0.0689655172413793
GO:0051712	positive regulation of killing of cells of other organism	2/29	12/17913	0.000165356964239987	0.000586322976255527	0.000149257524973552	IFNG/NOS2	2	geneontology_Biological_Process	0.0689655172413793
GO:1901550	regulation of endothelial cell development	2/29	12/17913	0.000165356964239987	0.000586322976255527	0.000149257524973552	TNF/IL1B	2	geneontology_Biological_Process	0.0689655172413793
GO:1903140	regulation of establishment of endothelial barrier	2/29	12/17913	0.000165356964239987	0.000586322976255527	0.000149257524973552	TNF/IL1B	2	geneontology_Biological_Process	0.0689655172413793
GO:0072171	mesonephric tubule morphogenesis	3/29	67/17913	0.000170457782142288	0.000603641472465763	0.000153666214356854	BCL2/TGFB1/VEGFA	3	geneontology_Biological_Process	0.103448275862069
GO:0010821	regulation of mitochondrion organization	4/29	175/17913	0.000172719757869115	0.000610875590331502	0.000155507770242831	TP53/AKT1/BCL2/BCL2L1	4	geneontology_Biological_Process	0.137931034482759
GO:0030336	negative regulation of cell migration	5/29	332/17913	0.000174794820208773	0.000617431132980799	0.000157176584378244	AKT1/IL4/BCL2/TGFB1/CCL2	5	geneontology_Biological_Process	0.172413793103448
GO:0042698	ovulation cycle	3/29	68/17913	0.000178131267876431	0.000626833135822744	0.000159570008703767	ESR1/CASP3/EGFR	3	geneontology_Biological_Process	0.103448275862069
GO:0046323	glucose import	3/29	68/17913	0.000178131267876431	0.000626833135822744	0.000159570008703767	MAPK14/AKT1/TNF	3	geneontology_Biological_Process	0.103448275862069
GO:0072091	regulation of stem cell proliferation	3/29	68/17913	0.000178131267876431	0.000626833135822744	0.000159570008703767	TP53/TGFB1/VEGFA	3	geneontology_Biological_Process	0.103448275862069
GO:0006367	transcription initiation from RNA polymerase II promoter	4/29	178/17913	0.000184360870373841	0.000647120586564098	0.000164734491093688	TP53/ESR1/CREB1/CDKN1A	4	geneontology_Biological_Process	0.137931034482759
GO:2001235	positive regulation of apoptotic signaling pathway	4/29	178/17913	0.000184360870373841	0.000647120586564098	0.000164734491093688	TP53/MCL1/BCL2/BCL2L1	4	geneontology_Biological_Process	0.137931034482759
GO:0048662	negative regulation of smooth muscle cell proliferation	3/29	69/17913	0.00018602576448967	0.000651323876423004	0.000165804503128852	IL10/CDKN1A/IFNG	3	geneontology_Biological_Process	0.103448275862069
GO:0051155	positive regulation of striated muscle cell differentiation	3/29	69/17913	0.00018602576448967	0.000651323876423004	0.000165804503128852	MAPK14/BCL2/TGFB1	3	geneontology_Biological_Process	0.103448275862069
GO:0007219	Notch signaling pathway	4/29	179/17913	0.000188364301274	0.00065703542884936	0.000167258466581485	AKT1/STAT1/EGFR/TGFB1	4	geneontology_Biological_Process	0.137931034482759
GO:0038061	NIK/NF-kappaB signaling	4/29	179/17913	0.000188364301274	0.00065703542884936	0.000167258466581485	AKT1/TNF/EGFR/IL1B	4	geneontology_Biological_Process	0.137931034482759
GO:1901796	regulation of signal transduction by p53 class mediator	4/29	179/17913	0.000188364301274	0.00065703542884936	0.000167258466581485	TP53/MAPK14/AKT1/BCL2	4	geneontology_Biological_Process	0.137931034482759
GO:0006066	alcohol metabolic process	5/29	339/17913	0.000192617747001139	0.000671032076115218	0.000170821528261536	TNF/SP1/IL4/IL1B/IFNG	5	geneontology_Biological_Process	0.172413793103448
GO:0010763	positive regulation of fibroblast migration	2/29	13/17913	0.000195225639081117	0.000671720810023548	0.000170996856063253	AKT1/TGFB1	2	geneontology_Biological_Process	0.0689655172413793
GO:0033127	regulation of histone phosphorylation	2/29	13/17913	0.000195225639081117	0.000671720810023548	0.000170996856063253	MAPK3/IL1B	2	geneontology_Biological_Process	0.0689655172413793
GO:0035745	T-helper 2 cell cytokine production	2/29	13/17913	0.000195225639081117	0.000671720810023548	0.000170996856063253	IL6/IL4	2	geneontology_Biological_Process	0.0689655172413793
GO:0044130	negative regulation of growth of symbiont in host	2/29	13/17913	0.000195225639081117	0.000671720810023548	0.000170996856063253	TNF/IL10	2	geneontology_Biological_Process	0.0689655172413793
GO:0045342	MHC class II biosynthetic process	2/29	13/17913	0.000195225639081117	0.000671720810023548	0.000170996856063253	IL10/IL4	2	geneontology_Biological_Process	0.0689655172413793
GO:0048291	isotype switching to IgG isotypes	2/29	13/17913	0.000195225639081117	0.000671720810023548	0.000170996856063253	IL2/IL4	2	geneontology_Biological_Process	0.0689655172413793
GO:0048308	organelle inheritance	2/29	13/17913	0.000195225639081117	0.000671720810023548	0.000170996856063253	MAPK3/MAPK1	2	geneontology_Biological_Process	0.0689655172413793
GO:0048313	Golgi inheritance	2/29	13/17913	0.000195225639081117	0.000671720810023548	0.000170996856063253	MAPK3/MAPK1	2	geneontology_Biological_Process	0.0689655172413793
GO:0061029	eyelid development in camera-type eye	2/29	13/17913	0.000195225639081117	0.000671720810023548	0.000170996856063253	JUN/EGFR	2	geneontology_Biological_Process	0.0689655172413793
GO:0071850	mitotic cell cycle arrest	2/29	13/17913	0.000195225639081117	0.000671720810023548	0.000170996856063253	TP53/CDKN1A	2	geneontology_Biological_Process	0.0689655172413793
GO:0001654	eye development	5/29	342/17913	0.000200668388256547	0.000688186523568599	0.000175188456512468	JUN/EGFR/BCL2/TGFB1/VEGFA	5	geneontology_Biological_Process	0.172413793103448
GO:0043534	blood vessel endothelial cell migration	4/29	182/17913	0.000200751935292885	0.000688186523568599	0.000175188456512468	AKT1/SP1/TGFB1/VEGFA	4	geneontology_Biological_Process	0.137931034482759
GO:0043901	negative regulation of multi-organism process	4/29	182/17913	0.000200751935292885	0.000688186523568599	0.000175188456512468	JUN/STAT1/TNF/IL10	4	geneontology_Biological_Process	0.137931034482759
GO:1901983	regulation of protein acetylation	3/29	71/17913	0.000202488974684257	0.00069328841823713	0.00017648722221284	MAPK3/IL1B/TGFB1	3	geneontology_Biological_Process	0.103448275862069
GO:0032102	negative regulation of response to external stimulus	5/29	343/17913	0.000203408354345822	0.000695581697621849	0.000177071011726296	IL10/IL2/CDKN1A/IL4/CCL2	5	geneontology_Biological_Process	0.172413793103448
GO:0060759	regulation of response to cytokine stimulus	4/29	183/17913	0.000205008879872173	0.000700195769857533	0.000178245594728902	IL6/STAT1/TNF/IFNG	4	geneontology_Biological_Process	0.137931034482759
GO:0032677	regulation of interleukin-8 production	3/29	72/17913	0.000211063246154885	0.000719991758915136	0.000183284967993806	TNF/IL10/IL1B	3	geneontology_Biological_Process	0.103448275862069
GO:0150063	visual system development	5/29	346/17913	0.000211800316740723	0.000721622839555495	0.000183700184639361	JUN/EGFR/BCL2/TGFB1/VEGFA	5	geneontology_Biological_Process	0.172413793103448
GO:2000146	negative regulation of cell motility	5/29	347/17913	0.000214655665063959	0.00073045828880739	0.00018594938404101	AKT1/IL4/BCL2/TGFB1/CCL2	5	geneontology_Biological_Process	0.172413793103448
GO:0051881	regulation of mitochondrial membrane potential	3/29	73/17913	0.000219869644362822	0.000747288657120956	0.000190233812966036	AKT1/BCL2/BCL2L1	3	geneontology_Biological_Process	0.103448275862069
GO:0050866	negative regulation of cell activation	4/29	187/17913	0.000222691031541615	0.000755956035208868	0.000192440227269759	IL10/IL2/CASP3/TGFB1	4	geneontology_Biological_Process	0.137931034482759
GO:0048880	sensory system development	5/29	351/17913	0.000226372618394583	0.000763103279701215	0.000194259668203357	JUN/EGFR/BCL2/TGFB1/VEGFA	5	geneontology_Biological_Process	0.172413793103448
GO:0030213	hyaluronan biosynthetic process	2/29	14/17913	0.00022753456240822	0.000763103279701215	0.000194259668203357	IL1B/TGFB1	2	geneontology_Biological_Process	0.0689655172413793
GO:0030889	negative regulation of B cell proliferation	2/29	14/17913	0.00022753456240822	0.000763103279701215	0.000194259668203357	IL10/CASP3	2	geneontology_Biological_Process	0.0689655172413793
GO:0032310	prostaglandin secretion	2/29	14/17913	0.00022753456240822	0.000763103279701215	0.000194259668203357	IL1B/NOS2	2	geneontology_Biological_Process	0.0689655172413793
GO:0044126	regulation of growth of symbiont in host	2/29	14/17913	0.00022753456240822	0.000763103279701215	0.000194259668203357	TNF/IL10	2	geneontology_Biological_Process	0.0689655172413793
GO:0044146	negative regulation of growth of symbiont involved in interaction with host	2/29	14/17913	0.00022753456240822	0.000763103279701215	0.000194259668203357	TNF/IL10	2	geneontology_Biological_Process	0.0689655172413793
GO:0051770	positive regulation of nitric-oxide synthase biosynthetic process	2/29	14/17913	0.00022753456240822	0.000763103279701215	0.000194259668203357	STAT1/CCL2	2	geneontology_Biological_Process	0.0689655172413793
GO:0090399	replicative senescence	2/29	14/17913	0.00022753456240822	0.000763103279701215	0.000194259668203357	TP53/CDKN1A	2	geneontology_Biological_Process	0.0689655172413793
GO:1903351	cellular response to dopamine	2/29	14/17913	0.00022753456240822	0.000763103279701215	0.000194259668203357	MAPK3/MAPK1	2	geneontology_Biological_Process	0.0689655172413793
GO:1905050	positive regulation of metallopeptidase activity	2/29	14/17913	0.00022753456240822	0.000763103279701215	0.000194259668203357	MAPK3/MAPK14	2	geneontology_Biological_Process	0.0689655172413793
GO:0043367	CD4-positive, alpha-beta T cell differentiation	3/29	74/17913	0.000228910914155629	0.000765876011706767	0.000194965509750292	IL6/IL2/IFNG	3	geneontology_Biological_Process	0.103448275862069
GO:0046902	regulation of mitochondrial membrane permeability	3/29	74/17913	0.000228910914155629	0.000765876011706767	0.000194965509750292	TP53/BCL2/BCL2L1	3	geneontology_Biological_Process	0.103448275862069
GO:0006694	steroid biosynthetic process	4/29	190/17913	0.000236656335631303	0.000790840776264318	0.000201320674259117	TNF/SP1/IL1B/IFNG	4	geneontology_Biological_Process	0.137931034482759
GO:0001937	negative regulation of endothelial cell proliferation	3/29	75/17913	0.000238189786813403	0.000791221616029742	0.000201417622874642	STAT1/TNF/CCL2	3	geneontology_Biological_Process	0.103448275862069
GO:0072078	nephron tubule morphogenesis	3/29	75/17913	0.000238189786813403	0.000791221616029742	0.000201417622874642	BCL2/TGFB1/VEGFA	3	geneontology_Biological_Process	0.103448275862069
GO:0072332	intrinsic apoptotic signaling pathway by p53 class mediator	3/29	75/17913	0.000238189786813403	0.000791221616029742	0.000201417622874642	TP53/CDKN1A/BCL2	3	geneontology_Biological_Process	0.103448275862069
GO:1901224	positive regulation of NIK/NF-kappaB signaling	3/29	75/17913	0.000238189786813403	0.000791221616029742	0.000201417622874642	TNF/EGFR/IL1B	3	geneontology_Biological_Process	0.103448275862069
GO:1903201	regulation of oxidative stress-induced cell death	3/29	75/17913	0.000238189786813403	0.000791221616029742	0.000201417622874642	AKT1/IL10/MCL1	3	geneontology_Biological_Process	0.103448275862069
GO:0045732	positive regulation of protein catabolic process	4/29	192/17913	0.000246310570932529	0.000816251559083183	0.000207789379571343	AKT1/TNF/IL1B/IFNG	4	geneontology_Biological_Process	0.137931034482759
GO:0071897	DNA biosynthetic process	4/29	192/17913	0.000246310570932529	0.000816251559083183	0.000207789379571343	TP53/MAPK3/MAPK1/CDKN1A	4	geneontology_Biological_Process	0.137931034482759
GO:0006885	regulation of pH	3/29	76/17913	0.00024770898008828	0.000819910840268453	0.000208720905837606	MAPK3/MAPK1/BCL2	3	geneontology_Biological_Process	0.103448275862069
GO:0030279	negative regulation of ossification	3/29	77/17913	0.000257471198243855	0.000850204063395288	0.000216432511369865	TNF/BCL2/TGFB1	3	geneontology_Biological_Process	0.103448275862069
GO:0090398	cellular senescence	3/29	77/17913	0.000257471198243855	0.000850204063395288	0.000216432511369865	TP53/MAPK14/CDKN1A	3	geneontology_Biological_Process	0.103448275862069
GO:0010759	positive regulation of macrophage chemotaxis	2/29	15/17913	0.000262276301688145	0.000855929804221149	0.000217890086697658	MAPK3/MAPK14	2	geneontology_Biological_Process	0.0689655172413793
GO:0015732	prostaglandin transport	2/29	15/17913	0.000262276301688145	0.000855929804221149	0.000217890086697658	IL1B/NOS2	2	geneontology_Biological_Process	0.0689655172413793
GO:0030730	sequestering of triglyceride	2/29	15/17913	0.000262276301688145	0.000855929804221149	0.000217890086697658	TNF/IL1B	2	geneontology_Biological_Process	0.0689655172413793
GO:0044144	modulation of growth of symbiont involved in interaction with host	2/29	15/17913	0.000262276301688145	0.000855929804221149	0.000217890086697658	TNF/IL10	2	geneontology_Biological_Process	0.0689655172413793
GO:0051709	regulation of killing of cells of other organism	2/29	15/17913	0.000262276301688145	0.000855929804221149	0.000217890086697658	IFNG/NOS2	2	geneontology_Biological_Process	0.0689655172413793
GO:1900119	positive regulation of execution phase of apoptosis	2/29	15/17913	0.000262276301688145	0.000855929804221149	0.000217890086697658	TP53/IL6	2	geneontology_Biological_Process	0.0689655172413793
GO:1900451	positive regulation of glutamate receptor signaling pathway	2/29	15/17913	0.000262276301688145	0.000855929804221149	0.000217890086697658	IFNG/CCL2	2	geneontology_Biological_Process	0.0689655172413793
GO:1903350	response to dopamine	2/29	15/17913	0.000262276301688145	0.000855929804221149	0.000217890086697658	MAPK3/MAPK1	2	geneontology_Biological_Process	0.0689655172413793
GO:1903358	regulation of Golgi organization	2/29	15/17913	0.000262276301688145	0.000855929804221149	0.000217890086697658	MAPK3/MAPK1	2	geneontology_Biological_Process	0.0689655172413793
GO:2000402	negative regulation of lymphocyte migration	2/29	15/17913	0.000262276301688145	0.000855929804221149	0.000217890086697658	AKT1/CCL2	2	geneontology_Biological_Process	0.0689655172413793
GO:0051271	negative regulation of cellular component movement	5/29	365/17913	0.000271271164377943	0.0008842488130074	0.00022509912562725	AKT1/IL4/BCL2/TGFB1/CCL2	5	geneontology_Biological_Process	0.172413793103448
GO:0032869	cellular response to insulin stimulus	4/29	197/17913	0.000271685309921395	0.00088456420414828	0.000225179413289499	AKT1/STAT1/SP1/IL1B	4	geneontology_Biological_Process	0.137931034482759
GO:0010876	lipid localization	5/29	366/17913	0.000274719688999901	0.000893399968777976	0.000227428692975414	IL6/AKT1/TNF/IL1B/NOS2	5	geneontology_Biological_Process	0.172413793103448
GO:0061333	renal tubule morphogenesis	3/29	79/17913	0.000277735459044614	0.00090215469039317	0.000229657341916415	BCL2/TGFB1/VEGFA	3	geneontology_Biological_Process	0.103448275862069
GO:0002064	epithelial cell development	4/29	199/17913	0.000282343556913924	0.000914990108278031	0.000232924794810263	ESR1/TNF/CDKN1A/IL1B	4	geneontology_Biological_Process	0.137931034482759
GO:0034764	positive regulation of transmembrane transport	4/29	199/17913	0.000282343556913924	0.000914990108278031	0.000232924794810263	MAPK14/AKT1/IFNG/CCL2	4	geneontology_Biological_Process	0.137931034482759
GO:0007254	JNK cascade	4/29	200/17913	0.000287784042169112	0.000930457222187142	0.000236862186374382	AKT1/TNF/EGFR/IL1B	4	geneontology_Biological_Process	0.137931034482759
GO:0030073	insulin secretion	4/29	200/17913	0.000287784042169112	0.000930457222187142	0.000236862186374382	TNF/IL1B/IFNG/NOS2	4	geneontology_Biological_Process	0.137931034482759
GO:0030004	cellular monovalent inorganic cation homeostasis	3/29	80/17913	0.000288242843127754	0.000930860722823929	0.000236964903662995	MAPK3/MAPK1/BCL2	3	geneontology_Biological_Process	0.103448275862069
GO:0032755	positive regulation of interleukin-6 production	3/29	81/17913	0.000299003935045704	0.000962570783216181	0.000245037186896949	IL6/TNF/IL1B	3	geneontology_Biological_Process	0.103448275862069
GO:0046849	bone remodeling	3/29	81/17913	0.000299003935045704	0.000962570783216181	0.000245037186896949	IL6/EGFR/TGFB1	3	geneontology_Biological_Process	0.103448275862069
GO:0031649	heat generation	2/29	16/17913	0.000299443440634528	0.000962570783216181	0.000245037186896949	TNF/IL1B	2	geneontology_Biological_Process	0.0689655172413793
GO:0044117	growth of symbiont in host	2/29	16/17913	0.000299443440634528	0.000962570783216181	0.000245037186896949	TNF/IL10	2	geneontology_Biological_Process	0.0689655172413793
GO:0031341	regulation of cell killing	3/29	82/17913	0.000310021372207436	0.000990622538803107	0.00025217819241716	IL4/IFNG/NOS2	3	geneontology_Biological_Process	0.103448275862069
GO:0045445	myoblast differentiation	3/29	82/17913	0.000310021372207436	0.000990622538803107	0.00025217819241716	MAPK14/TNF/TGFB1	3	geneontology_Biological_Process	0.103448275862069
GO:0071158	positive regulation of cell cycle arrest	3/29	82/17913	0.000310021372207436	0.000990622538803107	0.00025217819241716	TP53/CDKN1A/TGFB1	3	geneontology_Biological_Process	0.103448275862069
GO:1901992	positive regulation of mitotic cell cycle phase transition	3/29	82/17913	0.000310021372207436	0.000990622538803107	0.00025217819241716	AKT1/EGFR/TGFB1	3	geneontology_Biological_Process	0.103448275862069
GO:2000106	regulation of leukocyte apoptotic process	3/29	82/17913	0.000310021372207436	0.000990622538803107	0.00025217819241716	TP53/IL10/IL2	3	geneontology_Biological_Process	0.103448275862069
GO:0006006	glucose metabolic process	4/29	204/17913	0.00031030264670797	0.000990622538803107	0.00025217819241716	TP53/MAPK14/AKT1/TNF	4	geneontology_Biological_Process	0.137931034482759
GO:0040013	negative regulation of locomotion	5/29	377/17913	0.000314901523633032	0.00100415394320968	0.000255622819376928	AKT1/IL4/BCL2/TGFB1/CCL2	5	geneontology_Biological_Process	0.172413793103448
GO:0008625	extrinsic apoptotic signaling pathway via death domain receptors	3/29	83/17913	0.000321297778767989	0.00102337932505873	0.000260516935807068	TNF/BCL2/BCL2L1	3	geneontology_Biological_Process	0.103448275862069
GO:0042446	hormone biosynthetic process	3/29	84/17913	0.000332835765667266	0.00105530520923171	0.000268644160301464	TNF/IL1B/IFNG	3	geneontology_Biological_Process	0.103448275862069
GO:0051781	positive regulation of cell division	3/29	84/17913	0.000332835765667266	0.00105530520923171	0.000268644160301464	IL1B/TGFB1/VEGFA	3	geneontology_Biological_Process	0.103448275862069
GO:0071621	granulocyte chemotaxis	3/29	84/17913	0.000332835765667266	0.00105530520923171	0.000268644160301464	MAPK3/MAPK14/CXCL8	3	geneontology_Biological_Process	0.103448275862069
GO:0090559	regulation of membrane permeability	3/29	84/17913	0.000332835765667266	0.00105530520923171	0.000268644160301464	TP53/BCL2/BCL2L1	3	geneontology_Biological_Process	0.103448275862069
GO:0002902	regulation of B cell apoptotic process	2/29	17/17913	0.000339028579177485	0.00105808807409591	0.000269352581323304	IL10/IL2	2	geneontology_Biological_Process	0.0689655172413793
GO:0006978	DNA damage response, signal transduction by p53 class mediator resulting in transcription of p21 class mediator	2/29	17/17913	0.000339028579177485	0.00105808807409591	0.000269352581323304	TP53/CDKN1A	2	geneontology_Biological_Process	0.0689655172413793
GO:0010224	response to UV-B	2/29	17/17913	0.000339028579177485	0.00105808807409591	0.000269352581323304	CDKN1A/BCL2	2	geneontology_Biological_Process	0.0689655172413793
GO:0010715	regulation of extracellular matrix disassembly	2/29	17/17913	0.000339028579177485	0.00105808807409591	0.000269352581323304	IL6/TGFB1	2	geneontology_Biological_Process	0.0689655172413793
GO:0032930	positive regulation of superoxide anion generation	2/29	17/17913	0.000339028579177485	0.00105808807409591	0.000269352581323304	EGFR/TGFB1	2	geneontology_Biological_Process	0.0689655172413793
GO:0035729	cellular response to hepatocyte growth factor stimulus	2/29	17/17913	0.000339028579177485	0.00105808807409591	0.000269352581323304	CREB1/IL10	2	geneontology_Biological_Process	0.0689655172413793
GO:0043923	positive regulation by host of viral transcription	2/29	17/17913	0.000339028579177485	0.00105808807409591	0.000269352581323304	JUN/SP1	2	geneontology_Biological_Process	0.0689655172413793
GO:0044110	growth involved in symbiotic interaction	2/29	17/17913	0.000339028579177485	0.00105808807409591	0.000269352581323304	TNF/IL10	2	geneontology_Biological_Process	0.0689655172413793
GO:0044116	growth of symbiont involved in interaction with host	2/29	17/17913	0.000339028579177485	0.00105808807409591	0.000269352581323304	TNF/IL10	2	geneontology_Biological_Process	0.0689655172413793
GO:0060438	trachea development	2/29	17/17913	0.000339028579177485	0.00105808807409591	0.000269352581323304	MAPK3/MAPK1	2	geneontology_Biological_Process	0.0689655172413793
GO:1904355	positive regulation of telomere capping	2/29	17/17913	0.000339028579177485	0.00105808807409591	0.000269352581323304	MAPK3/MAPK1	2	geneontology_Biological_Process	0.0689655172413793
GO:1905331	negative regulation of morphogenesis of an epithelium	2/29	17/17913	0.000339028579177485	0.00105808807409591	0.000269352581323304	STAT1/TNF	2	geneontology_Biological_Process	0.0689655172413793
GO:2000641	regulation of early endosome to late endosome transport	2/29	17/17913	0.000339028579177485	0.00105808807409591	0.000269352581323304	MAPK3/MAPK1	2	geneontology_Biological_Process	0.0689655172413793
GO:2000811	negative regulation of anoikis	2/29	17/17913	0.000339028579177485	0.00105808807409591	0.000269352581323304	MCL1/BCL2	2	geneontology_Biological_Process	0.0689655172413793
GO:0001942	hair follicle development	3/29	85/17913	0.00034463793066872	0.00107439140131289	0.000273502843836945	TNF/EGFR/BCL2	3	geneontology_Biological_Process	0.103448275862069
GO:0071456	cellular response to hypoxia	4/29	210/17913	0.000346418124400534	0.00107873442760256	0.00027460842792821	TP53/AKT1/BCL2/VEGFA	4	geneontology_Biological_Process	0.137931034482759
GO:0051701	interaction with host	4/29	211/17913	0.000352718012423919	0.00109712622837663	0.000279290343484165	EGFR/CXCL8/TGFB1/BCL2L1	4	geneontology_Biological_Process	0.137931034482759
GO:2000177	regulation of neural precursor cell proliferation	3/29	86/17913	0.000356706858397981	0.00110829656003921	0.000282133923088939	TP53/TGFB1/VEGFA	3	geneontology_Biological_Process	0.103448275862069
GO:0043583	ear development	4/29	212/17913	0.000359099738751117	0.00111448883285007	0.000283710261303778	MAPK3/MAPK1/BCL2/TGFB1	4	geneontology_Biological_Process	0.137931034482759
GO:0022404	molting cycle process	3/29	87/17913	0.000369045120381365	0.00114154134351039	0.000290596893670238	TNF/EGFR/BCL2	3	geneontology_Biological_Process	0.103448275862069
GO:0022405	hair cycle process	3/29	87/17913	0.000369045120381365	0.00114154134351039	0.000290596893670238	TNF/EGFR/BCL2	3	geneontology_Biological_Process	0.103448275862069
GO:0098773	skin epidermis development	3/29	87/17913	0.000369045120381365	0.00114154134351039	0.000290596893670238	TNF/EGFR/BCL2	3	geneontology_Biological_Process	0.103448275862069
GO:0001894	tissue homeostasis	4/29	214/17913	0.000372111198545034	0.0011497493462805	0.000292686366926541	IL6/EGFR/BCL2/VEGFA	4	geneontology_Biological_Process	0.137931034482759
GO:0042445	hormone metabolic process	4/29	215/17913	0.000378742180498217	0.00116604851247511	0.000296835570187988	ESR1/TNF/IL1B/IFNG	4	geneontology_Biological_Process	0.137931034482759
GO:0010888	negative regulation of lipid storage	2/29	18/17913	0.000381024333433359	0.00116604851247511	0.000296835570187988	IL6/TNF	2	geneontology_Biological_Process	0.0689655172413793
GO:0042772	DNA damage response, signal transduction resulting in transcription	2/29	18/17913	0.000381024333433359	0.00116604851247511	0.000296835570187988	TP53/CDKN1A	2	geneontology_Biological_Process	0.0689655172413793
GO:0043011	myeloid dendritic cell differentiation	2/29	18/17913	0.000381024333433359	0.00116604851247511	0.000296835570187988	IL4/TGFB1	2	geneontology_Biological_Process	0.0689655172413793
GO:0060749	mammary gland alveolus development	2/29	18/17913	0.000381024333433359	0.00116604851247511	0.000296835570187988	ESR1/VEGFA	2	geneontology_Biological_Process	0.0689655172413793
GO:0061377	mammary gland lobule development	2/29	18/17913	0.000381024333433359	0.00116604851247511	0.000296835570187988	ESR1/VEGFA	2	geneontology_Biological_Process	0.0689655172413793
GO:0070230	positive regulation of lymphocyte apoptotic process	2/29	18/17913	0.000381024333433359	0.00116604851247511	0.000296835570187988	TP53/IL10	2	geneontology_Biological_Process	0.0689655172413793
GO:2000647	negative regulation of stem cell proliferation	2/29	18/17913	0.000381024333433359	0.00116604851247511	0.000296835570187988	TP53/TGFB1	2	geneontology_Biological_Process	0.0689655172413793
GO:0007409	axonogenesis	5/29	393/17913	0.000381151846022543	0.00116604851247511	0.000296835570187988	MAPK3/MAPK1/CREB1/BCL2/VEGFA	5	geneontology_Biological_Process	0.172413793103448
GO:0002456	T cell mediated immunity	3/29	88/17913	0.000381655275084324	0.00116630838997808	0.000296901726000501	IL6/IL4/IL1B	3	geneontology_Biological_Process	0.103448275862069
GO:0043393	regulation of protein binding	4/29	217/17913	0.000392257776701599	0.00119739586381967	0.00030481552025927	MAPK3/AKT1/IL10/BCL2	4	geneontology_Biological_Process	0.137931034482759
GO:0006417	regulation of translation	5/29	397/17913	0.000399253220016666	0.00121741654724994	0.000309912092930131	MAPK3/MAPK1/IL6/AKT1/TNF	5	geneontology_Biological_Process	0.172413793103448
GO:0052547	regulation of peptidase activity	5/29	398/17913	0.000403878784926059	0.00123017505310265	0.000313159966684112	MAPK3/MAPK14/AKT1/TNF/VEGFA	5	geneontology_Biological_Process	0.172413793103448
GO:0015908	fatty acid transport	3/29	90/17913	0.000407701431436389	0.00123911002117036	0.000315434500129859	AKT1/IL1B/NOS2	3	geneontology_Biological_Process	0.103448275862069
GO:0035710	CD4-positive, alpha-beta T cell activation	3/29	90/17913	0.000407701431436389	0.00123911002117036	0.000315434500129859	IL6/IL2/IFNG	3	geneontology_Biological_Process	0.103448275862069
GO:0036294	cellular response to decreased oxygen levels	4/29	220/17913	0.000413174663416329	0.00125437667422801	0.000319320861303298	TP53/AKT1/BCL2/VEGFA	4	geneontology_Biological_Process	0.137931034482759
GO:0010717	regulation of epithelial to mesenchymal transition	3/29	91/17913	0.000421142485056718	0.00126267820716172	0.000321434144100239	IL6/IL1B/TGFB1	3	geneontology_Biological_Process	0.103448275862069
GO:0045833	negative regulation of lipid metabolic process	3/29	91/17913	0.000421142485056718	0.00126267820716172	0.000321434144100239	AKT1/TNF/IL1B	3	geneontology_Biological_Process	0.103448275862069
GO:0060333	interferon-gamma-mediated signaling pathway	3/29	91/17913	0.000421142485056718	0.00126267820716172	0.000321434144100239	TP53/STAT1/IFNG	3	geneontology_Biological_Process	0.103448275862069
GO:1901655	cellular response to ketone	3/29	91/17913	0.000421142485056718	0.00126267820716172	0.000321434144100239	AKT1/EGFR/TGFB1	3	geneontology_Biological_Process	0.103448275862069
GO:0002363	alpha-beta T cell lineage commitment	2/29	19/17913	0.000425423335674508	0.00126267820716172	0.000321434144100239	IL6/BCL2	2	geneontology_Biological_Process	0.0689655172413793
GO:0002544	chronic inflammatory response	2/29	19/17913	0.000425423335674508	0.00126267820716172	0.000321434144100239	TNF/IL10	2	geneontology_Biological_Process	0.0689655172413793
GO:0002726	positive regulation of T cell cytokine production	2/29	19/17913	0.000425423335674508	0.00126267820716172	0.000321434144100239	IL6/IL1B	2	geneontology_Biological_Process	0.0689655172413793
GO:0002922	positive regulation of humoral immune response	2/29	19/17913	0.000425423335674508	0.00126267820716172	0.000321434144100239	TNF/IL1B	2	geneontology_Biological_Process	0.0689655172413793
GO:0010523	negative regulation of calcium ion transport into cytosol	2/29	19/17913	0.000425423335674508	0.00126267820716172	0.000321434144100239	BCL2/TGFB1	2	geneontology_Biological_Process	0.0689655172413793
GO:0030949	positive regulation of vascular endothelial growth factor receptor signaling pathway	2/29	19/17913	0.000425423335674508	0.00126267820716172	0.000321434144100239	IL1B/VEGFA	2	geneontology_Biological_Process	0.0689655172413793
GO:0031281	positive regulation of cyclase activity	2/29	19/17913	0.000425423335674508	0.00126267820716172	0.000321434144100239	MAPK3/MAPK14	2	geneontology_Biological_Process	0.0689655172413793
GO:0032700	negative regulation of interleukin-17 production	2/29	19/17913	0.000425423335674508	0.00126267820716172	0.000321434144100239	TGFB1/IFNG	2	geneontology_Biological_Process	0.0689655172413793
GO:0035728	response to hepatocyte growth factor	2/29	19/17913	0.000425423335674508	0.00126267820716172	0.000321434144100239	CREB1/IL10	2	geneontology_Biological_Process	0.0689655172413793
GO:0051412	response to corticosterone	2/29	19/17913	0.000425423335674508	0.00126267820716172	0.000321434144100239	FOS/CDKN1A	2	geneontology_Biological_Process	0.0689655172413793
GO:0051767	nitric-oxide synthase biosynthetic process	2/29	19/17913	0.000425423335674508	0.00126267820716172	0.000321434144100239	STAT1/CCL2	2	geneontology_Biological_Process	0.0689655172413793
GO:0051769	regulation of nitric-oxide synthase biosynthetic process	2/29	19/17913	0.000425423335674508	0.00126267820716172	0.000321434144100239	STAT1/CCL2	2	geneontology_Biological_Process	0.0689655172413793
GO:0060716	labyrinthine layer blood vessel development	2/29	19/17913	0.000425423335674508	0.00126267820716172	0.000321434144100239	MAPK1/AKT1	2	geneontology_Biological_Process	0.0689655172413793
GO:0090190	positive regulation of branching involved in ureteric bud morphogenesis	2/29	19/17913	0.000425423335674508	0.00126267820716172	0.000321434144100239	TGFB1/VEGFA	2	geneontology_Biological_Process	0.0689655172413793
GO:0090201	negative regulation of release of cytochrome c from mitochondria	2/29	19/17913	0.000425423335674508	0.00126267820716172	0.000321434144100239	AKT1/BCL2L1	2	geneontology_Biological_Process	0.0689655172413793
GO:1900409	positive regulation of cellular response to oxidative stress	2/29	19/17913	0.000425423335674508	0.00126267820716172	0.000321434144100239	TNF/MCL1	2	geneontology_Biological_Process	0.0689655172413793
GO:2000010	positive regulation of protein localization to cell surface	2/29	19/17913	0.000425423335674508	0.00126267820716172	0.000321434144100239	AKT1/TNF	2	geneontology_Biological_Process	0.0689655172413793
GO:0006469	negative regulation of protein kinase activity	4/29	222/17913	0.000427555590121003	0.00126765684007153	0.000322701531625483	AKT1/CASP3/CDKN1A/IL1B	4	geneontology_Biological_Process	0.137931034482759
GO:0048010	vascular endothelial growth factor receptor signaling pathway	3/29	93/17913	0.00044887307624671	0.00132944661370837	0.000338431068169677	MAPK14/IL1B/VEGFA	3	geneontology_Biological_Process	0.103448275862069
GO:2001243	negative regulation of intrinsic apoptotic signaling pathway	3/29	94/17913	0.000463167588453338	0.00137032703717564	0.000348837808266342	AKT1/BCL2/BCL2L1	3	geneontology_Biological_Process	0.103448275862069
GO:0030878	thyroid gland development	2/29	20/17913	0.000472218234299155	0.00139119684882848	0.000354150539576756	MAPK3/MAPK1	2	geneontology_Biological_Process	0.0689655172413793
GO:0043369	CD4-positive or CD8-positive, alpha-beta T cell lineage commitment	2/29	20/17913	0.000472218234299155	0.00139119684882848	0.000354150539576756	IL6/BCL2	2	geneontology_Biological_Process	0.0689655172413793
GO:0060602	branch elongation of an epithelium	2/29	20/17913	0.000472218234299155	0.00139119684882848	0.000354150539576756	ESR1/TGFB1	2	geneontology_Biological_Process	0.0689655172413793
GO:1905523	positive regulation of macrophage migration	2/29	20/17913	0.000472218234299155	0.00139119684882848	0.000354150539576756	MAPK3/MAPK14	2	geneontology_Biological_Process	0.0689655172413793
GO:0072507	divalent inorganic cation homeostasis	5/29	412/17913	0.000473003153197547	0.0013920377908781	0.000354364614300169	ESR1/IL2/EGFR/BCL2/TGFB1	5	geneontology_Biological_Process	0.172413793103448
GO:0045069	regulation of viral genome replication	3/29	95/17913	0.000477751540143338	0.00140452905314291	0.000357544457091505	TNF/BCL2/CXCL8	3	geneontology_Biological_Process	0.103448275862069
GO:0010594	regulation of endothelial cell migration	4/29	231/17913	0.000496735592618919	0.00145880094481446	0.000371360201236927	AKT1/SP1/TGFB1/VEGFA	4	geneontology_Biological_Process	0.137931034482759
GO:1901989	positive regulation of cell cycle phase transition	3/29	97/17913	0.000507797570660911	0.00148971771519154	0.000379230540305212	AKT1/EGFR/TGFB1	3	geneontology_Biological_Process	0.103448275862069
GO:0016570	histone modification	5/29	420/17913	0.000516324318005529	0.00151313972059034	0.000385192971759064	TP53/MAPK3/IL1B/TGFB1/VEGFA	5	geneontology_Biological_Process	0.172413793103448
GO:0010829	negative regulation of glucose transmembrane transport	2/29	21/17913	0.000521401693801279	0.00151843941549025	0.000386542090548383	TNF/IL1B	2	geneontology_Biological_Process	0.0689655172413793
GO:0032928	regulation of superoxide anion generation	2/29	21/17913	0.000521401693801279	0.00151843941549025	0.000386542090548383	EGFR/TGFB1	2	geneontology_Biological_Process	0.0689655172413793
GO:0036499	PERK-mediated unfolded protein response	2/29	21/17913	0.000521401693801279	0.00151843941549025	0.000386542090548383	CXCL8/CCL2	2	geneontology_Biological_Process	0.0689655172413793
GO:0046827	positive regulation of protein export from nucleus	2/29	21/17913	0.000521401693801279	0.00151843941549025	0.000386542090548383	TP53/IL1B	2	geneontology_Biological_Process	0.0689655172413793
GO:1902884	positive regulation of response to oxidative stress	2/29	21/17913	0.000521401693801279	0.00151843941549025	0.000386542090548383	TNF/MCL1	2	geneontology_Biological_Process	0.0689655172413793
GO:1903055	positive regulation of extracellular matrix organization	2/29	21/17913	0.000521401693801279	0.00151843941549025	0.000386542090548383	IL6/TGFB1	2	geneontology_Biological_Process	0.0689655172413793
GO:0001657	ureteric bud development	3/29	98/17913	0.000523264522072515	0.00152227371922349	0.000387518171494204	BCL2/TGFB1/VEGFA	3	geneontology_Biological_Process	0.103448275862069
GO:1901991	negative regulation of mitotic cell cycle phase transition	4/29	235/17913	0.000529910629805636	0.00154000096482618	0.000392030914317544	TP53/CDKN1A/BCL2/CCL2	4	geneontology_Biological_Process	0.137931034482759
GO:0048525	negative regulation of viral process	3/29	99/17913	0.000539030658210592	0.00156162000460803	0.000397534373163299	JUN/STAT1/TNF	3	geneontology_Biological_Process	0.103448275862069
GO:0072163	mesonephric epithelium development	3/29	99/17913	0.000539030658210592	0.00156162000460803	0.000397534373163299	BCL2/TGFB1/VEGFA	3	geneontology_Biological_Process	0.103448275862069
GO:0072164	mesonephric tubule development	3/29	99/17913	0.000539030658210592	0.00156162000460803	0.000397534373163299	BCL2/TGFB1/VEGFA	3	geneontology_Biological_Process	0.103448275862069
GO:0048863	stem cell differentiation	4/29	237/17913	0.000547077713209955	0.00158164479949808	0.000402631992469437	TP53/MAPK3/MAPK1/ESR1	4	geneontology_Biological_Process	0.137931034482759
GO:0071453	cellular response to oxygen levels	4/29	237/17913	0.000547077713209955	0.00158164479949808	0.000402631992469437	TP53/AKT1/BCL2/VEGFA	4	geneontology_Biological_Process	0.137931034482759
GO:0097530	granulocyte migration	3/29	100/17913	0.000555098383776134	0.00160317015086434	0.000408111601489081	MAPK3/MAPK14/CXCL8	3	geneontology_Biological_Process	0.103448275862069
GO:0019318	hexose metabolic process	4/29	239/17913	0.000564638020239865	0.00162903329441874	0.000414695462179001	TP53/MAPK14/AKT1/TNF	4	geneontology_Biological_Process	0.137931034482759
GO:0070498	interleukin-1-mediated signaling pathway	3/29	101/17913	0.000571470090900965	0.00163780240219688	0.000416927773338885	MAPK3/IL6/IL1B	3	geneontology_Biological_Process	0.103448275862069
GO:0006309	apoptotic DNA fragmentation	2/29	22/17913	0.000572966394740567	0.00163780240219688	0.000416927773338885	IL6/CASP3	2	geneontology_Biological_Process	0.0689655172413793
GO:0032682	negative regulation of chemokine production	2/29	22/17913	0.000572966394740567	0.00163780240219688	0.000416927773338885	IL6/IL10	2	geneontology_Biological_Process	0.0689655172413793
GO:0050927	positive regulation of positive chemotaxis	2/29	22/17913	0.000572966394740567	0.00163780240219688	0.000416927773338885	CXCL8/VEGFA	2	geneontology_Biological_Process	0.0689655172413793
GO:0051000	positive regulation of nitric-oxide synthase activity	2/29	22/17913	0.000572966394740567	0.00163780240219688	0.000416927773338885	AKT1/TNF	2	geneontology_Biological_Process	0.0689655172413793
GO:0060444	branching involved in mammary gland duct morphogenesis	2/29	22/17913	0.000572966394740567	0.00163780240219688	0.000416927773338885	ESR1/TGFB1	2	geneontology_Biological_Process	0.0689655172413793
GO:0061213	positive regulation of mesonephros development	2/29	22/17913	0.000572966394740567	0.00163780240219688	0.000416927773338885	TGFB1/VEGFA	2	geneontology_Biological_Process	0.0689655172413793
GO:1901522	positive regulation of transcription from RNA polymerase II promoter involved in cellular response to chemical stimulus	2/29	22/17913	0.000572966394740567	0.00163780240219688	0.000416927773338885	TP53/VEGFA	2	geneontology_Biological_Process	0.0689655172413793
GO:1903077	negative regulation of protein localization to plasma membrane	2/29	22/17913	0.000572966394740567	0.00163780240219688	0.000416927773338885	TGFB1/BCL2L1	2	geneontology_Biological_Process	0.0689655172413793
GO:0038093	Fc receptor signaling pathway	4/29	241/17913	0.000582596698643274	0.00166362397450697	0.000423501051429645	JUN/MAPK3/MAPK1/FOS	4	geneontology_Biological_Process	0.137931034482759
GO:0006275	regulation of DNA replication	3/29	102/17913	0.000588148159184943	0.00167775733843238	0.000427098916436623	JUN/TP53/EGFR	3	geneontology_Biological_Process	0.103448275862069
GO:0016569	covalent chromatin modification	5/29	433/17913	0.000593039218718498	0.00168997985947695	0.000430210347019985	TP53/MAPK3/IL1B/TGFB1/VEGFA	5	geneontology_Biological_Process	0.172413793103448
GO:0002768	immune response-regulating cell surface receptor signaling pathway	5/29	434/17913	0.000599277193400634	0.00170601178550313	0.000434291520189267	JUN/MAPK3/MAPK1/FOS/BCL2	5	geneontology_Biological_Process	0.172413793103448
GO:0001823	mesonephros development	3/29	103/17913	0.000605134955733095	0.00171917545527843	0.000437642534646822	BCL2/TGFB1/VEGFA	3	geneontology_Biological_Process	0.103448275862069
GO:0032091	negative regulation of protein binding	3/29	103/17913	0.000605134955733095	0.00171917545527843	0.000437642534646822	MAPK3/AKT1/IL10	3	geneontology_Biological_Process	0.103448275862069
GO:0006310	DNA recombination	4/29	244/17913	0.000610292946444031	0.00173030156840235	0.000440474857742975	IL10/IL2/IL4/TGFB1	4	geneontology_Biological_Process	0.137931034482759
GO:0033673	negative regulation of kinase activity	4/29	244/17913	0.000610292946444031	0.00173030156840235	0.000440474857742975	AKT1/CASP3/CDKN1A/IL1B	4	geneontology_Biological_Process	0.137931034482759
GO:0042742	defense response to bacterium	4/29	245/17913	0.000619729807439014	0.00175527131436233	0.000446831290344347	IL6/TNF/IL10/NOS2	4	geneontology_Biological_Process	0.137931034482759
GO:0001783	B cell apoptotic process	2/29	23/17913	0.000626905033712401	0.00176483265551158	0.00044926527668491	IL10/IL2	2	geneontology_Biological_Process	0.0689655172413793
GO:0010758	regulation of macrophage chemotaxis	2/29	23/17913	0.000626905033712401	0.00176483265551158	0.00044926527668491	MAPK3/MAPK14	2	geneontology_Biological_Process	0.0689655172413793
GO:0050926	regulation of positive chemotaxis	2/29	23/17913	0.000626905033712401	0.00176483265551158	0.00044926527668491	CXCL8/VEGFA	2	geneontology_Biological_Process	0.0689655172413793
GO:0051968	positive regulation of synaptic transmission, glutamatergic	2/29	23/17913	0.000626905033712401	0.00176483265551158	0.00044926527668491	EGFR/CCL2	2	geneontology_Biological_Process	0.0689655172413793
GO:0071677	positive regulation of mononuclear cell migration	2/29	23/17913	0.000626905033712401	0.00176483265551158	0.00044926527668491	TNF/TGFB1	2	geneontology_Biological_Process	0.0689655172413793
GO:0090189	regulation of branching involved in ureteric bud morphogenesis	2/29	23/17913	0.000626905033712401	0.00176483265551158	0.00044926527668491	TGFB1/VEGFA	2	geneontology_Biological_Process	0.0689655172413793
GO:0003007	heart morphogenesis	4/29	249/17913	0.000658518403440898	0.001851958416135	0.000471444478112662	JUN/TP53/TGFB1/VEGFA	4	geneontology_Biological_Process	0.137931034482759
GO:0090596	sensory organ morphogenesis	4/29	250/17913	0.000668479082396638	0.00187807580911233	0.000478093061900821	MAPK3/MAPK1/BCL2/VEGFA	4	geneontology_Biological_Process	0.137931034482759
GO:0062014	negative regulation of small molecule metabolic process	3/29	107/17913	0.000676216331421103	0.00189790021719095	0.000483139669664306	TP53/AKT1/TGFB1	3	geneontology_Biological_Process	0.103448275862069
GO:0002861	regulation of inflammatory response to antigenic stimulus	2/29	24/17913	0.000683210323317919	0.00190220496612092	0.000484235509665364	TNF/IL10	2	geneontology_Biological_Process	0.0689655172413793
GO:0032800	receptor biosynthetic process	2/29	24/17913	0.000683210323317919	0.00190220496612092	0.000484235509665364	TNF/IL10	2	geneontology_Biological_Process	0.0689655172413793
GO:0036003	positive regulation of transcription from RNA polymerase II promoter in response to stress	2/29	24/17913	0.000683210323317919	0.00190220496612092	0.000484235509665364	TP53/VEGFA	2	geneontology_Biological_Process	0.0689655172413793
GO:0046697	decidualization	2/29	24/17913	0.000683210323317919	0.00190220496612092	0.000484235509665364	MAPK3/MAPK1	2	geneontology_Biological_Process	0.0689655172413793
GO:1903649	regulation of cytoplasmic transport	2/29	24/17913	0.000683210323317919	0.00190220496612092	0.000484235509665364	MAPK3/MAPK1	2	geneontology_Biological_Process	0.0689655172413793
GO:1904376	negative regulation of protein localization to cell periphery	2/29	24/17913	0.000683210323317919	0.00190220496612092	0.000484235509665364	TGFB1/BCL2L1	2	geneontology_Biological_Process	0.0689655172413793
GO:2000178	negative regulation of neural precursor cell proliferation	2/29	24/17913	0.000683210323317919	0.00190220496612092	0.000484235509665364	TP53/TGFB1	2	geneontology_Biological_Process	0.0689655172413793
GO:2000209	regulation of anoikis	2/29	24/17913	0.000683210323317919	0.00190220496612092	0.000484235509665364	MCL1/BCL2	2	geneontology_Biological_Process	0.0689655172413793
GO:0071156	regulation of cell cycle arrest	3/29	108/17913	0.00069478184113487	0.00193249200722843	0.00049194554146959	TP53/CDKN1A/TGFB1	3	geneontology_Biological_Process	0.103448275862069
GO:1901988	negative regulation of cell cycle phase transition	4/29	254/17913	0.000709395405284283	0.00197117148008704	0.000501791995761775	TP53/CDKN1A/BCL2/CCL2	4	geneontology_Biological_Process	0.137931034482759
GO:0042303	molting cycle	3/29	109/17913	0.000713670021420097	0.00197713553647894	0.000503310237979644	TNF/EGFR/BCL2	3	geneontology_Biological_Process	0.103448275862069
GO:0042633	hair cycle	3/29	109/17913	0.000713670021420097	0.00197713553647894	0.000503310237979644	TNF/EGFR/BCL2	3	geneontology_Biological_Process	0.103448275862069
GO:0043618	regulation of transcription from RNA polymerase II promoter in response to stress	3/29	109/17913	0.000713670021420097	0.00197713553647894	0.000503310237979644	JUN/TP53/VEGFA	3	geneontology_Biological_Process	0.103448275862069
GO:0007204	positive regulation of cytosolic calcium ion concentration	4/29	255/17913	0.000719896141236365	0.00199240371958863	0.000507196988651346	ESR1/IL2/BCL2/TGFB1	4	geneontology_Biological_Process	0.137931034482759
GO:0045408	regulation of interleukin-6 biosynthetic process	2/29	25/17913	0.000741874992134097	0.00204107167135018	0.0005195861637641	TNF/IL1B	2	geneontology_Biological_Process	0.0689655172413793
GO:0045662	negative regulation of myoblast differentiation	2/29	25/17913	0.000741874992134097	0.00204107167135018	0.0005195861637641	TNF/TGFB1	2	geneontology_Biological_Process	0.0689655172413793
GO:0060330	regulation of response to interferon-gamma	2/29	25/17913	0.000741874992134097	0.00204107167135018	0.0005195861637641	STAT1/IFNG	2	geneontology_Biological_Process	0.0689655172413793
GO:0060334	regulation of interferon-gamma-mediated signaling pathway	2/29	25/17913	0.000741874992134097	0.00204107167135018	0.0005195861637641	STAT1/IFNG	2	geneontology_Biological_Process	0.0689655172413793
GO:1900739	regulation of protein insertion into mitochondrial membrane involved in apoptotic signaling pathway	2/29	25/17913	0.000741874992134097	0.00204107167135018	0.0005195861637641	TP53/BCL2	2	geneontology_Biological_Process	0.0689655172413793
GO:1900740	positive regulation of protein insertion into mitochondrial membrane involved in apoptotic signaling pathway	2/29	25/17913	0.000741874992134097	0.00204107167135018	0.0005195861637641	TP53/BCL2	2	geneontology_Biological_Process	0.0689655172413793
GO:0046620	regulation of organ growth	3/29	111/17913	0.000752423504198885	0.00206601409478058	0.000525935640995643	MAPK1/MAPK14/AKT1	3	geneontology_Biological_Process	0.103448275862069
GO:0051149	positive regulation of muscle cell differentiation	3/29	111/17913	0.000752423504198885	0.00206601409478058	0.000525935640995643	MAPK14/BCL2/TGFB1	3	geneontology_Biological_Process	0.103448275862069
GO:1903510	mucopolysaccharide metabolic process	3/29	112/17913	0.00077229333147366	0.00211848574293021	0.000539293105484093	AKT1/IL1B/TGFB1	3	geneontology_Biological_Process	0.103448275862069
GO:0010508	positive regulation of autophagy	3/29	113/17913	0.000792494878954966	0.00217176325235741	0.000552855714346268	MAPK3/IL4/IFNG	3	geneontology_Biological_Process	0.103448275862069
GO:0002053	positive regulation of mesenchymal cell proliferation	2/29	26/17913	0.000802891784683908	0.00217671148240667	0.000554115362356087	STAT1/VEGFA	2	geneontology_Biological_Process	0.0689655172413793
GO:0007263	nitric oxide mediated signal transduction	2/29	26/17913	0.000802891784683908	0.00217671148240667	0.000554115362356087	EGFR/VEGFA	2	geneontology_Biological_Process	0.0689655172413793
GO:0032647	regulation of interferon-alpha production	2/29	26/17913	0.000802891784683908	0.00217671148240667	0.000554115362356087	STAT1/IL10	2	geneontology_Biological_Process	0.0689655172413793
GO:0033598	mammary gland epithelial cell proliferation	2/29	26/17913	0.000802891784683908	0.00217671148240667	0.000554115362356087	MAPK1/ESR1	2	geneontology_Biological_Process	0.0689655172413793
GO:0061217	regulation of mesonephros development	2/29	26/17913	0.000802891784683908	0.00217671148240667	0.000554115362356087	TGFB1/VEGFA	2	geneontology_Biological_Process	0.0689655172413793
GO:0072539	T-helper 17 cell differentiation	2/29	26/17913	0.000802891784683908	0.00217671148240667	0.000554115362356087	IL6/IL2	2	geneontology_Biological_Process	0.0689655172413793
GO:1902175	regulation of oxidative stress-induced intrinsic apoptotic signaling pathway	2/29	26/17913	0.000802891784683908	0.00217671148240667	0.000554115362356087	AKT1/MCL1	2	geneontology_Biological_Process	0.0689655172413793
GO:1903203	regulation of oxidative stress-induced neuron death	2/29	26/17913	0.000802891784683908	0.00217671148240667	0.000554115362356087	IL10/MCL1	2	geneontology_Biological_Process	0.0689655172413793
GO:1904353	regulation of telomere capping	2/29	26/17913	0.000802891784683908	0.00217671148240667	0.000554115362356087	MAPK3/MAPK1	2	geneontology_Biological_Process	0.0689655172413793
GO:1905048	regulation of metallopeptidase activity	2/29	26/17913	0.000802891784683908	0.00217671148240667	0.000554115362356087	MAPK3/MAPK14	2	geneontology_Biological_Process	0.0689655172413793
GO:2000679	positive regulation of transcription regulatory region DNA binding	2/29	26/17913	0.000802891784683908	0.00217671148240667	0.000554115362356087	TGFB1/IFNG	2	geneontology_Biological_Process	0.0689655172413793
GO:1901222	regulation of NIK/NF-kappaB signaling	3/29	114/17913	0.000813030378730956	0.00220205604035294	0.000560567209109165	TNF/EGFR/IL1B	3	geneontology_Biological_Process	0.103448275862069
GO:0007005	mitochondrion organization	5/29	466/17913	0.000826377436972879	0.00223603292897419	0.00056921654830835	JUN/TP53/AKT1/BCL2/BCL2L1	5	geneontology_Biological_Process	0.172413793103448
GO:0007173	epidermal growth factor receptor signaling pathway	3/29	115/17913	0.000833902050833887	0.0022498402862285	0.00057273142330671	AKT1/EGFR/TGFB1	3	geneontology_Biological_Process	0.103448275862069
GO:0043620	regulation of DNA-templated transcription in response to stress	3/29	115/17913	0.000833902050833887	0.0022498402862285	0.00057273142330671	JUN/TP53/VEGFA	3	geneontology_Biological_Process	0.103448275862069
GO:0051153	regulation of striated muscle cell differentiation	3/29	115/17913	0.000833902050833887	0.0022498402862285	0.00057273142330671	MAPK14/BCL2/TGFB1	3	geneontology_Biological_Process	0.103448275862069
GO:0043270	positive regulation of ion transport	4/29	266/17913	0.000842805572547732	0.00227166260221521	0.000578286629234624	AKT1/IL1B/IFNG/CCL2	4	geneontology_Biological_Process	0.137931034482759
GO:0072089	stem cell proliferation	3/29	116/17913	0.000855112103276155	0.00230260621432913	0.000586163801279561	TP53/TGFB1/VEGFA	3	geneontology_Biological_Process	0.103448275862069
GO:0001782	B cell homeostasis	2/29	27/17913	0.00086625346140651	0.00231249846450186	0.000588682025597891	CASP3/BCL2	2	geneontology_Biological_Process	0.0689655172413793
GO:0009651	response to salt stress	2/29	27/17913	0.00086625346140651	0.00231249846450186	0.000588682025597891	TP53/TNF	2	geneontology_Biological_Process	0.0689655172413793
GO:0035902	response to immobilization stress	2/29	27/17913	0.00086625346140651	0.00231249846450186	0.000588682025597891	FOS/TGFB1	2	geneontology_Biological_Process	0.0689655172413793
GO:0036475	neuron death in response to oxidative stress	2/29	27/17913	0.00086625346140651	0.00231249846450186	0.000588682025597891	IL10/MCL1	2	geneontology_Biological_Process	0.0689655172413793
GO:0042226	interleukin-6 biosynthetic process	2/29	27/17913	0.00086625346140651	0.00231249846450186	0.000588682025597891	TNF/IL1B	2	geneontology_Biological_Process	0.0689655172413793
GO:0043921	modulation by host of viral transcription	2/29	27/17913	0.00086625346140651	0.00231249846450186	0.000588682025597891	JUN/SP1	2	geneontology_Biological_Process	0.0689655172413793
GO:0045907	positive regulation of vasoconstriction	2/29	27/17913	0.00086625346140651	0.00231249846450186	0.000588682025597891	AKT1/EGFR	2	geneontology_Biological_Process	0.0689655172413793
GO:0052472	modulation by host of symbiont transcription	2/29	27/17913	0.00086625346140651	0.00231249846450186	0.000588682025597891	JUN/SP1	2	geneontology_Biological_Process	0.0689655172413793
GO:2000191	regulation of fatty acid transport	2/29	27/17913	0.00086625346140651	0.00231249846450186	0.000588682025597891	AKT1/IL1B	2	geneontology_Biological_Process	0.0689655172413793
GO:0034605	cellular response to heat	3/29	117/17913	0.000876662732086245	0.00233804692279844	0.000595185778318942	MAPK3/MAPK1/CDKN1A	3	geneontology_Biological_Process	0.103448275862069
GO:0000737	DNA catabolic process, endonucleolytic	2/29	28/17913	0.000931952798627504	0.00247131536610357	0.000629111308803583	IL6/CASP3	2	geneontology_Biological_Process	0.0689655172413793
GO:0032607	interferon-alpha production	2/29	28/17913	0.000931952798627504	0.00247131536610357	0.000629111308803583	STAT1/IL10	2	geneontology_Biological_Process	0.0689655172413793
GO:0045737	positive regulation of cyclin-dependent protein serine/threonine kinase activity	2/29	28/17913	0.000931952798627504	0.00247131536610357	0.000629111308803583	AKT1/EGFR	2	geneontology_Biological_Process	0.0689655172413793
GO:0050869	negative regulation of B cell activation	2/29	28/17913	0.000931952798627504	0.00247131536610357	0.000629111308803583	IL10/CASP3	2	geneontology_Biological_Process	0.0689655172413793
GO:0052312	modulation of transcription in other organism involved in symbiotic interaction	2/29	28/17913	0.000931952798627504	0.00247131536610357	0.000629111308803583	JUN/SP1	2	geneontology_Biological_Process	0.0689655172413793
GO:2000108	positive regulation of leukocyte apoptotic process	2/29	28/17913	0.000931952798627504	0.00247131536610357	0.000629111308803583	TP53/IL10	2	geneontology_Biological_Process	0.0689655172413793
GO:0051101	regulation of DNA binding	3/29	120/17913	0.000943379858002118	0.00249923922457405	0.000636219756147116	JUN/TGFB1/IFNG	3	geneontology_Biological_Process	0.103448275862069
GO:0043542	endothelial cell migration	4/29	275/17913	0.000953872888279336	0.0025246379293775	0.000642685386814887	AKT1/SP1/TGFB1/VEGFA	4	geneontology_Biological_Process	0.137931034482759
GO:0072655	establishment of protein localization to mitochondrion	3/29	121/17913	0.000966314514143532	0.00255163646522738	0.000649558279063794	TP53/AKT1/BCL2	3	geneontology_Biological_Process	0.103448275862069
GO:0001822	kidney development	4/29	276/17913	0.000966820275306822	0.00255163646522738	0.000649558279063794	STAT1/BCL2/TGFB1/VEGFA	4	geneontology_Biological_Process	0.137931034482759
GO:0090287	regulation of cellular response to growth factor stimulus	4/29	276/17913	0.000966820275306822	0.00255163646522738	0.000649558279063794	TP53/IL1B/TGFB1/VEGFA	4	geneontology_Biological_Process	0.137931034482759
GO:0005996	monosaccharide metabolic process	4/29	277/17913	0.000979891387043188	0.00258124508099184	0.000657095607270032	TP53/MAPK14/AKT1/TNF	4	geneontology_Biological_Process	0.137931034482759
GO:0034330	cell junction organization	4/29	277/17913	0.000979891387043188	0.00258124508099184	0.000657095607270032	TNF/BCL2/TGFB1/VEGFA	4	geneontology_Biological_Process	0.137931034482759
GO:0007006	mitochondrial membrane organization	3/29	122/17913	0.000989600548288806	0.00260190257366123	0.000662354289520015	TP53/BCL2/BCL2L1	3	geneontology_Biological_Process	0.103448275862069
GO:0055067	monovalent inorganic cation homeostasis	3/29	122/17913	0.000989600548288806	0.00260190257366123	0.000662354289520015	MAPK3/MAPK1/BCL2	3	geneontology_Biological_Process	0.103448275862069
GO:0001844	protein insertion into mitochondrial membrane involved in apoptotic signaling pathway	2/29	29/17913	0.000999982588529221	0.00261195077247511	0.000664912212961767	TP53/BCL2	2	geneontology_Biological_Process	0.0689655172413793
GO:0003401	axis elongation	2/29	29/17913	0.000999982588529221	0.00261195077247511	0.000664912212961767	ESR1/TGFB1	2	geneontology_Biological_Process	0.0689655172413793
GO:0010800	positive regulation of peptidyl-threonine phosphorylation	2/29	29/17913	0.000999982588529221	0.00261195077247511	0.000664912212961767	MAPK1/TGFB1	2	geneontology_Biological_Process	0.0689655172413793
GO:0070102	interleukin-6-mediated signaling pathway	2/29	29/17913	0.000999982588529221	0.00261195077247511	0.000664912212961767	IL6/STAT1	2	geneontology_Biological_Process	0.0689655172413793
GO:0071549	cellular response to dexamethasone stimulus	2/29	29/17913	0.000999982588529221	0.00261195077247511	0.000664912212961767	EGFR/TGFB1	2	geneontology_Biological_Process	0.0689655172413793
GO:0072538	T-helper 17 type immune response	2/29	29/17913	0.000999982588529221	0.00261195077247511	0.000664912212961767	IL6/IL2	2	geneontology_Biological_Process	0.0689655172413793
GO:2000778	positive regulation of interleukin-6 secretion	2/29	29/17913	0.000999982588529221	0.00261195077247511	0.000664912212961767	TNF/IL1B	2	geneontology_Biological_Process	0.0689655172413793
GO:0042177	negative regulation of protein catabolic process	3/29	124/17913	0.00103723523835729	0.00270671779897169	0.000689036616058362	IL10/EGFR/NOS2	3	geneontology_Biological_Process	0.103448275862069
GO:0022411	cellular component disassembly	5/29	492/17913	0.00105407926969977	0.00274810002306199	0.000699571097215938	TP53/IL6/TNF/CASP3/TGFB1	5	geneontology_Biological_Process	0.172413793103448
GO:0070585	protein localization to mitochondrion	3/29	125/17913	0.00106158810886245	0.00276508977513987	0.000703896099727785	TP53/AKT1/BCL2	3	geneontology_Biological_Process	0.103448275862069
GO:0060603	mammary gland duct morphogenesis	2/29	30/17913	0.00107033563912108	0.00278267297222989	0.000708372172788302	ESR1/TGFB1	2	geneontology_Biological_Process	0.0689655172413793
GO:1905476	negative regulation of protein localization to membrane	2/29	30/17913	0.00107033563912108	0.00278267297222989	0.000708372172788302	TGFB1/BCL2L1	2	geneontology_Biological_Process	0.0689655172413793
GO:0051592	response to calcium ion	3/29	126/17913	0.00108630078660587	0.00281892019764484	0.000717599461111788	JUN/FOS/EGFR	3	geneontology_Biological_Process	0.103448275862069
GO:0060359	response to ammonium ion	3/29	126/17913	0.00108630078660587	0.00281892019764484	0.000717599461111788	MAPK3/MAPK1/CASP3	3	geneontology_Biological_Process	0.103448275862069
GO:0050878	regulation of body fluid levels	5/29	499/17913	0.00112268042779226	0.00291061428116933	0.000740941599345883	MAPK3/MAPK1/IL6/CREB1/VEGFA	5	geneontology_Biological_Process	0.172413793103448
GO:0048667	cell morphogenesis involved in neuron differentiation	5/29	500/17913	0.00113274595669814	0.00293398046590866	0.000746889820792943	MAPK3/MAPK1/CREB1/BCL2/VEGFA	5	geneontology_Biological_Process	0.172413793103448
GO:0002724	regulation of T cell cytokine production	2/29	31/17913	0.00114300477420998	0.00293599475181862	0.000747402588229467	IL6/IL1B	2	geneontology_Biological_Process	0.0689655172413793
GO:0030262	apoptotic nuclear changes	2/29	31/17913	0.00114300477420998	0.00293599475181862	0.000747402588229467	IL6/CASP3	2	geneontology_Biological_Process	0.0689655172413793
GO:0043330	response to exogenous dsRNA	2/29	31/17913	0.00114300477420998	0.00293599475181862	0.000747402588229467	MAPK3/MAPK1	2	geneontology_Biological_Process	0.0689655172413793
GO:0045648	positive regulation of erythrocyte differentiation	2/29	31/17913	0.00114300477420998	0.00293599475181862	0.000747402588229467	MAPK14/STAT1	2	geneontology_Biological_Process	0.0689655172413793
GO:0051204	protein insertion into mitochondrial membrane	2/29	31/17913	0.00114300477420998	0.00293599475181862	0.000747402588229467	TP53/BCL2	2	geneontology_Biological_Process	0.0689655172413793
GO:0051385	response to mineralocorticoid	2/29	31/17913	0.00114300477420998	0.00293599475181862	0.000747402588229467	FOS/CDKN1A	2	geneontology_Biological_Process	0.0689655172413793
GO:1902230	negative regulation of intrinsic apoptotic signaling pathway in response to DNA damage	2/29	31/17913	0.00114300477420998	0.00293599475181862	0.000747402588229467	BCL2/BCL2L1	2	geneontology_Biological_Process	0.0689655172413793
GO:1902253	regulation of intrinsic apoptotic signaling pathway by p53 class mediator	2/29	31/17913	0.00114300477420998	0.00293599475181862	0.000747402588229467	TP53/BCL2	2	geneontology_Biological_Process	0.0689655172413793
GO:1903978	regulation of microglial cell activation	2/29	31/17913	0.00114300477420998	0.00293599475181862	0.000747402588229467	IL6/TNF	2	geneontology_Biological_Process	0.0689655172413793
GO:0051480	regulation of cytosolic calcium ion concentration	4/29	289/17913	0.00114663480484578	0.00294260699917605	0.000749085837419846	ESR1/IL2/BCL2/TGFB1	4	geneontology_Biological_Process	0.137931034482759
GO:0072001	renal system development	4/29	291/17913	0.00117624661094133	0.0030158227274089	0.00076772402631526	STAT1/BCL2/TGFB1/VEGFA	4	geneontology_Biological_Process	0.137931034482759
GO:0006766	vitamin metabolic process	3/29	130/17913	0.00118879095922663	0.00304238788187751	0.000774486594672801	TNF/IL1B/IFNG	3	geneontology_Biological_Process	0.103448275862069
GO:0046683	response to organophosphorus	3/29	130/17913	0.00118879095922663	0.00304238788187751	0.000774486594672801	STAT1/FOS/IL1B	3	geneontology_Biological_Process	0.103448275862069
GO:0042770	signal transduction in response to DNA damage	3/29	131/17913	0.00121533361402928	0.00310001658137372	0.000789156865841743	TP53/MAPK14/CDKN1A	3	geneontology_Biological_Process	0.103448275862069
GO:0033028	myeloid cell apoptotic process	2/29	32/17913	0.00121798283337073	0.00310001658137372	0.000789156865841743	IL6/BCL2	2	geneontology_Biological_Process	0.0689655172413793
GO:0040018	positive regulation of multicellular organism growth	2/29	32/17913	0.00121798283337073	0.00310001658137372	0.000789156865841743	CREB1/BCL2	2	geneontology_Biological_Process	0.0689655172413793
GO:0043368	positive T cell selection	2/29	32/17913	0.00121798283337073	0.00310001658137372	0.000789156865841743	IL6/BCL2	2	geneontology_Biological_Process	0.0689655172413793
GO:0060674	placenta blood vessel development	2/29	32/17913	0.00121798283337073	0.00310001658137372	0.000789156865841743	MAPK1/AKT1	2	geneontology_Biological_Process	0.0689655172413793
GO:1900745	positive regulation of p38MAPK cascade	2/29	32/17913	0.00121798283337073	0.00310001658137372	0.000789156865841743	IL1B/VEGFA	2	geneontology_Biological_Process	0.0689655172413793
GO:0043010	camera-type eye development	4/29	295/17913	0.00123707871334731	0.00314574669169612	0.000800798168263624	JUN/EGFR/TGFB1/VEGFA	4	geneontology_Biological_Process	0.137931034482759
GO:0000077	DNA damage checkpoint	3/29	133/17913	0.00126953724149035	0.00322534210759673	0.000821060404706135	TP53/MAPK14/CDKN1A	3	geneontology_Biological_Process	0.103448275862069
GO:0006308	DNA catabolic process	2/29	33/17913	0.00129526267191659	0.00327279879114374	0.000833141232878546	IL6/CASP3	2	geneontology_Biological_Process	0.0689655172413793
GO:0006921	cellular component disassembly involved in execution phase of apoptosis	2/29	33/17913	0.00129526267191659	0.00327279879114374	0.000833141232878546	IL6/CASP3	2	geneontology_Biological_Process	0.0689655172413793
GO:0016242	negative regulation of macroautophagy	2/29	33/17913	0.00129526267191659	0.00327279879114374	0.000833141232878546	TP53/AKT1	2	geneontology_Biological_Process	0.0689655172413793
GO:0030947	regulation of vascular endothelial growth factor receptor signaling pathway	2/29	33/17913	0.00129526267191659	0.00327279879114374	0.000833141232878546	IL1B/VEGFA	2	geneontology_Biological_Process	0.0689655172413793
GO:0042554	superoxide anion generation	2/29	33/17913	0.00129526267191659	0.00327279879114374	0.000833141232878546	EGFR/TGFB1	2	geneontology_Biological_Process	0.0689655172413793
GO:0045736	negative regulation of cyclin-dependent protein serine/threonine kinase activity	2/29	33/17913	0.00129526267191659	0.00327279879114374	0.000833141232878546	CASP3/CDKN1A	2	geneontology_Biological_Process	0.0689655172413793
GO:0010464	regulation of mesenchymal cell proliferation	2/29	34/17913	0.00137483716086978	0.00344884893550323	0.000877957502890932	STAT1/VEGFA	2	geneontology_Biological_Process	0.0689655172413793
GO:0032212	positive regulation of telomere maintenance via telomerase	2/29	34/17913	0.00137483716086978	0.00344884893550323	0.000877957502890932	MAPK3/MAPK1	2	geneontology_Biological_Process	0.0689655172413793
GO:0032735	positive regulation of interleukin-12 production	2/29	34/17913	0.00137483716086978	0.00344884893550323	0.000877957502890932	MAPK14/IFNG	2	geneontology_Biological_Process	0.0689655172413793
GO:0048566	embryonic digestive tract development	2/29	34/17913	0.00137483716086978	0.00344884893550323	0.000877957502890932	TNF/CXCL8	2	geneontology_Biological_Process	0.0689655172413793
GO:0071868	cellular response to monoamine stimulus	2/29	34/17913	0.00137483716086978	0.00344884893550323	0.000877957502890932	MAPK3/MAPK1	2	geneontology_Biological_Process	0.0689655172413793
GO:0071870	cellular response to catecholamine stimulus	2/29	34/17913	0.00137483716086978	0.00344884893550323	0.000877957502890932	MAPK3/MAPK1	2	geneontology_Biological_Process	0.0689655172413793
GO:1901030	positive regulation of mitochondrial outer membrane permeabilization involved in apoptotic signaling pathway	2/29	34/17913	0.00137483716086978	0.00344884893550323	0.000877957502890932	TP53/BCL2	2	geneontology_Biological_Process	0.0689655172413793
GO:1904030	negative regulation of cyclin-dependent protein kinase activity	2/29	34/17913	0.00137483716086978	0.00344884893550323	0.000877957502890932	CASP3/CDKN1A	2	geneontology_Biological_Process	0.0689655172413793
GO:0008584	male gonad development	3/29	137/17913	0.00138247362507246	0.00345866606200804	0.000880456603324994	ESR1/BCL2/BCL2L1	3	geneontology_Biological_Process	0.103448275862069
GO:0015718	monocarboxylic acid transport	3/29	137/17913	0.00138247362507246	0.00345866606200804	0.000880456603324994	AKT1/IL1B/NOS2	3	geneontology_Biological_Process	0.103448275862069
GO:0050709	negative regulation of protein secretion	3/29	137/17913	0.00138247362507246	0.00345866606200804	0.000880456603324994	TNF/IL10/IL1B	3	geneontology_Biological_Process	0.103448275862069
GO:0046546	development of primary male sexual characteristics	3/29	138/17913	0.00141166279425595	0.00352852395299671	0.000898240003142328	ESR1/BCL2/BCL2L1	3	geneontology_Biological_Process	0.103448275862069
GO:0002831	regulation of response to biotic stimulus	3/29	139/17913	0.0014412378922164	0.00359922043513182	0.000916236879224538	MAPK3/STAT1/IL1B	3	geneontology_Biological_Process	0.103448275862069
GO:0010762	regulation of fibroblast migration	2/29	35/17913	0.00145669918693208	0.00361515639713243	0.000920293623276209	AKT1/TGFB1	2	geneontology_Biological_Process	0.0689655172413793
GO:0010831	positive regulation of myotube differentiation	2/29	35/17913	0.00145669918693208	0.00361515639713243	0.000920293623276209	MAPK14/BCL2	2	geneontology_Biological_Process	0.0689655172413793
GO:0030224	monocyte differentiation	2/29	35/17913	0.00145669918693208	0.00361515639713243	0.000920293623276209	JUN/VEGFA	2	geneontology_Biological_Process	0.0689655172413793
GO:0045740	positive regulation of DNA replication	2/29	35/17913	0.00145669918693208	0.00361515639713243	0.000920293623276209	JUN/EGFR	2	geneontology_Biological_Process	0.0689655172413793
GO:0071312	cellular response to alkaloid	2/29	35/17913	0.00145669918693208	0.00361515639713243	0.000920293623276209	CASP3/BCL2L1	2	geneontology_Biological_Process	0.0689655172413793
GO:1903131	mononuclear cell differentiation	2/29	35/17913	0.00145669918693208	0.00361515639713243	0.000920293623276209	JUN/VEGFA	2	geneontology_Biological_Process	0.0689655172413793
GO:2000310	regulation of NMDA receptor activity	2/29	35/17913	0.00145669918693208	0.00361515639713243	0.000920293623276209	IFNG/CCL2	2	geneontology_Biological_Process	0.0689655172413793
GO:0001837	epithelial to mesenchymal transition	3/29	140/17913	0.0014712008490843	0.00364789747900173	0.000928628368873214	IL6/IL1B/TGFB1	3	geneontology_Biological_Process	0.103448275862069
GO:0031570	DNA integrity checkpoint	3/29	141/17913	0.00150155358384434	0.00371984874504371	0.000946944669484056	TP53/MAPK14/CDKN1A	3	geneontology_Biological_Process	0.103448275862069
GO:0002792	negative regulation of peptide secretion	3/29	142/17913	0.00153229800436934	0.0037835468593775	0.000963160003482497	TNF/IL10/IL1B	3	geneontology_Biological_Process	0.103448275862069
GO:0007612	learning	3/29	142/17913	0.00153229800436934	0.0037835468593775	0.000963160003482497	JUN/FOS/CREB1	3	geneontology_Biological_Process	0.103448275862069
GO:0002251	organ or tissue specific immune response	2/29	36/17913	0.00154084165245549	0.0037835468593775	0.000963160003482497	IL6/NOS2	2	geneontology_Biological_Process	0.0689655172413793
GO:0010742	macrophage derived foam cell differentiation	2/29	36/17913	0.00154084165245549	0.0037835468593775	0.000963160003482497	STAT1/TGFB1	2	geneontology_Biological_Process	0.0689655172413793
GO:0032885	regulation of polysaccharide biosynthetic process	2/29	36/17913	0.00154084165245549	0.0037835468593775	0.000963160003482497	AKT1/TGFB1	2	geneontology_Biological_Process	0.0689655172413793
GO:0046825	regulation of protein export from nucleus	2/29	36/17913	0.00154084165245549	0.0037835468593775	0.000963160003482497	TP53/IL1B	2	geneontology_Biological_Process	0.0689655172413793
GO:0051973	positive regulation of telomerase activity	2/29	36/17913	0.00154084165245549	0.0037835468593775	0.000963160003482497	MAPK3/MAPK1	2	geneontology_Biological_Process	0.0689655172413793
GO:0090077	foam cell differentiation	2/29	36/17913	0.00154084165245549	0.0037835468593775	0.000963160003482497	STAT1/TGFB1	2	geneontology_Biological_Process	0.0689655172413793
GO:1905332	positive regulation of morphogenesis of an epithelium	2/29	36/17913	0.00154084165245549	0.0037835468593775	0.000963160003482497	TGFB1/VEGFA	2	geneontology_Biological_Process	0.0689655172413793
GO:1905521	regulation of macrophage migration	2/29	36/17913	0.00154084165245549	0.0037835468593775	0.000963160003482497	MAPK3/MAPK14	2	geneontology_Biological_Process	0.0689655172413793
GO:0043271	negative regulation of ion transport	3/29	144/17913	0.00159496947884914	0.00390613351278783	0.000994366320177892	AKT1/BCL2/TGFB1	3	geneontology_Biological_Process	0.103448275862069
GO:0043467	regulation of generation of precursor metabolites and energy	3/29	144/17913	0.00159496947884914	0.00390613351278783	0.000994366320177892	TP53/AKT1/NOS2	3	geneontology_Biological_Process	0.103448275862069
GO:0061351	neural precursor cell proliferation	3/29	144/17913	0.00159496947884914	0.00390613351278783	0.000994366320177892	TP53/TGFB1/VEGFA	3	geneontology_Biological_Process	0.103448275862069
GO:0014074	response to purine-containing compound	3/29	145/17913	0.00162690029329435	0.00396084417814479	0.00100829376090857	STAT1/FOS/IL1B	3	geneontology_Biological_Process	0.103448275862069
GO:0034405	response to fluid shear stress	2/29	37/17913	0.00162725747541291	0.00396084417814479	0.00100829376090857	AKT1/TGFB1	2	geneontology_Biological_Process	0.0689655172413793
GO:0045124	regulation of bone resorption	2/29	37/17913	0.00162725747541291	0.00396084417814479	0.00100829376090857	IL6/EGFR	2	geneontology_Biological_Process	0.0689655172413793
GO:0046006	regulation of activated T cell proliferation	2/29	37/17913	0.00162725747541291	0.00396084417814479	0.00100829376090857	IL2/CASP3	2	geneontology_Biological_Process	0.0689655172413793
GO:0046326	positive regulation of glucose import	2/29	37/17913	0.00162725747541291	0.00396084417814479	0.00100829376090857	MAPK14/AKT1	2	geneontology_Biological_Process	0.0689655172413793
GO:0050691	regulation of defense response to virus by host	2/29	37/17913	0.00162725747541291	0.00396084417814479	0.00100829376090857	STAT1/IL1B	2	geneontology_Biological_Process	0.0689655172413793
GO:1904358	positive regulation of telomere maintenance via telomere lengthening	2/29	37/17913	0.00162725747541291	0.00396084417814479	0.00100829376090857	MAPK3/MAPK1	2	geneontology_Biological_Process	0.0689655172413793
GO:0071236	cellular response to antibiotic	3/29	147/17913	0.00169196139544348	0.00411115641595552	0.00104655805123563	TP53/IL6/IL10	3	geneontology_Biological_Process	0.103448275862069
GO:1903900	regulation of viral life cycle	3/29	147/17913	0.00169196139544348	0.00411115641595552	0.00104655805123563	TNF/BCL2/CXCL8	3	geneontology_Biological_Process	0.103448275862069
GO:0002711	positive regulation of T cell mediated immunity	2/29	38/17913	0.00171593958936889	0.00414053994421741	0.00105403807995865	IL6/IL1B	2	geneontology_Biological_Process	0.0689655172413793
GO:0016572	histone phosphorylation	2/29	38/17913	0.00171593958936889	0.00414053994421741	0.00105403807995865	MAPK3/IL1B	2	geneontology_Biological_Process	0.0689655172413793
GO:0042149	cellular response to glucose starvation	2/29	38/17913	0.00171593958936889	0.00414053994421741	0.00105403807995865	TP53/BCL2	2	geneontology_Biological_Process	0.0689655172413793
GO:0043331	response to dsRNA	2/29	38/17913	0.00171593958936889	0.00414053994421741	0.00105403807995865	MAPK3/MAPK1	2	geneontology_Biological_Process	0.0689655172413793
GO:0045022	early endosome to late endosome transport	2/29	38/17913	0.00171593958936889	0.00414053994421741	0.00105403807995865	MAPK3/MAPK1	2	geneontology_Biological_Process	0.0689655172413793
GO:0071867	response to monoamine	2/29	38/17913	0.00171593958936889	0.00414053994421741	0.00105403807995865	MAPK3/MAPK1	2	geneontology_Biological_Process	0.0689655172413793
GO:0071869	response to catecholamine	2/29	38/17913	0.00171593958936889	0.00414053994421741	0.00105403807995865	MAPK3/MAPK1	2	geneontology_Biological_Process	0.0689655172413793
GO:1904037	positive regulation of epithelial cell apoptotic process	2/29	38/17913	0.00171593958936889	0.00414053994421741	0.00105403807995865	IL6/CCL2	2	geneontology_Biological_Process	0.0689655172413793
GO:0007265	Ras protein signal transduction	4/29	324/17913	0.00174592482257035	0.00420561147839549	0.00107060303908695	JUN/TP53/MAPK14/CDKN1A	4	geneontology_Biological_Process	0.137931034482759
GO:0045861	negative regulation of proteolysis	4/29	324/17913	0.00174592482257035	0.00420561147839549	0.00107060303908695	TP53/AKT1/IL10/VEGFA	4	geneontology_Biological_Process	0.137931034482759
GO:0035264	multicellular organism growth	3/29	149/17913	0.00175863409288354	0.00422891563146369	0.00107653546941874	TP53/CREB1/BCL2	3	geneontology_Biological_Process	0.103448275862069
GO:0051092	positive regulation of NF-kappaB transcription factor activity	3/29	149/17913	0.00175863409288354	0.00422891563146369	0.00107653546941874	TNF/IL1B/TGFB1	3	geneontology_Biological_Process	0.103448275862069
GO:0022412	cellular process involved in reproduction in multicellular organism	4/29	326/17913	0.00178564862294609	0.00429017475185411	0.00109212992002329	AKT1/BCL2/TGFB1/BCL2L1	4	geneontology_Biological_Process	0.137931034482759
GO:0010661	positive regulation of muscle cell apoptotic process	2/29	39/17913	0.00180688094345044	0.0043188483614034	0.00109942922802708	TP53/IFNG	2	geneontology_Biological_Process	0.0689655172413793
GO:0045746	negative regulation of Notch signaling pathway	2/29	39/17913	0.00180688094345044	0.0043188483614034	0.00109942922802708	AKT1/EGFR	2	geneontology_Biological_Process	0.0689655172413793
GO:0060045	positive regulation of cardiac muscle cell proliferation	2/29	39/17913	0.00180688094345044	0.0043188483614034	0.00109942922802708	MAPK1/MAPK14	2	geneontology_Biological_Process	0.0689655172413793
GO:0071548	response to dexamethasone	2/29	39/17913	0.00180688094345044	0.0043188483614034	0.00109942922802708	EGFR/TGFB1	2	geneontology_Biological_Process	0.0689655172413793
GO:1902229	regulation of intrinsic apoptotic signaling pathway in response to DNA damage	2/29	39/17913	0.00180688094345044	0.0043188483614034	0.00109942922802708	BCL2/BCL2L1	2	geneontology_Biological_Process	0.0689655172413793
GO:2000008	regulation of protein localization to cell surface	2/29	39/17913	0.00180688094345044	0.0043188483614034	0.00109942922802708	AKT1/TNF	2	geneontology_Biological_Process	0.0689655172413793
GO:0016573	histone acetylation	3/29	151/17913	0.00182693299056908	0.00436303534251587	0.00111067770319177	MAPK3/IL1B/TGFB1	3	geneontology_Biological_Process	0.103448275862069
GO:0030168	platelet activation	3/29	152/17913	0.00186169678122848	0.00444225079561966	0.00113084321426459	MAPK3/MAPK1/IL6	3	geneontology_Biological_Process	0.103448275862069
GO:0031279	regulation of cyclase activity	2/29	40/17913	0.00190007450231783	0.00451449926509787	0.00114923517257793	MAPK3/MAPK14	2	geneontology_Biological_Process	0.0689655172413793
GO:0031952	regulation of protein autophosphorylation	2/29	40/17913	0.00190007450231783	0.00451449926509787	0.00114923517257793	JUN/VEGFA	2	geneontology_Biological_Process	0.0689655172413793
GO:0042036	negative regulation of cytokine biosynthetic process	2/29	40/17913	0.00190007450231783	0.00451449926509787	0.00114923517257793	IL6/IL10	2	geneontology_Biological_Process	0.0689655172413793
GO:0061028	establishment of endothelial barrier	2/29	40/17913	0.00190007450231783	0.00451449926509787	0.00114923517257793	TNF/IL1B	2	geneontology_Biological_Process	0.0689655172413793
GO:2000273	positive regulation of signaling receptor activity	2/29	40/17913	0.00190007450231783	0.00451449926509787	0.00114923517257793	IFNG/CCL2	2	geneontology_Biological_Process	0.0689655172413793
GO:0008361	regulation of cell size	3/29	154/17913	0.00193246198550379	0.00458753965383225	0.00116782872610917	AKT1/CREB1/VEGFA	3	geneontology_Biological_Process	0.103448275862069
GO:0032874	positive regulation of stress-activated MAPK cascade	3/29	155/17913	0.00196846694273561	0.00466903605906735	0.00118857488860363	TNF/IL1B/VEGFA	3	geneontology_Biological_Process	0.103448275862069
GO:0019048	modulation by virus of host morphology or physiology	2/29	41/17913	0.00199551324613554	0.0046972089670437	0.00119574673532659	TGFB1/BCL2L1	2	geneontology_Biological_Process	0.0689655172413793
GO:0032881	regulation of polysaccharide metabolic process	2/29	41/17913	0.00199551324613554	0.0046972089670437	0.00119574673532659	AKT1/TGFB1	2	geneontology_Biological_Process	0.0689655172413793
GO:0045601	regulation of endothelial cell differentiation	2/29	41/17913	0.00199551324613554	0.0046972089670437	0.00119574673532659	TNF/IL1B	2	geneontology_Biological_Process	0.0689655172413793
GO:0050434	positive regulation of viral transcription	2/29	41/17913	0.00199551324613554	0.0046972089670437	0.00119574673532659	JUN/SP1	2	geneontology_Biological_Process	0.0689655172413793
GO:0050798	activated T cell proliferation	2/29	41/17913	0.00199551324613554	0.0046972089670437	0.00119574673532659	IL2/CASP3	2	geneontology_Biological_Process	0.0689655172413793
GO:0090184	positive regulation of kidney development	2/29	41/17913	0.00199551324613554	0.0046972089670437	0.00119574673532659	TGFB1/VEGFA	2	geneontology_Biological_Process	0.0689655172413793
GO:0098927	vesicle-mediated transport between endosomal compartments	2/29	41/17913	0.00199551324613554	0.0046972089670437	0.00119574673532659	MAPK3/MAPK1	2	geneontology_Biological_Process	0.0689655172413793
GO:1903053	regulation of extracellular matrix organization	2/29	41/17913	0.00199551324613554	0.0046972089670437	0.00119574673532659	IL6/TGFB1	2	geneontology_Biological_Process	0.0689655172413793
GO:1904706	negative regulation of vascular smooth muscle cell proliferation	2/29	41/17913	0.00199551324613554	0.0046972089670437	0.00119574673532659	IL10/CDKN1A	2	geneontology_Biological_Process	0.0689655172413793
GO:0001906	cell killing	3/29	156/17913	0.00200488914801007	0.00470735135257293	0.00119832863544432	IL4/IFNG/NOS2	3	geneontology_Biological_Process	0.103448275862069
GO:0018393	internal peptidyl-lysine acetylation	3/29	156/17913	0.00200488914801007	0.00470735135257293	0.00119832863544432	MAPK3/IL1B/TGFB1	3	geneontology_Biological_Process	0.103448275862069
GO:0070304	positive regulation of stress-activated protein kinase signaling cascade	3/29	156/17913	0.00200488914801007	0.00470735135257293	0.00119832863544432	TNF/IL1B/VEGFA	3	geneontology_Biological_Process	0.103448275862069
GO:0030203	glycosaminoglycan metabolic process	3/29	157/17913	0.00204173034653816	0.00478981689882311	0.00121932150767918	AKT1/IL1B/TGFB1	3	geneontology_Biological_Process	0.103448275862069
GO:0006631	fatty acid metabolic process	4/29	339/17913	0.00205935409681151	0.00482709829084414	0.00122881205900665	MAPK3/MAPK14/AKT1/IL1B	4	geneontology_Biological_Process	0.137931034482759
GO:0002244	hematopoietic progenitor cell differentiation	3/29	158/17913	0.00207899227295095	0.00486903484429774	0.0012394876532233	TP53/BCL2/TGFB1	3	geneontology_Biological_Process	0.103448275862069
GO:0010863	positive regulation of phospholipase C activity	2/29	42/17913	0.00209319017054314	0.00489406124606018	0.00124585850842995	ESR1/EGFR	2	geneontology_Biological_Process	0.0689655172413793
GO:0032309	icosanoid secretion	2/29	42/17913	0.00209319017054314	0.00489406124606018	0.00124585850842995	IL1B/NOS2	2	geneontology_Biological_Process	0.0689655172413793
GO:0002673	regulation of acute inflammatory response	3/29	160/17913	0.00215478519525089	0.00502963679997004	0.00128037134937768	IL6/TNF/IL1B	3	geneontology_Biological_Process	0.103448275862069
GO:0046661	male sex differentiation	3/29	160/17913	0.00215478519525089	0.00502963679997004	0.00128037134937768	ESR1/BCL2/BCL2L1	3	geneontology_Biological_Process	0.103448275862069
GO:0010948	negative regulation of cell cycle process	4/29	344/17913	0.00217197474485906	0.00504771407673047	0.00128497319801195	TP53/CDKN1A/BCL2/CCL2	4	geneontology_Biological_Process	0.137931034482759
GO:0010761	fibroblast migration	2/29	43/17913	0.00219309828662633	0.00504771407673047	0.00128497319801195	AKT1/TGFB1	2	geneontology_Biological_Process	0.0689655172413793
GO:0010828	positive regulation of glucose transmembrane transport	2/29	43/17913	0.00219309828662633	0.00504771407673047	0.00128497319801195	MAPK14/AKT1	2	geneontology_Biological_Process	0.0689655172413793
GO:0010883	regulation of lipid storage	2/29	43/17913	0.00219309828662633	0.00504771407673047	0.00128497319801195	IL6/TNF	2	geneontology_Biological_Process	0.0689655172413793
GO:0031018	endocrine pancreas development	2/29	43/17913	0.00219309828662633	0.00504771407673047	0.00128497319801195	IL6/AKT1	2	geneontology_Biological_Process	0.0689655172413793
GO:0034105	positive regulation of tissue remodeling	2/29	43/17913	0.00219309828662633	0.00504771407673047	0.00128497319801195	IL2/EGFR	2	geneontology_Biological_Process	0.0689655172413793
GO:0060443	mammary gland morphogenesis	2/29	43/17913	0.00219309828662633	0.00504771407673047	0.00128497319801195	ESR1/TGFB1	2	geneontology_Biological_Process	0.0689655172413793
GO:0071364	cellular response to epidermal growth factor stimulus	2/29	43/17913	0.00219309828662633	0.00504771407673047	0.00128497319801195	AKT1/EGFR	2	geneontology_Biological_Process	0.0689655172413793
GO:0071715	icosanoid transport	2/29	43/17913	0.00219309828662633	0.00504771407673047	0.00128497319801195	IL1B/NOS2	2	geneontology_Biological_Process	0.0689655172413793
GO:0097028	dendritic cell differentiation	2/29	43/17913	0.00219309828662633	0.00504771407673047	0.00128497319801195	IL4/TGFB1	2	geneontology_Biological_Process	0.0689655172413793
GO:1901028	regulation of mitochondrial outer membrane permeabilization involved in apoptotic signaling pathway	2/29	43/17913	0.00219309828662633	0.00504771407673047	0.00128497319801195	TP53/BCL2	2	geneontology_Biological_Process	0.0689655172413793
GO:1901031	regulation of response to reactive oxygen species	2/29	43/17913	0.00219309828662633	0.00504771407673047	0.00128497319801195	TNF/IL10	2	geneontology_Biological_Process	0.0689655172413793
GO:1901571	fatty acid derivative transport	2/29	43/17913	0.00219309828662633	0.00504771407673047	0.00128497319801195	IL1B/NOS2	2	geneontology_Biological_Process	0.0689655172413793
GO:1990090	cellular response to nerve growth factor stimulus	2/29	43/17913	0.00219309828662633	0.00504771407673047	0.00128497319801195	AKT1/CREB1	2	geneontology_Biological_Process	0.0689655172413793
GO:0003018	vascular process in circulatory system	3/29	161/17913	0.00219331960779354	0.00504771407673047	0.00128497319801195	AKT1/EGFR/TGFB1	3	geneontology_Biological_Process	0.103448275862069
GO:0006022	aminoglycan metabolic process	3/29	161/17913	0.00219331960779354	0.00504771407673047	0.00128497319801195	AKT1/IL1B/TGFB1	3	geneontology_Biological_Process	0.103448275862069
GO:0006475	internal protein amino acid acetylation	3/29	161/17913	0.00219331960779354	0.00504771407673047	0.00128497319801195	MAPK3/IL1B/TGFB1	3	geneontology_Biological_Process	0.103448275862069
GO:0006611	protein export from nucleus	3/29	163/17913	0.00227167279887925	0.00522372284692777	0.00132977893559546	TP53/IL1B/TGFB1	3	geneontology_Biological_Process	0.103448275862069
GO:0002437	inflammatory response to antigenic stimulus	2/29	44/17913	0.00229523062088794	0.00525621014002849	0.00133804907536087	TNF/IL10	2	geneontology_Biological_Process	0.0689655172413793
GO:0002548	monocyte chemotaxis	2/29	44/17913	0.00229523062088794	0.00525621014002849	0.00133804907536087	IL6/CCL2	2	geneontology_Biological_Process	0.0689655172413793
GO:0030225	macrophage differentiation	2/29	44/17913	0.00229523062088794	0.00525621014002849	0.00133804907536087	TGFB1/VEGFA	2	geneontology_Biological_Process	0.0689655172413793
GO:0032965	regulation of collagen biosynthetic process	2/29	44/17913	0.00229523062088794	0.00525621014002849	0.00133804907536087	IL6/TGFB1	2	geneontology_Biological_Process	0.0689655172413793
GO:1900274	regulation of phospholipase C activity	2/29	44/17913	0.00229523062088794	0.00525621014002849	0.00133804907536087	ESR1/EGFR	2	geneontology_Biological_Process	0.0689655172413793
GO:0018394	peptidyl-lysine acetylation	3/29	164/17913	0.00231149493147441	0.00528911032349687	0.0013464243227152	MAPK3/IL1B/TGFB1	3	geneontology_Biological_Process	0.103448275862069
GO:0010463	mesenchymal cell proliferation	2/29	45/17913	0.00239958021521904	0.00546375004886885	0.00139088154889717	STAT1/VEGFA	2	geneontology_Biological_Process	0.0689655172413793
GO:0022602	ovulation cycle process	2/29	45/17913	0.00239958021521904	0.00546375004886885	0.00139088154889717	ESR1/CASP3	2	geneontology_Biological_Process	0.0689655172413793
GO:0032570	response to progesterone	2/29	45/17913	0.00239958021521904	0.00546375004886885	0.00139088154889717	FOS/TGFB1	2	geneontology_Biological_Process	0.0689655172413793
GO:0045058	T cell selection	2/29	45/17913	0.00239958021521904	0.00546375004886885	0.00139088154889717	IL6/BCL2	2	geneontology_Biological_Process	0.0689655172413793
GO:0046850	regulation of bone remodeling	2/29	45/17913	0.00239958021521904	0.00546375004886885	0.00139088154889717	IL6/EGFR	2	geneontology_Biological_Process	0.0689655172413793
GO:0070266	necroptotic process	2/29	45/17913	0.00239958021521904	0.00546375004886885	0.00139088154889717	TP53/TNF	2	geneontology_Biological_Process	0.0689655172413793
GO:0048469	cell maturation	3/29	167/17913	0.00243356338435992	0.00553660502221313	0.00140942790209116	CDKN1A/BCL2/VEGFA	3	geneontology_Biological_Process	0.103448275862069
GO:0010799	regulation of peptidyl-threonine phosphorylation	2/29	46/17913	0.00250614012687008	0.00566013981652101	0.00144087558262427	MAPK1/TGFB1	2	geneontology_Biological_Process	0.0689655172413793
GO:0030857	negative regulation of epithelial cell differentiation	2/29	46/17913	0.00250614012687008	0.00566013981652101	0.00144087558262427	STAT1/IFNG	2	geneontology_Biological_Process	0.0689655172413793
GO:0032757	positive regulation of interleukin-8 production	2/29	46/17913	0.00250614012687008	0.00566013981652101	0.00144087558262427	TNF/IL1B	2	geneontology_Biological_Process	0.0689655172413793
GO:0061912	selective autophagy	2/29	46/17913	0.00250614012687008	0.00566013981652101	0.00144087558262427	TP53/MAPK3	2	geneontology_Biological_Process	0.0689655172413793
GO:0070231	T cell apoptotic process	2/29	46/17913	0.00250614012687008	0.00566013981652101	0.00144087558262427	TP53/AKT1	2	geneontology_Biological_Process	0.0689655172413793
GO:0071354	cellular response to interleukin-6	2/29	46/17913	0.00250614012687008	0.00566013981652101	0.00144087558262427	IL6/STAT1	2	geneontology_Biological_Process	0.0689655172413793
GO:1900015	regulation of cytokine production involved in inflammatory response	2/29	46/17913	0.00250614012687008	0.00566013981652101	0.00144087558262427	MAPK14/NOS2	2	geneontology_Biological_Process	0.0689655172413793
GO:1900087	positive regulation of G1/S transition of mitotic cell cycle	2/29	46/17913	0.00250614012687008	0.00566013981652101	0.00144087558262427	AKT1/EGFR	2	geneontology_Biological_Process	0.0689655172413793
GO:1990089	response to nerve growth factor	2/29	46/17913	0.00250614012687008	0.00566013981652101	0.00144087558262427	AKT1/CREB1	2	geneontology_Biological_Process	0.0689655172413793
GO:0050728	negative regulation of inflammatory response	3/29	170/17913	0.00255956927077961	0.00577474788735537	0.00147005082849981	IL10/IL2/IL4	3	geneontology_Biological_Process	0.103448275862069
GO:0019932	second-messenger-mediated signaling	4/29	360/17913	0.00256102920300367	0.00577474788735537	0.00147005082849981	TNF/EGFR/CXCL8/VEGFA	4	geneontology_Biological_Process	0.137931034482759
GO:0050821	protein stabilization	3/29	171/17913	0.00260245375623948	0.00585830856512242	0.00149132248329368	TP53/CREB1/CDKN1A	3	geneontology_Biological_Process	0.103448275862069
GO:0035722	interleukin-12-mediated signaling pathway	2/29	47/17913	0.00261490342842206	0.00585830856512242	0.00149132248329368	IL10/IFNG	2	geneontology_Biological_Process	0.0689655172413793
GO:0043124	negative regulation of I-kappaB kinase/NF-kappaB signaling	2/29	47/17913	0.00261490342842206	0.00585830856512242	0.00149132248329368	STAT1/ESR1	2	geneontology_Biological_Process	0.0689655172413793
GO:0043370	regulation of CD4-positive, alpha-beta T cell differentiation	2/29	47/17913	0.00261490342842206	0.00585830856512242	0.00149132248329368	IL2/IFNG	2	geneontology_Biological_Process	0.0689655172413793
GO:0045646	regulation of erythrocyte differentiation	2/29	47/17913	0.00261490342842206	0.00585830856512242	0.00149132248329368	MAPK14/STAT1	2	geneontology_Biological_Process	0.0689655172413793
GO:0045912	negative regulation of carbohydrate metabolic process	2/29	47/17913	0.00261490342842206	0.00585830856512242	0.00149132248329368	TP53/TGFB1	2	geneontology_Biological_Process	0.0689655172413793
GO:0048641	regulation of skeletal muscle tissue development	2/29	47/17913	0.00261490342842206	0.00585830856512242	0.00149132248329368	BCL2/TGFB1	2	geneontology_Biological_Process	0.0689655172413793
GO:1900744	regulation of p38MAPK cascade	2/29	47/17913	0.00261490342842206	0.00585830856512242	0.00149132248329368	IL1B/VEGFA	2	geneontology_Biological_Process	0.0689655172413793
GO:0010256	endomembrane system organization	4/29	365/17913	0.00269185956702366	0.00602103741034908	0.0015327476118729	MAPK3/MAPK1/AKT1/CREB1	4	geneontology_Biological_Process	0.137931034482759
GO:0010959	regulation of metal ion transport	4/29	365/17913	0.00269185956702366	0.00602103741034908	0.0015327476118729	AKT1/BCL2/TGFB1/CCL2	4	geneontology_Biological_Process	0.137931034482759
GO:0002686	negative regulation of leukocyte migration	2/29	48/17913	0.00272586320775775	0.00606303332802942	0.00154343831816585	AKT1/CCL2	2	geneontology_Biological_Process	0.0689655172413793
GO:0031103	axon regeneration	2/29	48/17913	0.00272586320775775	0.00606303332802942	0.00154343831816585	JUN/BCL2	2	geneontology_Biological_Process	0.0689655172413793
GO:0044003	modification by symbiont of host morphology or physiology	2/29	48/17913	0.00272586320775775	0.00606303332802942	0.00154343831816585	TGFB1/BCL2L1	2	geneontology_Biological_Process	0.0689655172413793
GO:0045840	positive regulation of mitotic nuclear division	2/29	48/17913	0.00272586320775775	0.00606303332802942	0.00154343831816585	IL1B/TGFB1	2	geneontology_Biological_Process	0.0689655172413793
GO:0048546	digestive tract morphogenesis	2/29	48/17913	0.00272586320775775	0.00606303332802942	0.00154343831816585	EGFR/BCL2	2	geneontology_Biological_Process	0.0689655172413793
GO:0101023	vascular endothelial cell proliferation	2/29	48/17913	0.00272586320775775	0.00606303332802942	0.00154343831816585	SP1/CCL2	2	geneontology_Biological_Process	0.0689655172413793
GO:1905562	regulation of vascular endothelial cell proliferation	2/29	48/17913	0.00272586320775775	0.00606303332802942	0.00154343831816585	SP1/CCL2	2	geneontology_Biological_Process	0.0689655172413793
GO:0051168	nuclear export	3/29	176/17913	0.00282356642781778	0.00627464554092625	0.00159730745928816	TP53/IL1B/TGFB1	3	geneontology_Biological_Process	0.103448275862069
GO:0002534	cytokine production involved in inflammatory response	2/29	49/17913	0.00283901256803301	0.00627464554092625	0.00159730745928816	MAPK14/NOS2	2	geneontology_Biological_Process	0.0689655172413793
GO:0007595	lactation	2/29	49/17913	0.00283901256803301	0.00627464554092625	0.00159730745928816	CREB1/VEGFA	2	geneontology_Biological_Process	0.0689655172413793
GO:0010712	regulation of collagen metabolic process	2/29	49/17913	0.00283901256803301	0.00627464554092625	0.00159730745928816	IL6/TGFB1	2	geneontology_Biological_Process	0.0689655172413793
GO:0048260	positive regulation of receptor-mediated endocytosis	2/29	49/17913	0.00283901256803301	0.00627464554092625	0.00159730745928816	IL4/VEGFA	2	geneontology_Biological_Process	0.0689655172413793
GO:0055023	positive regulation of cardiac muscle tissue growth	2/29	49/17913	0.00283901256803301	0.00627464554092625	0.00159730745928816	MAPK1/MAPK14	2	geneontology_Biological_Process	0.0689655172413793
GO:0071349	cellular response to interleukin-12	2/29	49/17913	0.00283901256803301	0.00627464554092625	0.00159730745928816	IL10/IFNG	2	geneontology_Biological_Process	0.0689655172413793
GO:0097300	programmed necrotic cell death	2/29	49/17913	0.00283901256803301	0.00627464554092625	0.00159730745928816	TP53/TNF	2	geneontology_Biological_Process	0.0689655172413793
GO:0042391	regulation of membrane potential	4/29	374/17913	0.00293885639834149	0.0064901686071139	0.00165217216822268	JUN/AKT1/BCL2/BCL2L1	4	geneontology_Biological_Process	0.137931034482759
GO:0002931	response to ischemia	2/29	50/17913	0.00295434462764809	0.00650375867081771	0.00165563172780811	TP53/BCL2	2	geneontology_Biological_Process	0.0689655172413793
GO:0031343	positive regulation of cell killing	2/29	50/17913	0.00295434462764809	0.00650375867081771	0.00165563172780811	IFNG/NOS2	2	geneontology_Biological_Process	0.0689655172413793
GO:0070671	response to interleukin-12	2/29	50/17913	0.00295434462764809	0.00650375867081771	0.00165563172780811	IL10/IFNG	2	geneontology_Biological_Process	0.0689655172413793
GO:0070741	response to interleukin-6	2/29	50/17913	0.00295434462764809	0.00650375867081771	0.00165563172780811	IL6/STAT1	2	geneontology_Biological_Process	0.0689655172413793
GO:0006874	cellular calcium ion homeostasis	4/29	375/17913	0.00296722916148128	0.00652696738204287	0.00166153986195188	ESR1/IL2/BCL2/TGFB1	4	geneontology_Biological_Process	0.137931034482759
GO:0010952	positive regulation of peptidase activity	3/29	180/17913	0.00300857799241084	0.00661270257480205	0.00168336507295775	MAPK3/MAPK14/TNF	3	geneontology_Biological_Process	0.103448275862069
GO:0002040	sprouting angiogenesis	3/29	181/17913	0.00305597156674457	0.00671157821632555	0.00170853538715594	AKT1/IL10/VEGFA	3	geneontology_Biological_Process	0.103448275862069
GO:0032206	positive regulation of telomere maintenance	2/29	51/17913	0.00307185252021901	0.0067358402626675	0.0017147116639427	MAPK3/MAPK1	2	geneontology_Biological_Process	0.0689655172413793
GO:2000677	regulation of transcription regulatory region DNA binding	2/29	51/17913	0.00307185252021901	0.0067358402626675	0.0017147116639427	TGFB1/IFNG	2	geneontology_Biological_Process	0.0689655172413793
GO:0051216	cartilage development	3/29	182/17913	0.0031038244097298	0.00680059640716741	0.0017311963357811	MAPK3/MAPK14/TGFB1	3	geneontology_Biological_Process	0.103448275862069
GO:0048747	muscle fiber development	2/29	52/17913	0.00319152939454902	0.00698178369121515	0.00177732034365532	BCL2/VEGFA	2	geneontology_Biological_Process	0.0689655172413793
GO:0097345	mitochondrial outer membrane permeabilization	2/29	52/17913	0.00319152939454902	0.00698178369121515	0.00177732034365532	TP53/BCL2	2	geneontology_Biological_Process	0.0689655172413793
GO:0051147	regulation of muscle cell differentiation	3/29	185/17913	0.00325015330711524	0.00710445275837661	0.00180854764003771	MAPK14/BCL2/TGFB1	3	geneontology_Biological_Process	0.103448275862069
GO:0016233	telomere capping	2/29	53/17913	0.0033133684146	0.00720871020412974	0.00183508797521706	MAPK3/MAPK1	2	geneontology_Biological_Process	0.0689655172413793
GO:0019229	regulation of vasoconstriction	2/29	53/17913	0.0033133684146	0.00720871020412974	0.00183508797521706	AKT1/EGFR	2	geneontology_Biological_Process	0.0689655172413793
GO:0032210	regulation of telomere maintenance via telomerase	2/29	53/17913	0.0033133684146	0.00720871020412974	0.00183508797521706	MAPK3/MAPK1	2	geneontology_Biological_Process	0.0689655172413793
GO:0032964	collagen biosynthetic process	2/29	53/17913	0.0033133684146	0.00720871020412974	0.00183508797521706	IL6/TGFB1	2	geneontology_Biological_Process	0.0689655172413793
GO:0050853	B cell receptor signaling pathway	2/29	53/17913	0.0033133684146	0.00720871020412974	0.00183508797521706	MAPK1/BCL2	2	geneontology_Biological_Process	0.0689655172413793
GO:0060421	positive regulation of heart growth	2/29	53/17913	0.0033133684146	0.00720871020412974	0.00183508797521706	MAPK1/MAPK14	2	geneontology_Biological_Process	0.0689655172413793
GO:0055074	calcium ion homeostasis	4/29	388/17913	0.0033534144999214	0.00729014525060916	0.00185581851789722	ESR1/IL2/BCL2/TGFB1	4	geneontology_Biological_Process	0.137931034482759
GO:0019722	calcium-mediated signaling	3/29	188/17913	0.00340066833758253	0.00738711041063329	0.001880502489667	TNF/EGFR/CXCL8	3	geneontology_Biological_Process	0.103448275862069
GO:0032715	negative regulation of interleukin-6 production	2/29	54/17913	0.00343736275946408	0.00745519845184934	0.00189783534702338	TNF/IL10	2	geneontology_Biological_Process	0.0689655172413793
GO:0071385	cellular response to glucocorticoid stimulus	2/29	54/17913	0.00343736275946408	0.00745519845184934	0.00189783534702338	EGFR/TGFB1	2	geneontology_Biological_Process	0.0689655172413793
GO:0051224	negative regulation of protein transport	3/29	189/17913	0.00345177697164276	0.00748063951786031	0.00190431176138759	TNF/IL10/IL1B	3	geneontology_Biological_Process	0.103448275862069
GO:0072503	cellular divalent inorganic cation homeostasis	4/29	392/17913	0.00347884618988969	0.00753344547880541	0.00191775433033628	ESR1/IL2/BCL2/TGFB1	4	geneontology_Biological_Process	0.137931034482759
GO:0001885	endothelial cell development	2/29	55/17913	0.00356350562333514	0.00769286612876456	0.00195833730696554	TNF/IL1B	2	geneontology_Biological_Process	0.0689655172413793
GO:0031102	neuron projection regeneration	2/29	55/17913	0.00356350562333514	0.00769286612876456	0.00195833730696554	JUN/BCL2	2	geneontology_Biological_Process	0.0689655172413793
GO:0035306	positive regulation of dephosphorylation	2/29	55/17913	0.00356350562333514	0.00769286612876456	0.00195833730696554	TGFB1/IFNG	2	geneontology_Biological_Process	0.0689655172413793
GO:0098586	cellular response to virus	2/29	55/17913	0.00356350562333514	0.00769286612876456	0.00195833730696554	MAPK14/BCL2L1	2	geneontology_Biological_Process	0.0689655172413793
GO:1904950	negative regulation of establishment of protein localization	3/29	193/17913	0.00366093390742811	0.0078970764705899	0.00201032218804509	TNF/IL10/IL1B	3	geneontology_Biological_Process	0.103448275862069
GO:0006977	DNA damage response, signal transduction by p53 class mediator resulting in cell cycle arrest	2/29	56/17913	0.00369179021548044	0.00793293703203084	0.00201945104511124	TP53/CDKN1A	2	geneontology_Biological_Process	0.0689655172413793
GO:0071398	cellular response to fatty acid	2/29	56/17913	0.00369179021548044	0.00793293703203084	0.00201945104511124	AKT1/CREB1	2	geneontology_Biological_Process	0.0689655172413793
GO:1900449	regulation of glutamate receptor signaling pathway	2/29	56/17913	0.00369179021548044	0.00793293703203084	0.00201945104511124	IFNG/CCL2	2	geneontology_Biological_Process	0.0689655172413793
GO:1902808	positive regulation of cell cycle G1/S phase transition	2/29	56/17913	0.00369179021548044	0.00793293703203084	0.00201945104511124	AKT1/EGFR	2	geneontology_Biological_Process	0.0689655172413793
GO:1903202	negative regulation of oxidative stress-induced cell death	2/29	56/17913	0.00369179021548044	0.00793293703203084	0.00201945104511124	AKT1/IL10	2	geneontology_Biological_Process	0.0689655172413793
GO:0006473	protein acetylation	3/29	195/17913	0.00376836522906734	0.00809124336934566	0.0020597503563307	MAPK3/IL1B/TGFB1	3	geneontology_Biological_Process	0.103448275862069
GO:0010518	positive regulation of phospholipase activity	2/29	57/17913	0.00382220976021233	0.00815784112431893	0.00207670383841934	ESR1/EGFR	2	geneontology_Biological_Process	0.0689655172413793
GO:0032890	regulation of organic acid transport	2/29	57/17913	0.00382220976021233	0.00815784112431893	0.00207670383841934	AKT1/IL1B	2	geneontology_Biological_Process	0.0689655172413793
GO:0045453	bone resorption	2/29	57/17913	0.00382220976021233	0.00815784112431893	0.00207670383841934	IL6/EGFR	2	geneontology_Biological_Process	0.0689655172413793
GO:0072431	signal transduction involved in mitotic G1 DNA damage checkpoint	2/29	57/17913	0.00382220976021233	0.00815784112431893	0.00207670383841934	TP53/CDKN1A	2	geneontology_Biological_Process	0.0689655172413793
GO:1900408	negative regulation of cellular response to oxidative stress	2/29	57/17913	0.00382220976021233	0.00815784112431893	0.00207670383841934	AKT1/IL10	2	geneontology_Biological_Process	0.0689655172413793
GO:1902400	intracellular signal transduction involved in G1 DNA damage checkpoint	2/29	57/17913	0.00382220976021233	0.00815784112431893	0.00207670383841934	TP53/CDKN1A	2	geneontology_Biological_Process	0.0689655172413793
GO:1903749	positive regulation of establishment of protein localization to mitochondrion	2/29	57/17913	0.00382220976021233	0.00815784112431893	0.00207670383841934	TP53/BCL2	2	geneontology_Biological_Process	0.0689655172413793
GO:0043281	regulation of cysteine-type endopeptidase activity involved in apoptotic process	3/29	196/17913	0.00382279889069269	0.00815784112431893	0.00207670383841934	AKT1/TNF/VEGFA	3	geneontology_Biological_Process	0.103448275862069
GO:0044282	small molecule catabolic process	4/29	404/17913	0.00387436412419736	0.00826155532833821	0.0021031058830661	TP53/AKT1/TGFB1/NOS2	4	geneontology_Biological_Process	0.137931034482759
GO:0006109	regulation of carbohydrate metabolic process	3/29	198/17913	0.00393310894903608	0.00838040874691403	0.0021333618474572	TP53/AKT1/TGFB1	3	geneontology_Biological_Process	0.103448275862069
GO:0042093	T-helper cell differentiation	2/29	58/17913	0.00395475749685988	0.00840084538395463	0.00213856430751248	IL6/IL2	2	geneontology_Biological_Process	0.0689655172413793
GO:0060043	regulation of cardiac muscle cell proliferation	2/29	58/17913	0.00395475749685988	0.00840084538395463	0.00213856430751248	MAPK1/MAPK14	2	geneontology_Biological_Process	0.0689655172413793
GO:0071384	cellular response to corticosteroid stimulus	2/29	58/17913	0.00395475749685988	0.00840084538395463	0.00213856430751248	EGFR/TGFB1	2	geneontology_Biological_Process	0.0689655172413793
GO:1902110	positive regulation of mitochondrial membrane permeability involved in apoptotic process	2/29	58/17913	0.00395475749685988	0.00840084538395463	0.00213856430751248	TP53/BCL2	2	geneontology_Biological_Process	0.0689655172413793
GO:0010830	regulation of myotube differentiation	2/29	59/17913	0.00408942667974073	0.00863426678517987	0.00219798531271551	MAPK14/BCL2	2	geneontology_Biological_Process	0.0689655172413793
GO:0034394	protein localization to cell surface	2/29	59/17913	0.00408942667974073	0.00863426678517987	0.00219798531271551	AKT1/TNF	2	geneontology_Biological_Process	0.0689655172413793
GO:0045123	cellular extravasation	2/29	59/17913	0.00408942667974073	0.00863426678517987	0.00219798531271551	TNF/CCL2	2	geneontology_Biological_Process	0.0689655172413793
GO:0072413	signal transduction involved in mitotic cell cycle checkpoint	2/29	59/17913	0.00408942667974073	0.00863426678517987	0.00219798531271551	TP53/CDKN1A	2	geneontology_Biological_Process	0.0689655172413793
GO:1902402	signal transduction involved in mitotic DNA damage checkpoint	2/29	59/17913	0.00408942667974073	0.00863426678517987	0.00219798531271551	TP53/CDKN1A	2	geneontology_Biological_Process	0.0689655172413793
GO:1902403	signal transduction involved in mitotic DNA integrity checkpoint	2/29	59/17913	0.00408942667974073	0.00863426678517987	0.00219798531271551	TP53/CDKN1A	2	geneontology_Biological_Process	0.0689655172413793
GO:1902883	negative regulation of response to oxidative stress	2/29	59/17913	0.00408942667974073	0.00863426678517987	0.00219798531271551	AKT1/IL10	2	geneontology_Biological_Process	0.0689655172413793
GO:2000514	regulation of CD4-positive, alpha-beta T cell activation	2/29	59/17913	0.00408942667974073	0.00863426678517987	0.00219798531271551	IL2/IFNG	2	geneontology_Biological_Process	0.0689655172413793
GO:1903531	negative regulation of secretion by cell	3/29	202/17913	0.00415953712699679	0.00877564721645728	0.00223397587441399	TNF/IL10/IL1B	3	geneontology_Biological_Process	0.103448275862069
GO:0031640	killing of cells of other organism	2/29	60/17913	0.00422621057813287	0.00888269146399419	0.00226122563281857	IFNG/NOS2	2	geneontology_Biological_Process	0.0689655172413793
GO:0044364	disruption of cells of other organism	2/29	60/17913	0.00422621057813287	0.00888269146399419	0.00226122563281857	IFNG/NOS2	2	geneontology_Biological_Process	0.0689655172413793
GO:0051785	positive regulation of nuclear division	2/29	60/17913	0.00422621057813287	0.00888269146399419	0.00226122563281857	IL1B/TGFB1	2	geneontology_Biological_Process	0.0689655172413793
GO:1902686	mitochondrial outer membrane permeabilization involved in programmed cell death	2/29	60/17913	0.00422621057813287	0.00888269146399419	0.00226122563281857	TP53/BCL2	2	geneontology_Biological_Process	0.0689655172413793
GO:2000401	regulation of lymphocyte migration	2/29	60/17913	0.00422621057813287	0.00888269146399419	0.00226122563281857	AKT1/CCL2	2	geneontology_Biological_Process	0.0689655172413793
GO:0002709	regulation of T cell mediated immunity	2/29	61/17913	0.00436510247624646	0.00914015071472494	0.0023267658420579	IL6/IL1B	2	geneontology_Biological_Process	0.0689655172413793
GO:0014032	neural crest cell development	2/29	61/17913	0.00436510247624646	0.00914015071472494	0.0023267658420579	MAPK3/MAPK1	2	geneontology_Biological_Process	0.0689655172413793
GO:0043388	positive regulation of DNA binding	2/29	61/17913	0.00436510247624646	0.00914015071472494	0.0023267658420579	TGFB1/IFNG	2	geneontology_Biological_Process	0.0689655172413793
GO:0048645	animal organ formation	2/29	61/17913	0.00436510247624646	0.00914015071472494	0.0023267658420579	MAPK3/MAPK1	2	geneontology_Biological_Process	0.0689655172413793
GO:1904356	regulation of telomere maintenance via telomere lengthening	2/29	61/17913	0.00436510247624646	0.00914015071472494	0.0023267658420579	MAPK3/MAPK1	2	geneontology_Biological_Process	0.0689655172413793
GO:0035303	regulation of dephosphorylation	3/29	206/17913	0.00439377873878213	0.00919328929803739	0.00234029308514237	TNF/TGFB1/IFNG	3	geneontology_Biological_Process	0.103448275862069
GO:0051346	negative regulation of hydrolase activity	4/29	420/17913	0.00444802591567908	0.00929981112302895	0.00236740985285877	TP53/AKT1/TNF/VEGFA	4	geneontology_Biological_Process	0.137931034482759
GO:0035794	positive regulation of mitochondrial membrane permeability	2/29	62/17913	0.00450609567319578	0.00940710759640197	0.00239472381922646	TP53/BCL2	2	geneontology_Biological_Process	0.0689655172413793
GO:0070265	necrotic cell death	2/29	62/17913	0.00450609567319578	0.00940710759640197	0.00239472381922646	TP53/TNF	2	geneontology_Biological_Process	0.0689655172413793
GO:0007411	axon guidance	3/29	210/17913	0.00463591495816956	0.00965519699481421	0.00245787878855014	MAPK3/MAPK1/VEGFA	3	geneontology_Biological_Process	0.103448275862069
GO:0065004	protein-DNA complex assembly	3/29	210/17913	0.00463591495816956	0.00965519699481421	0.00245787878855014	TP53/ESR1/CREB1	3	geneontology_Biological_Process	0.103448275862069
GO:0019748	secondary metabolic process	2/29	63/17913	0.00464918348297118	0.00965519699481421	0.00245787878855014	SP1/BCL2	2	geneontology_Biological_Process	0.0689655172413793
GO:0031571	mitotic G1 DNA damage checkpoint	2/29	63/17913	0.00464918348297118	0.00965519699481421	0.00245787878855014	TP53/CDKN1A	2	geneontology_Biological_Process	0.0689655172413793
GO:0044819	mitotic G1/S transition checkpoint	2/29	63/17913	0.00464918348297118	0.00965519699481421	0.00245787878855014	TP53/CDKN1A	2	geneontology_Biological_Process	0.0689655172413793
GO:0046637	regulation of alpha-beta T cell differentiation	2/29	63/17913	0.00464918348297118	0.00965519699481421	0.00245787878855014	IL2/IFNG	2	geneontology_Biological_Process	0.0689655172413793
GO:0071277	cellular response to calcium ion	2/29	63/17913	0.00464918348297118	0.00965519699481421	0.00245787878855014	JUN/FOS	2	geneontology_Biological_Process	0.0689655172413793
GO:0097485	neuron projection guidance	3/29	212/17913	0.00475996827879918	0.0098779088555572	0.00251457351562539	MAPK3/MAPK1/VEGFA	3	geneontology_Biological_Process	0.103448275862069
GO:0044783	G1 DNA damage checkpoint	2/29	64/17913	0.00479435923441103	0.00991973213534041	0.00252522027428831	TP53/CDKN1A	2	geneontology_Biological_Process	0.0689655172413793
GO:0046782	regulation of viral transcription	2/29	64/17913	0.00479435923441103	0.00991973213534041	0.00252522027428831	JUN/SP1	2	geneontology_Biological_Process	0.0689655172413793
GO:1902108	regulation of mitochondrial membrane permeability involved in apoptotic process	2/29	64/17913	0.00479435923441103	0.00991973213534041	0.00252522027428831	TP53/BCL2	2	geneontology_Biological_Process	0.0689655172413793
GO:1905710	positive regulation of membrane permeability	2/29	64/17913	0.00479435923441103	0.00991973213534041	0.00252522027428831	TP53/BCL2	2	geneontology_Biological_Process	0.0689655172413793
GO:0034329	cell junction assembly	3/29	214/17913	0.00488602464429069	0.0100944037684493	0.00256968562307512	TNF/BCL2/VEGFA	3	geneontology_Biological_Process	0.103448275862069
GO:0060560	developmental growth involved in morphogenesis	3/29	214/17913	0.00488602464429069	0.0100944037684493	0.00256968562307512	ESR1/TGFB1/VEGFA	3	geneontology_Biological_Process	0.103448275862069
GO:0014823	response to activity	2/29	65/17913	0.00494161627117384	0.0101941410420144	0.00259507527895218	CREB1/IL10	2	geneontology_Biological_Process	0.0689655172413793
GO:0048864	stem cell development	2/29	65/17913	0.00494161627117384	0.0101941410420144	0.00259507527895218	MAPK3/MAPK1	2	geneontology_Biological_Process	0.0689655172413793
GO:0000271	polysaccharide biosynthetic process	2/29	66/17913	0.00509094795171033	0.0104480647580388	0.00265971546349334	AKT1/TGFB1	2	geneontology_Biological_Process	0.0689655172413793
GO:0010517	regulation of phospholipase activity	2/29	66/17913	0.00509094795171033	0.0104480647580388	0.00265971546349334	ESR1/EGFR	2	geneontology_Biological_Process	0.0689655172413793
GO:0016239	positive regulation of macroautophagy	2/29	66/17913	0.00509094795171033	0.0104480647580388	0.00265971546349334	MAPK3/IL4	2	geneontology_Biological_Process	0.0689655172413793
GO:0051926	negative regulation of calcium ion transport	2/29	66/17913	0.00509094795171033	0.0104480647580388	0.00265971546349334	BCL2/TGFB1	2	geneontology_Biological_Process	0.0689655172413793
GO:1903672	positive regulation of sprouting angiogenesis	2/29	66/17913	0.00509094795171033	0.0104480647580388	0.00265971546349334	IL10/VEGFA	2	geneontology_Biological_Process	0.0689655172413793
GO:1905207	regulation of cardiocyte differentiation	2/29	66/17913	0.00509094795171033	0.0104480647580388	0.00265971546349334	EGFR/TGFB1	2	geneontology_Biological_Process	0.0689655172413793
GO:2000573	positive regulation of DNA biosynthetic process	2/29	66/17913	0.00509094795171033	0.0104480647580388	0.00265971546349334	MAPK3/MAPK1	2	geneontology_Biological_Process	0.0689655172413793
GO:0050807	regulation of synapse organization	3/29	218/17913	0.00514418437115957	0.0105495524962632	0.00268555072705282	MAPK14/TNF/IL10	3	geneontology_Biological_Process	0.103448275862069
GO:0007004	telomere maintenance via telomerase	2/29	67/17913	0.0052423476492355	0.0107193124713275	0.00272876573779567	MAPK3/MAPK1	2	geneontology_Biological_Process	0.0689655172413793
GO:0040014	regulation of multicellular organism growth	2/29	67/17913	0.0052423476492355	0.0107193124713275	0.00272876573779567	CREB1/BCL2	2	geneontology_Biological_Process	0.0689655172413793
GO:0050918	positive chemotaxis	2/29	67/17913	0.0052423476492355	0.0107193124713275	0.00272876573779567	CXCL8/VEGFA	2	geneontology_Biological_Process	0.0689655172413793
GO:0099601	regulation of neurotransmitter receptor activity	2/29	67/17913	0.0052423476492355	0.0107193124713275	0.00272876573779567	IFNG/CCL2	2	geneontology_Biological_Process	0.0689655172413793
GO:0002526	acute inflammatory response	3/29	220/17913	0.00527630631162001	0.0107808399490359	0.00274442850287998	IL6/TNF/IL1B	3	geneontology_Biological_Process	0.103448275862069
GO:0090066	regulation of anatomical structure size	4/29	442/17913	0.0053273652200905	0.010877191844976	0.00276895635885174	AKT1/CREB1/EGFR/VEGFA	4	geneontology_Biological_Process	0.137931034482759
GO:0060038	cardiac muscle cell proliferation	2/29	68/17913	0.00539580875170092	0.0110008185742432	0.00280042744284173	MAPK1/MAPK14	2	geneontology_Biological_Process	0.0689655172413793
GO:1903524	positive regulation of blood circulation	2/29	68/17913	0.00539580875170092	0.0110008185742432	0.00280042744284173	AKT1/EGFR	2	geneontology_Biological_Process	0.0689655172413793
GO:0001649	osteoblast differentiation	3/29	222/17913	0.00541046845691875	0.0110065515251333	0.00280188685360218	IL6/AKT1/TNF	3	geneontology_Biological_Process	0.103448275862069
GO:0050803	regulation of synapse structure or activity	3/29	222/17913	0.00541046845691875	0.0110065515251333	0.00280188685360218	MAPK14/TNF/IL10	3	geneontology_Biological_Process	0.103448275862069
GO:2000116	regulation of cysteine-type endopeptidase activity	3/29	222/17913	0.00541046845691875	0.0110065515251333	0.00280188685360218	AKT1/TNF/VEGFA	3	geneontology_Biological_Process	0.103448275862069
GO:0006839	mitochondrial transport	3/29	224/17913	0.005546679749096	0.0112602196741954	0.00286646197964522	TP53/BCL2/BCL2L1	3	geneontology_Biological_Process	0.103448275862069
GO:0009743	response to carbohydrate	3/29	224/17913	0.005546679749096	0.0112602196741954	0.00286646197964522	CASP3/IL1B/TGFB1	3	geneontology_Biological_Process	0.103448275862069
GO:0033077	T cell differentiation in thymus	2/29	69/17913	0.00555132466176693	0.0112602196741954	0.00286646197964522	TP53/BCL2	2	geneontology_Biological_Process	0.0689655172413793
GO:2001259	positive regulation of cation channel activity	2/29	69/17913	0.00555132466176693	0.0112602196741954	0.00286646197964522	IFNG/CCL2	2	geneontology_Biological_Process	0.0689655172413793
GO:0051048	negative regulation of secretion	3/29	226/17913	0.00568494899280549	0.0115228747948719	0.0029333248774361	TNF/IL10/IL1B	3	geneontology_Biological_Process	0.103448275862069
GO:0014033	neural crest cell differentiation	2/29	70/17913	0.00570888879677489	0.0115545919220128	0.00294139895961952	MAPK3/MAPK1	2	geneontology_Biological_Process	0.0689655172413793
GO:0060193	positive regulation of lipase activity	2/29	70/17913	0.00570888879677489	0.0115545919220128	0.00294139895961952	ESR1/EGFR	2	geneontology_Biological_Process	0.0689655172413793
GO:0034765	regulation of ion transmembrane transport	4/29	453/17913	0.00580807537078352	0.0117468113631159	0.00299033137262859	AKT1/TGFB1/IFNG/CCL2	4	geneontology_Biological_Process	0.137931034482759
GO:0042310	vasoconstriction	2/29	71/17913	0.00586849458871954	0.0118518075498271	0.00301705976567275	AKT1/EGFR	2	geneontology_Biological_Process	0.0689655172413793
GO:1903747	regulation of establishment of protein localization to mitochondrion	2/29	71/17913	0.00586849458871954	0.0118518075498271	0.00301705976567275	TP53/BCL2	2	geneontology_Biological_Process	0.0689655172413793
GO:0002028	regulation of sodium ion transport	2/29	72/17913	0.00603013548422139	0.0121430546203215	0.00309120118372773	AKT1/TGFB1	2	geneontology_Biological_Process	0.0689655172413793
GO:0002532	production of molecular mediator involved in inflammatory response	2/29	72/17913	0.00603013548422139	0.0121430546203215	0.00309120118372773	MAPK14/NOS2	2	geneontology_Biological_Process	0.0689655172413793
GO:0050710	negative regulation of cytokine secretion	2/29	72/17913	0.00603013548422139	0.0121430546203215	0.00309120118372773	TNF/IL10	2	geneontology_Biological_Process	0.0689655172413793
GO:0050829	defense response to Gram-negative bacterium	2/29	72/17913	0.00603013548422139	0.0121430546203215	0.00309120118372773	IL6/NOS2	2	geneontology_Biological_Process	0.0689655172413793
GO:0016311	dephosphorylation	4/29	458/17913	0.00603591178653195	0.0121459105769419	0.00309192821137947	TNF/BCL2/TGFB1/IFNG	4	geneontology_Biological_Process	0.137931034482759
GO:0043543	protein acylation	3/29	233/17913	0.00618522163933978	0.0124188017124597	0.00316139684406845	MAPK3/IL1B/TGFB1	3	geneontology_Biological_Process	0.103448275862069
GO:0043627	response to estrogen	2/29	73/17913	0.00619380494449909	0.0124188017124597	0.00316139684406845	MAPK1/ESR1	2	geneontology_Biological_Process	0.0689655172413793
GO:0050688	regulation of defense response to virus	2/29	73/17913	0.00619380494449909	0.0124188017124597	0.00316139684406845	STAT1/IL1B	2	geneontology_Biological_Process	0.0689655172413793
GO:0072401	signal transduction involved in DNA integrity checkpoint	2/29	73/17913	0.00619380494449909	0.0124188017124597	0.00316139684406845	TP53/CDKN1A	2	geneontology_Biological_Process	0.0689655172413793
GO:0072422	signal transduction involved in DNA damage checkpoint	2/29	73/17913	0.00619380494449909	0.0124188017124597	0.00316139684406845	TP53/CDKN1A	2	geneontology_Biological_Process	0.0689655172413793
GO:0006278	RNA-dependent DNA biosynthetic process	2/29	74/17913	0.00635949644534197	0.0127235582147653	0.00323897729562133	MAPK3/MAPK1	2	geneontology_Biological_Process	0.0689655172413793
GO:0060291	long-term synaptic potentiation	2/29	74/17913	0.00635949644534197	0.0127235582147653	0.00323897729562133	MAPK1/CREB1	2	geneontology_Biological_Process	0.0689655172413793
GO:0072395	signal transduction involved in cell cycle checkpoint	2/29	74/17913	0.00635949644534197	0.0127235582147653	0.00323897729562133	TP53/CDKN1A	2	geneontology_Biological_Process	0.0689655172413793
GO:0007264	small GTPase mediated signal transduction	4/29	465/17913	0.00636485966611594	0.0127251534357712	0.00323938338364581	JUN/TP53/MAPK14/CDKN1A	4	geneontology_Biological_Process	0.137931034482759
GO:0006875	cellular metal ion homeostasis	4/29	467/17913	0.00646100566938329	0.0129081167029184	0.00328595949531359	ESR1/IL2/BCL2/TGFB1	4	geneontology_Biological_Process	0.137931034482759
GO:0031348	negative regulation of defense response	3/29	237/17913	0.00648259628848044	0.0129419741088789	0.00329457841836512	IL10/IL2/IL4	3	geneontology_Biological_Process	0.103448275862069
GO:0031016	pancreas development	2/29	75/17913	0.00652720347708248	0.0130030851255389	0.00331013516688883	IL6/AKT1	2	geneontology_Biological_Process	0.0689655172413793
GO:0048678	response to axon injury	2/29	75/17913	0.00652720347708248	0.0130030851255389	0.00331013516688883	JUN/BCL2	2	geneontology_Biological_Process	0.0689655172413793
GO:0051145	smooth muscle cell differentiation	2/29	75/17913	0.00652720347708248	0.0130030851255389	0.00331013516688883	TGFB1/VEGFA	2	geneontology_Biological_Process	0.0689655172413793
GO:0007281	germ cell development	3/29	238/17913	0.00655825741055981	0.013055616716593	0.0033235078907649	AKT1/BCL2/BCL2L1	3	geneontology_Biological_Process	0.103448275862069
GO:0071824	protein-DNA complex subunit organization	3/29	240/17913	0.00671116749067749	0.0133504809396989	0.00339857011061019	TP53/ESR1/CREB1	3	geneontology_Biological_Process	0.103448275862069
GO:0097237	cellular response to toxic substance	3/29	241/17913	0.00678841838301404	0.0134945235616691	0.0034352383738655	IL6/TNF/IL10	3	geneontology_Biological_Process	0.103448275862069
GO:0022898	regulation of transmembrane transporter activity	3/29	242/17913	0.00686620111955759	0.0135958058038439	0.0034610213252472	BCL2/IFNG/CCL2	3	geneontology_Biological_Process	0.103448275862069
GO:0008306	associative learning	2/29	77/17913	0.00686863816713748	0.0135958058038439	0.0034610213252472	FOS/CREB1	2	geneontology_Biological_Process	0.0689655172413793
GO:0034644	cellular response to UV	2/29	77/17913	0.00686863816713748	0.0135958058038439	0.0034610213252472	TP53/CDKN1A	2	geneontology_Biological_Process	0.0689655172413793
GO:0045685	regulation of glial cell differentiation	2/29	77/17913	0.00686863816713748	0.0135958058038439	0.0034610213252472	IL6/TGFB1	2	geneontology_Biological_Process	0.0689655172413793
GO:0051851	modification by host of symbiont morphology or physiology	2/29	77/17913	0.00686863816713748	0.0135958058038439	0.0034610213252472	JUN/SP1	2	geneontology_Biological_Process	0.0689655172413793
GO:0061418	regulation of transcription from RNA polymerase II promoter in response to hypoxia	2/29	77/17913	0.00686863816713748	0.0135958058038439	0.0034610213252472	TP53/VEGFA	2	geneontology_Biological_Process	0.0689655172413793
GO:0061448	connective tissue development	3/29	243/17913	0.00694451664723175	0.0137265020537836	0.0034942920643779	MAPK3/MAPK14/TGFB1	3	geneontology_Biological_Process	0.103448275862069
GO:0071383	cellular response to steroid hormone stimulus	3/29	243/17913	0.00694451664723175	0.0137265020537836	0.0034942920643779	ESR1/EGFR/TGFB1	3	geneontology_Biological_Process	0.103448275862069
GO:0051924	regulation of calcium ion transport	3/29	244/17913	0.00702336590491791	0.0138725164968152	0.00353146228498987	BCL2/TGFB1/CCL2	3	geneontology_Biological_Process	0.103448275862069
GO:0001570	vasculogenesis	2/29	78/17913	0.00704235287858598	0.0138805074063784	0.0035334964938338	TGFB1/VEGFA	2	geneontology_Biological_Process	0.0689655172413793
GO:0022617	extracellular matrix disassembly	2/29	78/17913	0.00704235287858598	0.0138805074063784	0.0035334964938338	IL6/TGFB1	2	geneontology_Biological_Process	0.0689655172413793
GO:0030512	negative regulation of transforming growth factor beta receptor signaling pathway	2/29	78/17913	0.00704235287858598	0.0138805074063784	0.0035334964938338	TP53/TGFB1	2	geneontology_Biological_Process	0.0689655172413793
GO:0001501	skeletal system development	4/29	479/17913	0.0070583674678683	0.0139022403766424	0.0035390289554348	TP53/MAPK3/MAPK14/TGFB1	4	geneontology_Biological_Process	0.137931034482759
GO:0010833	telomere maintenance via telomere lengthening	2/29	79/17913	0.0072180572271455	0.0141467830464518	0.00360128105048195	MAPK3/MAPK1	2	geneontology_Biological_Process	0.0689655172413793
GO:0032204	regulation of telomere maintenance	2/29	79/17913	0.0072180572271455	0.0141467830464518	0.00360128105048195	MAPK3/MAPK1	2	geneontology_Biological_Process	0.0689655172413793
GO:0043154	negative regulation of cysteine-type endopeptidase activity involved in apoptotic process	2/29	79/17913	0.0072180572271455	0.0141467830464518	0.00360128105048195	AKT1/VEGFA	2	geneontology_Biological_Process	0.0689655172413793
GO:0055021	regulation of cardiac muscle tissue growth	2/29	79/17913	0.0072180572271455	0.0141467830464518	0.00360128105048195	MAPK1/MAPK14	2	geneontology_Biological_Process	0.0689655172413793
GO:0097756	negative regulation of blood vessel diameter	2/29	79/17913	0.0072180572271455	0.0141467830464518	0.00360128105048195	AKT1/EGFR	2	geneontology_Biological_Process	0.0689655172413793
GO:1900034	regulation of cellular response to heat	2/29	79/17913	0.0072180572271455	0.0141467830464518	0.00360128105048195	MAPK3/MAPK1	2	geneontology_Biological_Process	0.0689655172413793
GO:2001021	negative regulation of response to DNA damage stimulus	2/29	79/17913	0.0072180572271455	0.0141467830464518	0.00360128105048195	BCL2/BCL2L1	2	geneontology_Biological_Process	0.0689655172413793
GO:0003151	outflow tract morphogenesis	2/29	80/17913	0.00739574477545364	0.0144645197818872	0.00368216581987498	JUN/VEGFA	2	geneontology_Biological_Process	0.0689655172413793
GO:0110110	positive regulation of animal organ morphogenesis	2/29	80/17913	0.00739574477545364	0.0144645197818872	0.00368216581987498	TGFB1/VEGFA	2	geneontology_Biological_Process	0.0689655172413793
GO:1903845	negative regulation of cellular response to transforming growth factor beta stimulus	2/29	80/17913	0.00739574477545364	0.0144645197818872	0.00368216581987498	TP53/TGFB1	2	geneontology_Biological_Process	0.0689655172413793
GO:0016054	organic acid catabolic process	3/29	250/17913	0.00750772135199098	0.0146629428227042	0.00373267745453614	AKT1/TGFB1/NOS2	3	geneontology_Biological_Process	0.103448275862069
GO:0046395	carboxylic acid catabolic process	3/29	250/17913	0.00750772135199098	0.0146629428227042	0.00373267745453614	AKT1/TGFB1/NOS2	3	geneontology_Biological_Process	0.103448275862069
GO:0007045	cell-substrate adherens junction assembly	2/29	81/17913	0.00757540910052726	0.0147537841811107	0.00375580251848569	BCL2/VEGFA	2	geneontology_Biological_Process	0.0689655172413793
GO:0048041	focal adhesion assembly	2/29	81/17913	0.00757540910052726	0.0147537841811107	0.00375580251848569	BCL2/VEGFA	2	geneontology_Biological_Process	0.0689655172413793
GO:0051702	interaction with symbiont	2/29	81/17913	0.00757540910052726	0.0147537841811107	0.00375580251848569	JUN/SP1	2	geneontology_Biological_Process	0.0689655172413793
GO:0051899	membrane depolarization	2/29	81/17913	0.00757540910052726	0.0147537841811107	0.00375580251848569	JUN/BCL2	2	geneontology_Biological_Process	0.0689655172413793
GO:0014855	striated muscle cell proliferation	2/29	82/17913	0.00775704379373526	0.0150969839756565	0.00384316930092441	MAPK1/MAPK14	2	geneontology_Biological_Process	0.0689655172413793
GO:0032409	regulation of transporter activity	3/29	257/17913	0.00809738840341848	0.0157483750735013	0.0040089909162993	BCL2/IFNG/CCL2	3	geneontology_Biological_Process	0.103448275862069
GO:0042058	regulation of epidermal growth factor receptor signaling pathway	2/29	84/17913	0.00812619872162768	0.0157823803743389	0.00401764748826485	AKT1/EGFR	2	geneontology_Biological_Process	0.0689655172413793
GO:0060420	regulation of heart growth	2/29	84/17913	0.00812619872162768	0.0157823803743389	0.00401764748826485	MAPK1/MAPK14	2	geneontology_Biological_Process	0.0689655172413793
GO:0045185	maintenance of protein location	2/29	85/17913	0.00831370621056645	0.0161240773895955	0.00410463171513884	AKT1/IL10	2	geneontology_Biological_Process	0.0689655172413793
GO:0070542	response to fatty acid	2/29	85/17913	0.00831370621056645	0.0161240773895955	0.00410463171513884	AKT1/CREB1	2	geneontology_Biological_Process	0.0689655172413793
GO:0006260	DNA replication	3/29	260/17913	0.00835827667377505	0.0161992469331092	0.00412376727774276	JUN/TP53/EGFR	3	geneontology_Biological_Process	0.103448275862069
GO:0044773	mitotic DNA damage checkpoint	2/29	86/17913	0.00850315857609427	0.0164571548274825	0.00418942169611662	TP53/CDKN1A	2	geneontology_Biological_Process	0.0689655172413793
GO:0050830	defense response to Gram-positive bacterium	2/29	86/17913	0.00850315857609427	0.0164571548274825	0.00418942169611662	IL6/TNF	2	geneontology_Biological_Process	0.0689655172413793
GO:0021700	developmental maturation	3/29	262/17913	0.00853494326103749	0.0165072080975097	0.00420216352528527	CDKN1A/BCL2/VEGFA	3	geneontology_Biological_Process	0.103448275862069
GO:0007215	glutamate receptor signaling pathway	2/29	87/17913	0.00869454948093457	0.0167809621906957	0.00427185183711175	IFNG/CCL2	2	geneontology_Biological_Process	0.0689655172413793
GO:0072676	lymphocyte migration	2/29	87/17913	0.00869454948093457	0.0167809621906957	0.00427185183711175	AKT1/CCL2	2	geneontology_Biological_Process	0.0689655172413793
GO:2000117	negative regulation of cysteine-type endopeptidase activity	2/29	87/17913	0.00869454948093457	0.0167809621906957	0.00427185183711175	AKT1/VEGFA	2	geneontology_Biological_Process	0.0689655172413793
GO:0015980	energy derivation by oxidation of organic compounds	3/29	264/17913	0.0087138101433038	0.0168064974874655	0.00427835223936388	TP53/AKT1/NOS2	3	geneontology_Biological_Process	0.103448275862069
GO:0009791	post-embryonic development	2/29	88/17913	0.00888787260200086	0.0171303602640224	0.00436079648667728	BCL2/VEGFA	2	geneontology_Biological_Process	0.0689655172413793
GO:0034333	adherens junction assembly	2/29	90/17913	0.0092802902712547	0.0178373579213702	0.00454077360640702	BCL2/VEGFA	2	geneontology_Biological_Process	0.0689655172413793
GO:0044774	mitotic DNA integrity checkpoint	2/29	90/17913	0.0092802902712547	0.0178373579213702	0.00454077360640702	TP53/CDKN1A	2	geneontology_Biological_Process	0.0689655172413793
GO:0046634	regulation of alpha-beta T cell activation	2/29	90/17913	0.0092802902712547	0.0178373579213702	0.00454077360640702	IL2/IFNG	2	geneontology_Biological_Process	0.0689655172413793
GO:1901888	regulation of cell junction assembly	2/29	90/17913	0.0092802902712547	0.0178373579213702	0.00454077360640702	TNF/VEGFA	2	geneontology_Biological_Process	0.0689655172413793
GO:0001656	metanephros development	2/29	91/17913	0.00947937224397825	0.0181949107740822	0.00463179418039824	STAT1/BCL2	2	geneontology_Biological_Process	0.0689655172413793
GO:1901184	regulation of ERBB signaling pathway	2/29	91/17913	0.00947937224397825	0.0181949107740822	0.00463179418039824	AKT1/EGFR	2	geneontology_Biological_Process	0.0689655172413793
GO:0019395	fatty acid oxidation	2/29	93/17913	0.00988325113262103	0.0189310109323813	0.0048191797890299	MAPK14/AKT1	2	geneontology_Biological_Process	0.0689655172413793
GO:0044070	regulation of anion transport	2/29	93/17913	0.00988325113262103	0.0189310109323813	0.0048191797890299	AKT1/IL1B	2	geneontology_Biological_Process	0.0689655172413793
GO:0051591	response to cAMP	2/29	93/17913	0.00988325113262103	0.0189310109323813	0.0048191797890299	STAT1/FOS	2	geneontology_Biological_Process	0.0689655172413793
GO:0007030	Golgi organization	2/29	94/17913	0.0100880355574942	0.0192702913630819	0.00490554883716397	MAPK3/MAPK1	2	geneontology_Biological_Process	0.0689655172413793
GO:0043255	regulation of carbohydrate biosynthetic process	2/29	94/17913	0.0100880355574942	0.0192702913630819	0.00490554883716397	AKT1/TGFB1	2	geneontology_Biological_Process	0.0689655172413793
GO:0045778	positive regulation of ossification	2/29	94/17913	0.0100880355574942	0.0192702913630819	0.00490554883716397	IL6/TGFB1	2	geneontology_Biological_Process	0.0689655172413793
GO:0060191	regulation of lipase activity	2/29	94/17913	0.0100880355574942	0.0192702913630819	0.00490554883716397	ESR1/EGFR	2	geneontology_Biological_Process	0.0689655172413793
GO:0007589	body fluid secretion	2/29	95/17913	0.0102947083320609	0.0196113138219096	0.00499236134533156	CREB1/VEGFA	2	geneontology_Biological_Process	0.0689655172413793
GO:0019217	regulation of fatty acid metabolic process	2/29	95/17913	0.0102947083320609	0.0196113138219096	0.00499236134533156	AKT1/IL1B	2	geneontology_Biological_Process	0.0689655172413793
GO:0033273	response to vitamin	2/29	95/17913	0.0102947083320609	0.0196113138219096	0.00499236134533156	EGFR/TGFB1	2	geneontology_Biological_Process	0.0689655172413793
GO:0034440	lipid oxidation	2/29	95/17913	0.0102947083320609	0.0196113138219096	0.00499236134533156	MAPK14/AKT1	2	geneontology_Biological_Process	0.0689655172413793
GO:0007044	cell-substrate junction assembly	2/29	96/17913	0.0105032632457927	0.0199676634829633	0.00508307562839397	BCL2/VEGFA	2	geneontology_Biological_Process	0.0689655172413793
GO:0010660	regulation of muscle cell apoptotic process	2/29	96/17913	0.0105032632457927	0.0199676634829633	0.00508307562839397	TP53/IFNG	2	geneontology_Biological_Process	0.0689655172413793
GO:0097327	response to antineoplastic agent	2/29	96/17913	0.0105032632457927	0.0199676634829633	0.00508307562839397	EGFR/TGFB1	2	geneontology_Biological_Process	0.0689655172413793
GO:0002062	chondrocyte differentiation	2/29	97/17913	0.0107136941021113	0.0203261167206154	0.00517432540920998	MAPK14/TGFB1	2	geneontology_Biological_Process	0.0689655172413793
GO:0034766	negative regulation of ion transmembrane transport	2/29	97/17913	0.0107136941021113	0.0203261167206154	0.00517432540920998	AKT1/TGFB1	2	geneontology_Biological_Process	0.0689655172413793
GO:0120162	positive regulation of cold-induced thermogenesis	2/29	97/17913	0.0107136941021113	0.0203261167206154	0.00517432540920998	IL4/VEGFA	2	geneontology_Biological_Process	0.0689655172413793
GO:0010522	regulation of calcium ion transport into cytosol	2/29	98/17913	0.0109259947183621	0.0206958283120382	0.00526844117701122	BCL2/TGFB1	2	geneontology_Biological_Process	0.0689655172413793
GO:0033559	unsaturated fatty acid metabolic process	2/29	98/17913	0.0109259947183621	0.0206958283120382	0.00526844117701122	MAPK3/IL1B	2	geneontology_Biological_Process	0.0689655172413793
GO:0090150	establishment of protein localization to membrane	3/29	287/17913	0.0109308429405527	0.0206958283120382	0.00526844117701122	TP53/EGFR/BCL2	3	geneontology_Biological_Process	0.103448275862069
GO:0005976	polysaccharide metabolic process	2/29	99/17913	0.0111401589257879	0.0210349748822295	0.00535477614889532	AKT1/TGFB1	2	geneontology_Biological_Process	0.0689655172413793
GO:0008593	regulation of Notch signaling pathway	2/29	99/17913	0.0111401589257879	0.0210349748822295	0.00535477614889532	AKT1/EGFR	2	geneontology_Biological_Process	0.0689655172413793
GO:0070301	cellular response to hydrogen peroxide	2/29	99/17913	0.0111401589257879	0.0210349748822295	0.00535477614889532	IL6/IL10	2	geneontology_Biological_Process	0.0689655172413793
GO:1902106	negative regulation of leukocyte differentiation	2/29	99/17913	0.0111401589257879	0.0210349748822295	0.00535477614889532	IL2/IL4	2	geneontology_Biological_Process	0.0689655172413793
GO:0010657	muscle cell apoptotic process	2/29	100/17913	0.0113561805695024	0.0213993747445592	0.00544753973441842	TP53/IFNG	2	geneontology_Biological_Process	0.0689655172413793
GO:0032414	positive regulation of ion transmembrane transporter activity	2/29	100/17913	0.0113561805695024	0.0213993747445592	0.00544753973441842	IFNG/CCL2	2	geneontology_Biological_Process	0.0689655172413793
GO:0048259	regulation of receptor-mediated endocytosis	2/29	100/17913	0.0113561805695024	0.0213993747445592	0.00544753973441842	IL4/VEGFA	2	geneontology_Biological_Process	0.0689655172413793
GO:1903522	regulation of blood circulation	3/29	292/17913	0.0114522567408246	0.0215658375247826	0.00548991539353898	AKT1/IL2/EGFR	3	geneontology_Biological_Process	0.103448275862069
GO:0015849	organic acid transport	3/29	293/17913	0.0115582484365207	0.0217360582945905	0.00553324770666591	AKT1/IL1B/NOS2	3	geneontology_Biological_Process	0.103448275862069
GO:0046942	carboxylic acid transport	3/29	293/17913	0.0115582484365207	0.0217360582945905	0.00553324770666591	AKT1/IL1B/NOS2	3	geneontology_Biological_Process	0.103448275862069
GO:0002042	cell migration involved in sprouting angiogenesis	2/29	101/17913	0.011574053508464	0.0217511039299321	0.00553707780438283	AKT1/VEGFA	2	geneontology_Biological_Process	0.0689655172413793
GO:0006690	icosanoid metabolic process	2/29	102/17913	0.0117937716154496	0.0221192742209005	0.00563080121046472	MAPK3/IL1B	2	geneontology_Biological_Process	0.0689655172413793
GO:0031623	receptor internalization	2/29	102/17913	0.0117937716154496	0.0221192742209005	0.00563080121046472	CXCL8/VEGFA	2	geneontology_Biological_Process	0.0689655172413793
GO:0032963	collagen metabolic process	2/29	102/17913	0.0117937716154496	0.0221192742209005	0.00563080121046472	IL6/TGFB1	2	geneontology_Biological_Process	0.0689655172413793
GO:0048524	positive regulation of viral process	2/29	103/17913	0.0120153287770282	0.022519651177927	0.00573272331838529	JUN/SP1	2	geneontology_Biological_Process	0.0689655172413793
GO:0098781	ncRNA transcription	2/29	104/17913	0.0122387188935347	0.0229229230888987	0.00583538238132599	TP53/SP1	2	geneontology_Biological_Process	0.0689655172413793
GO:0016042	lipid catabolic process	3/29	300/17913	0.0123162090405181	0.0230525685667723	0.00586838563027761	AKT1/TNF/IL1B	3	geneontology_Biological_Process	0.103448275862069
GO:0006898	receptor-mediated endocytosis	3/29	301/17913	0.0124267840260304	0.023243924215132	0.00591709815156798	IL4/CXCL8/VEGFA	3	geneontology_Biological_Process	0.103448275862069
GO:0045446	endothelial cell differentiation	2/29	105/17913	0.0124639358790443	0.0232977795405074	0.0059308078523604	TNF/IL1B	2	geneontology_Biological_Process	0.0689655172413793
GO:0030330	DNA damage response, signal transduction by p53 class mediator	2/29	106/17913	0.0126909736613458	0.0236745271714664	0.00602671475216451	TP53/CDKN1A	2	geneontology_Biological_Process	0.0689655172413793
GO:0043279	response to alkaloid	2/29	106/17913	0.0126909736613458	0.0236745271714664	0.00602671475216451	CASP3/BCL2L1	2	geneontology_Biological_Process	0.0689655172413793
GO:0055017	cardiac muscle tissue growth	2/29	106/17913	0.0126909736613458	0.0236745271714664	0.00602671475216451	MAPK1/MAPK14	2	geneontology_Biological_Process	0.0689655172413793
GO:0006024	glycosaminoglycan biosynthetic process	2/29	107/17913	0.0129198261819158	0.0240531433326649	0.00612309731505907	IL1B/TGFB1	2	geneontology_Biological_Process	0.0689655172413793
GO:0014902	myotube differentiation	2/29	107/17913	0.0129198261819158	0.0240531433326649	0.00612309731505907	MAPK14/BCL2	2	geneontology_Biological_Process	0.0689655172413793
GO:0022037	metencephalon development	2/29	107/17913	0.0129198261819158	0.0240531433326649	0.00612309731505907	TP53/BCL2	2	geneontology_Biological_Process	0.0689655172413793
GO:0006023	aminoglycan biosynthetic process	2/29	108/17913	0.0131504873958928	0.0244336055815688	0.00621994982795211	IL1B/TGFB1	2	geneontology_Biological_Process	0.0689655172413793
GO:0032411	positive regulation of transporter activity	2/29	108/17913	0.0131504873958928	0.0244336055815688	0.00621994982795211	IFNG/CCL2	2	geneontology_Biological_Process	0.0689655172413793
GO:0032612	interleukin-1 production	2/29	108/17913	0.0131504873958928	0.0244336055815688	0.00621994982795211	IL10/IL1B	2	geneontology_Biological_Process	0.0689655172413793
GO:0008543	fibroblast growth factor receptor signaling pathway	2/29	109/17913	0.0133829512720512	0.0248489574918099	0.00632568404036782	MAPK3/MAPK1	2	geneontology_Biological_Process	0.0689655172413793
GO:1904062	regulation of cation transmembrane transport	3/29	312/17913	0.0136811875951387	0.0253857988200076	0.00646234525133047	TGFB1/IFNG/CCL2	3	geneontology_Biological_Process	0.103448275862069
GO:0006470	protein dephosphorylation	3/29	313/17913	0.0137986983803746	0.0255868079747865	0.00651351522104737	TNF/BCL2/TGFB1	3	geneontology_Biological_Process	0.103448275862069
GO:0032535	regulation of cellular component size	3/29	315/17913	0.0140354633363909	0.0260085347862509	0.00662087226254721	AKT1/CREB1/VEGFA	3	geneontology_Biological_Process	0.103448275862069
GO:0030968	endoplasmic reticulum unfolded protein response	2/29	112/17913	0.0140910987653528	0.0260596498069266	0.00663388437666176	CXCL8/CCL2	2	geneontology_Biological_Process	0.0689655172413793
GO:0060419	heart growth	2/29	112/17913	0.0140910987653528	0.0260596498069266	0.00663388437666176	MAPK1/MAPK14	2	geneontology_Biological_Process	0.0689655172413793
GO:1903828	negative regulation of cellular protein localization	2/29	112/17913	0.0140910987653528	0.0260596498069266	0.00663388437666176	TGFB1/BCL2L1	2	geneontology_Biological_Process	0.0689655172413793
GO:0010906	regulation of glucose metabolic process	2/29	113/17913	0.0143307132497924	0.0264501310113719	0.00673328736867208	TP53/AKT1	2	geneontology_Biological_Process	0.0689655172413793
GO:0046717	acid secretion	2/29	113/17913	0.0143307132497924	0.0264501310113719	0.00673328736867208	IL1B/NOS2	2	geneontology_Biological_Process	0.0689655172413793
GO:0071482	cellular response to light stimulus	2/29	113/17913	0.0143307132497924	0.0264501310113719	0.00673328736867208	TP53/CDKN1A	2	geneontology_Biological_Process	0.0689655172413793
GO:0042752	regulation of circadian rhythm	2/29	114/17913	0.0145721004439185	0.0268778583303778	0.00684217193159015	TP53/CREB1	2	geneontology_Biological_Process	0.0689655172413793
GO:0010822	positive regulation of mitochondrion organization	2/29	115/17913	0.0148152543977784	0.0272722021179712	0.00694255820350598	TP53/BCL2	2	geneontology_Biological_Process	0.0689655172413793
GO:0017015	regulation of transforming growth factor beta receptor signaling pathway	2/29	115/17913	0.0148152543977784	0.0272722021179712	0.00694255820350598	TP53/TGFB1	2	geneontology_Biological_Process	0.0689655172413793
GO:0042471	ear morphogenesis	2/29	115/17913	0.0148152543977784	0.0272722021179712	0.00694255820350598	MAPK3/MAPK1	2	geneontology_Biological_Process	0.0689655172413793
GO:0010633	negative regulation of epithelial cell migration	2/29	116/17913	0.015060169174875	0.0277047468583343	0.00705266911507085	IL4/TGFB1	2	geneontology_Biological_Process	0.0689655172413793
GO:0001952	regulation of cell-matrix adhesion	2/29	117/17913	0.0153068388521408	0.0281213974165567	0.00715873391828951	BCL2/VEGFA	2	geneontology_Biological_Process	0.0689655172413793
GO:1903844	regulation of cellular response to transforming growth factor beta stimulus	2/29	117/17913	0.0153068388521408	0.0281213974165567	0.00715873391828951	TP53/TGFB1	2	geneontology_Biological_Process	0.0689655172413793
GO:0007596	blood coagulation	3/29	331/17913	0.0160136353398012	0.0288311635562614	0.0073394157977528	MAPK3/MAPK1/IL6	3	geneontology_Biological_Process	0.103448275862069
GO:0006527	arginine catabolic process	1/29	10/17913	0.0160759340389057	0.0288311635562614	0.0073394157977528	NOS2	1	geneontology_Biological_Process	0.0344827586206897
GO:0010918	positive regulation of mitochondrial membrane potential	1/29	10/17913	0.0160759340389057	0.0288311635562614	0.0073394157977528	AKT1	1	geneontology_Biological_Process	0.0344827586206897
GO:0010944	negative regulation of transcription by competitive promoter binding	1/29	10/17913	0.0160759340389057	0.0288311635562614	0.0073394157977528	CREB1	1	geneontology_Biological_Process	0.0344827586206897
GO:0014041	regulation of neuron maturation	1/29	10/17913	0.0160759340389057	0.0288311635562614	0.0073394157977528	BCL2	1	geneontology_Biological_Process	0.0344827586206897
GO:0021548	pons development	1/29	10/17913	0.0160759340389057	0.0288311635562614	0.0073394157977528	BCL2	1	geneontology_Biological_Process	0.0344827586206897
GO:0032025	response to cobalt ion	1/29	10/17913	0.0160759340389057	0.0288311635562614	0.0073394157977528	CASP3	1	geneontology_Biological_Process	0.0344827586206897
GO:0032070	regulation of deoxyribonuclease activity	1/29	10/17913	0.0160759340389057	0.0288311635562614	0.0073394157977528	AKT1	1	geneontology_Biological_Process	0.0344827586206897
GO:0032308	positive regulation of prostaglandin secretion	1/29	10/17913	0.0160759340389057	0.0288311635562614	0.0073394157977528	IL1B	1	geneontology_Biological_Process	0.0344827586206897
GO:0032429	regulation of phospholipase A2 activity	1/29	10/17913	0.0160759340389057	0.0288311635562614	0.0073394157977528	EGFR	1	geneontology_Biological_Process	0.0344827586206897
GO:0032621	interleukin-18 production	1/29	10/17913	0.0160759340389057	0.0288311635562614	0.0073394157977528	IL10	1	geneontology_Biological_Process	0.0344827586206897
GO:0034350	regulation of glial cell apoptotic process	1/29	10/17913	0.0160759340389057	0.0288311635562614	0.0073394157977528	CCL2	1	geneontology_Biological_Process	0.0344827586206897
GO:0045351	type I interferon biosynthetic process	1/29	10/17913	0.0160759340389057	0.0288311635562614	0.0073394157977528	IL10	1	geneontology_Biological_Process	0.0344827586206897
GO:0045657	positive regulation of monocyte differentiation	1/29	10/17913	0.0160759340389057	0.0288311635562614	0.0073394157977528	JUN	1	geneontology_Biological_Process	0.0344827586206897
GO:0045792	negative regulation of cell size	1/29	10/17913	0.0160759340389057	0.0288311635562614	0.0073394157977528	AKT1	1	geneontology_Biological_Process	0.0344827586206897
GO:0046322	negative regulation of fatty acid oxidation	1/29	10/17913	0.0160759340389057	0.0288311635562614	0.0073394157977528	AKT1	1	geneontology_Biological_Process	0.0344827586206897
GO:0048739	cardiac muscle fiber development	1/29	10/17913	0.0160759340389057	0.0288311635562614	0.0073394157977528	VEGFA	1	geneontology_Biological_Process	0.0344827586206897
GO:0060068	vagina development	1/29	10/17913	0.0160759340389057	0.0288311635562614	0.0073394157977528	ESR1	1	geneontology_Biological_Process	0.0344827586206897
GO:0060352	cell adhesion molecule production	1/29	10/17913	0.0160759340389057	0.0288311635562614	0.0073394157977528	IL1B	1	geneontology_Biological_Process	0.0344827586206897
GO:0060525	prostate glandular acinus development	1/29	10/17913	0.0160759340389057	0.0288311635562614	0.0073394157977528	ESR1	1	geneontology_Biological_Process	0.0344827586206897
GO:0070391	response to lipoteichoic acid	1/29	10/17913	0.0160759340389057	0.0288311635562614	0.0073394157977528	MAPK14	1	geneontology_Biological_Process	0.0344827586206897
GO:0071104	response to interleukin-9	1/29	10/17913	0.0160759340389057	0.0288311635562614	0.0073394157977528	STAT1	1	geneontology_Biological_Process	0.0344827586206897
GO:0071223	cellular response to lipoteichoic acid	1/29	10/17913	0.0160759340389057	0.0288311635562614	0.0073394157977528	MAPK14	1	geneontology_Biological_Process	0.0344827586206897
GO:0071609	chemokine (C-C motif) ligand 5 production	1/29	10/17913	0.0160759340389057	0.0288311635562614	0.0073394157977528	IL10	1	geneontology_Biological_Process	0.0344827586206897
GO:0071639	positive regulation of monocyte chemotactic protein-1 production	1/29	10/17913	0.0160759340389057	0.0288311635562614	0.0073394157977528	IL1B	1	geneontology_Biological_Process	0.0344827586206897
GO:0071803	positive regulation of podosome assembly	1/29	10/17913	0.0160759340389057	0.0288311635562614	0.0073394157977528	TNF	1	geneontology_Biological_Process	0.0344827586206897
GO:0072203	cell proliferation involved in metanephros development	1/29	10/17913	0.0160759340389057	0.0288311635562614	0.0073394157977528	STAT1	1	geneontology_Biological_Process	0.0344827586206897
GO:0090037	positive regulation of protein kinase C signaling	1/29	10/17913	0.0160759340389057	0.0288311635562614	0.0073394157977528	VEGFA	1	geneontology_Biological_Process	0.0344827586206897
GO:0090154	positive regulation of sphingolipid biosynthetic process	1/29	10/17913	0.0160759340389057	0.0288311635562614	0.0073394157977528	TNF	1	geneontology_Biological_Process	0.0344827586206897
GO:0090336	positive regulation of brown fat cell differentiation	1/29	10/17913	0.0160759340389057	0.0288311635562614	0.0073394157977528	MAPK14	1	geneontology_Biological_Process	0.0344827586206897
GO:0097050	type B pancreatic cell apoptotic process	1/29	10/17913	0.0160759340389057	0.0288311635562614	0.0073394157977528	IL6	1	geneontology_Biological_Process	0.0344827586206897
GO:0097278	complement-dependent cytotoxicity	1/29	10/17913	0.0160759340389057	0.0288311635562614	0.0073394157977528	IL4	1	geneontology_Biological_Process	0.0344827586206897
GO:1901033	positive regulation of response to reactive oxygen species	1/29	10/17913	0.0160759340389057	0.0288311635562614	0.0073394157977528	TNF	1	geneontology_Biological_Process	0.0344827586206897
GO:1901725	regulation of histone deacetylase activity	1/29	10/17913	0.0160759340389057	0.0288311635562614	0.0073394157977528	VEGFA	1	geneontology_Biological_Process	0.0344827586206897
GO:2000304	positive regulation of ceramide biosynthetic process	1/29	10/17913	0.0160759340389057	0.0288311635562614	0.0073394157977528	TNF	1	geneontology_Biological_Process	0.0344827586206897
GO:2000317	negative regulation of T-helper 17 type immune response	1/29	10/17913	0.0160759340389057	0.0288311635562614	0.0073394157977528	IL2	1	geneontology_Biological_Process	0.0344827586206897
GO:2000425	regulation of apoptotic cell clearance	1/29	10/17913	0.0160759340389057	0.0288311635562614	0.0073394157977528	CCL2	1	geneontology_Biological_Process	0.0344827586206897
GO:0006869	lipid transport	3/29	332/17913	0.0161422526914072	0.0289314844057569	0.00736495401185207	AKT1/IL1B/NOS2	3	geneontology_Biological_Process	0.103448275862069
GO:0055007	cardiac muscle cell differentiation	2/29	121/17913	0.0163109485701701	0.0291962836641388	0.00743236273284973	TGFB1/VEGFA	2	geneontology_Biological_Process	0.0689655172413793
GO:0090101	negative regulation of transmembrane receptor protein serine/threonine kinase signaling pathway	2/29	121/17913	0.0163109485701701	0.0291962836641388	0.00743236273284973	TP53/TGFB1	2	geneontology_Biological_Process	0.0689655172413793
GO:0030198	extracellular matrix organization	3/29	334/17913	0.0164012521250923	0.0293390819464906	0.00746871423033054	IL6/TNF/TGFB1	3	geneontology_Biological_Process	0.103448275862069
GO:0032368	regulation of lipid transport	2/29	122/17913	0.0165663043705348	0.0295963399235132	0.00753420320225404	AKT1/IL1B	2	geneontology_Biological_Process	0.0689655172413793
GO:0042552	myelination	2/29	122/17913	0.0165663043705348	0.0295963399235132	0.00753420320225404	AKT1/TGFB1	2	geneontology_Biological_Process	0.0689655172413793
GO:0007599	hemostasis	3/29	336/17913	0.0166626066116165	0.0297493175058137	0.00757314599698542	MAPK3/MAPK1/IL6	3	geneontology_Biological_Process	0.103448275862069
GO:0050817	coagulation	3/29	337/17913	0.0167941677573142	0.0299650099485497	0.00762805382332351	MAPK3/MAPK1/IL6	3	geneontology_Biological_Process	0.103448275862069
GO:0032479	regulation of type I interferon production	2/29	123/17913	0.0168233798132658	0.0299787465086776	0.00763155067582523	STAT1/IL10	2	geneontology_Biological_Process	0.0689655172413793
GO:0034620	cellular response to unfolded protein	2/29	123/17913	0.0168233798132658	0.0299787465086776	0.00763155067582523	CXCL8/CCL2	2	geneontology_Biological_Process	0.0689655172413793
GO:0003158	endothelium development	2/29	124/17913	0.0170821690685921	0.0303816242464367	0.0077341093959165	TNF/IL1B	2	geneontology_Biological_Process	0.0689655172413793
GO:0008360	regulation of cell shape	2/29	124/17913	0.0170821690685921	0.0303816242464367	0.0077341093959165	CCL2/VEGFA	2	geneontology_Biological_Process	0.0689655172413793
GO:0046330	positive regulation of JNK cascade	2/29	124/17913	0.0170821690685921	0.0303816242464367	0.0077341093959165	TNF/IL1B	2	geneontology_Biological_Process	0.0689655172413793
GO:0030111	regulation of Wnt signaling pathway	3/29	341/17913	0.017326311788948	0.0307468263573511	0.00782707720614683	MAPK14/ESR1/EGFR	3	geneontology_Biological_Process	0.103448275862069
GO:0032606	type I interferon production	2/29	125/17913	0.0173426663199698	0.0307468263573511	0.00782707720614683	STAT1/IL10	2	geneontology_Biological_Process	0.0689655172413793
GO:0035296	regulation of tube diameter	2/29	125/17913	0.0173426663199698	0.0307468263573511	0.00782707720614683	AKT1/EGFR	2	geneontology_Biological_Process	0.0689655172413793
GO:0046887	positive regulation of hormone secretion	2/29	125/17913	0.0173426663199698	0.0307468263573511	0.00782707720614683	CREB1/EGFR	2	geneontology_Biological_Process	0.0689655172413793
GO:0097746	regulation of blood vessel diameter	2/29	125/17913	0.0173426663199698	0.0307468263573511	0.00782707720614683	AKT1/EGFR	2	geneontology_Biological_Process	0.0689655172413793
GO:0007272	ensheathment of neurons	2/29	126/17913	0.0176048657640564	0.0307592431127918	0.00783023808208097	AKT1/TGFB1	2	geneontology_Biological_Process	0.0689655172413793
GO:0008366	axon ensheathment	2/29	126/17913	0.0176048657640564	0.0307592431127918	0.00783023808208097	AKT1/TGFB1	2	geneontology_Biological_Process	0.0689655172413793
GO:0000185	activation of MAPKKK activity	1/29	11/17913	0.0176697338441262	0.0307592431127918	0.00783023808208097	TNF	1	geneontology_Biological_Process	0.0344827586206897
GO:0002923	regulation of humoral immune response mediated by circulating immunoglobulin	1/29	11/17913	0.0176697338441262	0.0307592431127918	0.00783023808208097	TNF	1	geneontology_Biological_Process	0.0344827586206897
GO:0009629	response to gravity	1/29	11/17913	0.0176697338441262	0.0307592431127918	0.00783023808208097	FOS	1	geneontology_Biological_Process	0.0344827586206897
GO:0031392	regulation of prostaglandin biosynthetic process	1/29	11/17913	0.0176697338441262	0.0307592431127918	0.00783023808208097	IL1B	1	geneontology_Biological_Process	0.0344827586206897
GO:0032306	regulation of prostaglandin secretion	1/29	11/17913	0.0176697338441262	0.0307592431127918	0.00783023808208097	IL1B	1	geneontology_Biological_Process	0.0344827586206897
GO:0032494	response to peptidoglycan	1/29	11/17913	0.0176697338441262	0.0307592431127918	0.00783023808208097	IL6	1	geneontology_Biological_Process	0.0344827586206897
GO:0034115	negative regulation of heterotypic cell-cell adhesion	1/29	11/17913	0.0176697338441262	0.0307592431127918	0.00783023808208097	IL10	1	geneontology_Biological_Process	0.0344827586206897
GO:0035747	natural killer cell chemotaxis	1/29	11/17913	0.0176697338441262	0.0307592431127918	0.00783023808208097	CCL2	1	geneontology_Biological_Process	0.0344827586206897
GO:0042501	serine phosphorylation of STAT protein	1/29	11/17913	0.0176697338441262	0.0307592431127918	0.00783023808208097	IFNG	1	geneontology_Biological_Process	0.0344827586206897
GO:0043117	positive regulation of vascular permeability	1/29	11/17913	0.0176697338441262	0.0307592431127918	0.00783023808208097	TGFB1	1	geneontology_Biological_Process	0.0344827586206897
GO:0046007	negative regulation of activated T cell proliferation	1/29	11/17913	0.0176697338441262	0.0307592431127918	0.00783023808208097	CASP3	1	geneontology_Biological_Process	0.0344827586206897
GO:0048875	chemical homeostasis within a tissue	1/29	11/17913	0.0176697338441262	0.0307592431127918	0.00783023808208097	VEGFA	1	geneontology_Biological_Process	0.0344827586206897
GO:0051974	negative regulation of telomerase activity	1/29	11/17913	0.0176697338441262	0.0307592431127918	0.00783023808208097	TP53	1	geneontology_Biological_Process	0.0344827586206897
GO:0060947	cardiac vascular smooth muscle cell differentiation	1/29	11/17913	0.0176697338441262	0.0307592431127918	0.00783023808208097	VEGFA	1	geneontology_Biological_Process	0.0344827586206897
GO:0060992	response to fungicide	1/29	11/17913	0.0176697338441262	0.0307592431127918	0.00783023808208097	BCL2L1	1	geneontology_Biological_Process	0.0344827586206897
GO:0070106	interleukin-27-mediated signaling pathway	1/29	11/17913	0.0176697338441262	0.0307592431127918	0.00783023808208097	STAT1	1	geneontology_Biological_Process	0.0344827586206897
GO:0070243	regulation of thymocyte apoptotic process	1/29	11/17913	0.0176697338441262	0.0307592431127918	0.00783023808208097	TP53	1	geneontology_Biological_Process	0.0344827586206897
GO:0070587	regulation of cell-cell adhesion involved in gastrulation	1/29	11/17913	0.0176697338441262	0.0307592431127918	0.00783023808208097	IL10	1	geneontology_Biological_Process	0.0344827586206897
GO:0070673	response to interleukin-18	1/29	11/17913	0.0176697338441262	0.0307592431127918	0.00783023808208097	AKT1	1	geneontology_Biological_Process	0.0344827586206897
GO:0070757	interleukin-35-mediated signaling pathway	1/29	11/17913	0.0176697338441262	0.0307592431127918	0.00783023808208097	STAT1	1	geneontology_Biological_Process	0.0344827586206897
GO:0071679	commissural neuron axon guidance	1/29	11/17913	0.0176697338441262	0.0307592431127918	0.00783023808208097	VEGFA	1	geneontology_Biological_Process	0.0344827586206897
GO:0072610	interleukin-12 secretion	1/29	11/17913	0.0176697338441262	0.0307592431127918	0.00783023808208097	MAPK14	1	geneontology_Biological_Process	0.0344827586206897
GO:0140052	cellular response to oxidised low-density lipoprotein particle stimulus	1/29	11/17913	0.0176697338441262	0.0307592431127918	0.00783023808208097	AKT1	1	geneontology_Biological_Process	0.0344827586206897
GO:1901201	regulation of extracellular matrix assembly	1/29	11/17913	0.0176697338441262	0.0307592431127918	0.00783023808208097	TGFB1	1	geneontology_Biological_Process	0.0344827586206897
GO:1902065	response to L-glutamate	1/29	11/17913	0.0176697338441262	0.0307592431127918	0.00783023808208097	CREB1	1	geneontology_Biological_Process	0.0344827586206897
GO:1990440	positive regulation of transcription from RNA polymerase II promoter in response to endoplasmic reticulum stress	1/29	11/17913	0.0176697338441262	0.0307592431127918	0.00783023808208097	TP53	1	geneontology_Biological_Process	0.0344827586206897
GO:2000551	regulation of T-helper 2 cell cytokine production	1/29	11/17913	0.0176697338441262	0.0307592431127918	0.00783023808208097	IL6	1	geneontology_Biological_Process	0.0344827586206897
GO:0002576	platelet degranulation	2/29	128/17913	0.0181343480828423	0.0314893633064682	0.00801610139881011	TGFB1/VEGFA	2	geneontology_Biological_Process	0.0689655172413793
GO:0008286	insulin receptor signaling pathway	2/29	128/17913	0.0181343480828423	0.0314893633064682	0.00801610139881011	AKT1/IL1B	2	geneontology_Biological_Process	0.0689655172413793
GO:0045216	cell-cell junction organization	2/29	128/17913	0.0181343480828423	0.0314893633064682	0.00801610139881011	TNF/TGFB1	2	geneontology_Biological_Process	0.0689655172413793
GO:0045667	regulation of osteoblast differentiation	2/29	128/17913	0.0181343480828423	0.0314893633064682	0.00801610139881011	IL6/TNF	2	geneontology_Biological_Process	0.0689655172413793
GO:0003206	cardiac chamber morphogenesis	2/29	129/17913	0.0184016194166381	0.0319335699341035	0.00812918102301504	TP53/TGFB1	2	geneontology_Biological_Process	0.0689655172413793
GO:0010639	negative regulation of organelle organization	3/29	352/17913	0.0188384945707856	0.0326713655063967	0.0083169982253362	TP53/AKT1/BCL2L1	3	geneontology_Biological_Process	0.103448275862069
GO:0002862	negative regulation of inflammatory response to antigenic stimulus	1/29	12/17913	0.0192610408332072	0.0328159989503199	0.00835381689140014	IL10	1	geneontology_Biological_Process	0.0344827586206897
GO:0002863	positive regulation of inflammatory response to antigenic stimulus	1/29	12/17913	0.0192610408332072	0.0328159989503199	0.00835381689140014	TNF	1	geneontology_Biological_Process	0.0344827586206897
GO:0002903	negative regulation of B cell apoptotic process	1/29	12/17913	0.0192610408332072	0.0328159989503199	0.00835381689140014	IL2	1	geneontology_Biological_Process	0.0344827586206897
GO:0006983	ER overload response	1/29	12/17913	0.0192610408332072	0.0328159989503199	0.00835381689140014	TP53	1	geneontology_Biological_Process	0.0344827586206897
GO:0010960	magnesium ion homeostasis	1/29	12/17913	0.0192610408332072	0.0328159989503199	0.00835381689140014	EGFR	1	geneontology_Biological_Process	0.0344827586206897
GO:0038110	interleukin-2-mediated signaling pathway	1/29	12/17913	0.0192610408332072	0.0328159989503199	0.00835381689140014	IL2	1	geneontology_Biological_Process	0.0344827586206897
GO:0043922	negative regulation by host of viral transcription	1/29	12/17913	0.0192610408332072	0.0328159989503199	0.00835381689140014	JUN	1	geneontology_Biological_Process	0.0344827586206897
GO:0045779	negative regulation of bone resorption	1/29	12/17913	0.0192610408332072	0.0328159989503199	0.00835381689140014	IL6	1	geneontology_Biological_Process	0.0344827586206897
GO:0048642	negative regulation of skeletal muscle tissue development	1/29	12/17913	0.0192610408332072	0.0328159989503199	0.00835381689140014	TGFB1	1	geneontology_Biological_Process	0.0344827586206897
GO:0051095	regulation of helicase activity	1/29	12/17913	0.0192610408332072	0.0328159989503199	0.00835381689140014	TP53	1	geneontology_Biological_Process	0.0344827586206897
GO:0051798	positive regulation of hair follicle development	1/29	12/17913	0.0192610408332072	0.0328159989503199	0.00835381689140014	TNF	1	geneontology_Biological_Process	0.0344827586206897
GO:0060391	positive regulation of SMAD protein signal transduction	1/29	12/17913	0.0192610408332072	0.0328159989503199	0.00835381689140014	TGFB1	1	geneontology_Biological_Process	0.0344827586206897
GO:0060442	branching involved in prostate gland morphogenesis	1/29	12/17913	0.0192610408332072	0.0328159989503199	0.00835381689140014	ESR1	1	geneontology_Biological_Process	0.0344827586206897
GO:0060670	branching involved in labyrinthine layer morphogenesis	1/29	12/17913	0.0192610408332072	0.0328159989503199	0.00835381689140014	IL10	1	geneontology_Biological_Process	0.0344827586206897
GO:0070486	leukocyte aggregation	1/29	12/17913	0.0192610408332072	0.0328159989503199	0.00835381689140014	IL1B	1	geneontology_Biological_Process	0.0344827586206897
GO:0070586	cell-cell adhesion involved in gastrulation	1/29	12/17913	0.0192610408332072	0.0328159989503199	0.00835381689140014	IL10	1	geneontology_Biological_Process	0.0344827586206897
GO:0072540	T-helper 17 cell lineage commitment	1/29	12/17913	0.0192610408332072	0.0328159989503199	0.00835381689140014	IL6	1	geneontology_Biological_Process	0.0344827586206897
GO:0097201	negative regulation of transcription from RNA polymerase II promoter in response to stress	1/29	12/17913	0.0192610408332072	0.0328159989503199	0.00835381689140014	JUN	1	geneontology_Biological_Process	0.0344827586206897
GO:0097284	hepatocyte apoptotic process	1/29	12/17913	0.0192610408332072	0.0328159989503199	0.00835381689140014	BCL2L1	1	geneontology_Biological_Process	0.0344827586206897
GO:0150065	regulation of deacetylase activity	1/29	12/17913	0.0192610408332072	0.0328159989503199	0.00835381689140014	VEGFA	1	geneontology_Biological_Process	0.0344827586206897
GO:1900118	negative regulation of execution phase of apoptosis	1/29	12/17913	0.0192610408332072	0.0328159989503199	0.00835381689140014	BCL2L1	1	geneontology_Biological_Process	0.0344827586206897
GO:1900376	regulation of secondary metabolite biosynthetic process	1/29	12/17913	0.0192610408332072	0.0328159989503199	0.00835381689140014	SP1	1	geneontology_Biological_Process	0.0344827586206897
GO:1900402	regulation of carbohydrate metabolic process by regulation of transcription from RNA polymerase II promoter	1/29	12/17913	0.0192610408332072	0.0328159989503199	0.00835381689140014	TP53	1	geneontology_Biological_Process	0.0344827586206897
GO:1902004	positive regulation of amyloid-beta formation	1/29	12/17913	0.0192610408332072	0.0328159989503199	0.00835381689140014	CASP3	1	geneontology_Biological_Process	0.0344827586206897
GO:1902510	regulation of apoptotic DNA fragmentation	1/29	12/17913	0.0192610408332072	0.0328159989503199	0.00835381689140014	IL6	1	geneontology_Biological_Process	0.0344827586206897
GO:1903909	regulation of receptor clustering	1/29	12/17913	0.0192610408332072	0.0328159989503199	0.00835381689140014	TGFB1	1	geneontology_Biological_Process	0.0344827586206897
GO:2000121	regulation of removal of superoxide radicals	1/29	12/17913	0.0192610408332072	0.0328159989503199	0.00835381689140014	TNF	1	geneontology_Biological_Process	0.0344827586206897
GO:2000341	regulation of chemokine (C-X-C motif) ligand 2 production	1/29	12/17913	0.0192610408332072	0.0328159989503199	0.00835381689140014	TNF	1	geneontology_Biological_Process	0.0344827586206897
GO:0045666	positive regulation of neuron differentiation	3/29	355/17913	0.0192633563985372	0.0328159989503199	0.00835381689140014	IL2/BCL2/VEGFA	3	geneontology_Biological_Process	0.103448275862069
GO:0050880	regulation of blood vessel size	2/29	133/17913	0.0194874385484507	0.033177453411443	0.00844583067977739	AKT1/EGFR	2	geneontology_Biological_Process	0.0689655172413793
GO:0030260	entry into host cell	2/29	134/17913	0.0197630481897761	0.0335238072458344	0.00853400037153415	EGFR/CXCL8	2	geneontology_Biological_Process	0.0689655172413793
GO:0034332	adherens junction organization	2/29	134/17913	0.0197630481897761	0.0335238072458344	0.00853400037153415	BCL2/VEGFA	2	geneontology_Biological_Process	0.0689655172413793
GO:0035150	regulation of tube size	2/29	134/17913	0.0197630481897761	0.0335238072458344	0.00853400037153415	AKT1/EGFR	2	geneontology_Biological_Process	0.0689655172413793
GO:0044409	entry into host	2/29	134/17913	0.0197630481897761	0.0335238072458344	0.00853400037153415	EGFR/CXCL8	2	geneontology_Biological_Process	0.0689655172413793
GO:0051806	entry into cell of other organism involved in symbiotic interaction	2/29	134/17913	0.0197630481897761	0.0335238072458344	0.00853400037153415	EGFR/CXCL8	2	geneontology_Biological_Process	0.0689655172413793
GO:0051828	entry into other organism involved in symbiotic interaction	2/29	134/17913	0.0197630481897761	0.0335238072458344	0.00853400037153415	EGFR/CXCL8	2	geneontology_Biological_Process	0.0689655172413793
GO:0009165	nucleotide biosynthetic process	3/29	360/17913	0.0199833410389618	0.0338768682941523	0.00862387748768102	TP53/MAPK1/TGFB1	3	geneontology_Biological_Process	0.103448275862069
GO:0002920	regulation of humoral immune response	2/29	135/17913	0.0200403083836587	0.0339321624940806	0.00863795347610536	TNF/IL1B	2	geneontology_Biological_Process	0.0689655172413793
GO:0035967	cellular response to topologically incorrect protein	2/29	135/17913	0.0200403083836587	0.0339321624940806	0.00863795347610536	CXCL8/CCL2	2	geneontology_Biological_Process	0.0689655172413793
GO:0035304	regulation of protein dephosphorylation	2/29	137/17913	0.0205997577512067	0.0348581621961513	0.00887368093222518	TNF/TGFB1	2	geneontology_Biological_Process	0.0689655172413793
GO:1901293	nucleoside phosphate biosynthetic process	3/29	365/17913	0.0207181964049161	0.0348581621961513	0.00887368093222518	TP53/MAPK1/TGFB1	3	geneontology_Biological_Process	0.103448275862069
GO:0003337	mesenchymal to epithelial transition involved in metanephros morphogenesis	1/29	13/17913	0.0208498587660511	0.0348581621961513	0.00887368093222518	STAT1	1	geneontology_Biological_Process	0.0344827586206897
GO:0006089	lactate metabolic process	1/29	13/17913	0.0208498587660511	0.0348581621961513	0.00887368093222518	TP53	1	geneontology_Biological_Process	0.0344827586206897
GO:0006206	pyrimidine nucleobase metabolic process	1/29	13/17913	0.0208498587660511	0.0348581621961513	0.00887368093222518	MAPK1	1	geneontology_Biological_Process	0.0344827586206897
GO:0007183	SMAD protein complex assembly	1/29	13/17913	0.0208498587660511	0.0348581621961513	0.00887368093222518	TGFB1	1	geneontology_Biological_Process	0.0344827586206897
GO:0007494	midgut development	1/29	13/17913	0.0208498587660511	0.0348581621961513	0.00887368093222518	EGFR	1	geneontology_Biological_Process	0.0344827586206897
GO:0031953	negative regulation of protein autophosphorylation	1/29	13/17913	0.0208498587660511	0.0348581621961513	0.00887368093222518	JUN	1	geneontology_Biological_Process	0.0344827586206897
GO:0032725	positive regulation of granulocyte macrophage colony-stimulating factor production	1/29	13/17913	0.0208498587660511	0.0348581621961513	0.00887368093222518	IL1B	1	geneontology_Biological_Process	0.0344827586206897
GO:0042635	positive regulation of hair cycle	1/29	13/17913	0.0208498587660511	0.0348581621961513	0.00887368093222518	TNF	1	geneontology_Biological_Process	0.0344827586206897
GO:0043374	CD8-positive, alpha-beta T cell differentiation	1/29	13/17913	0.0208498587660511	0.0348581621961513	0.00887368093222518	BCL2	1	geneontology_Biological_Process	0.0344827586206897
GO:0045086	positive regulation of interleukin-2 biosynthetic process	1/29	13/17913	0.0208498587660511	0.0348581621961513	0.00887368093222518	IL1B	1	geneontology_Biological_Process	0.0344827586206897
GO:0060312	regulation of blood vessel remodeling	1/29	13/17913	0.0208498587660511	0.0348581621961513	0.00887368093222518	TGFB1	1	geneontology_Biological_Process	0.0344827586206897
GO:0060576	intestinal epithelial cell development	1/29	13/17913	0.0208498587660511	0.0348581621961513	0.00887368093222518	CDKN1A	1	geneontology_Biological_Process	0.0344827586206897
GO:0060712	spongiotrophoblast layer development	1/29	13/17913	0.0208498587660511	0.0348581621961513	0.00887368093222518	AKT1	1	geneontology_Biological_Process	0.0344827586206897
GO:0061888	regulation of astrocyte activation	1/29	13/17913	0.0208498587660511	0.0348581621961513	0.00887368093222518	IL6	1	geneontology_Biological_Process	0.0344827586206897
GO:0071352	cellular response to interleukin-2	1/29	13/17913	0.0208498587660511	0.0348581621961513	0.00887368093222518	IL2	1	geneontology_Biological_Process	0.0344827586206897
GO:0072182	regulation of nephron tubule epithelial cell differentiation	1/29	13/17913	0.0208498587660511	0.0348581621961513	0.00887368093222518	STAT1	1	geneontology_Biological_Process	0.0344827586206897
GO:0090594	inflammatory response to wounding	1/29	13/17913	0.0208498587660511	0.0348581621961513	0.00887368093222518	TGFB1	1	geneontology_Biological_Process	0.0344827586206897
GO:1903960	negative regulation of anion transmembrane transport	1/29	13/17913	0.0208498587660511	0.0348581621961513	0.00887368093222518	AKT1	1	geneontology_Biological_Process	0.0344827586206897
GO:2001279	regulation of unsaturated fatty acid biosynthetic process	1/29	13/17913	0.0208498587660511	0.0348581621961513	0.00887368093222518	IL1B	1	geneontology_Biological_Process	0.0344827586206897
GO:0010675	regulation of cellular carbohydrate metabolic process	2/29	138/17913	0.0208819356182208	0.0348908600527466	0.00888200467416433	TP53/AKT1	2	geneontology_Biological_Process	0.0689655172413793
GO:0002433	immune response-regulating cell surface receptor signaling pathway involved in phagocytosis	2/29	139/17913	0.0211657414244398	0.0353227073951579	0.00899193805236206	MAPK3/MAPK1	2	geneontology_Biological_Process	0.0689655172413793
GO:0038096	Fc-gamma receptor signaling pathway involved in phagocytosis	2/29	139/17913	0.0211657414244398	0.0353227073951579	0.00899193805236206	MAPK3/MAPK1	2	geneontology_Biological_Process	0.0689655172413793
GO:0016482	cytosolic transport	2/29	140/17913	0.0214511695487203	0.0357562257968202	0.00910229682437514	MAPK3/MAPK1	2	geneontology_Biological_Process	0.0689655172413793
GO:1904064	positive regulation of cation transmembrane transport	2/29	140/17913	0.0214511695487203	0.0357562257968202	0.00910229682437514	IFNG/CCL2	2	geneontology_Biological_Process	0.0689655172413793
GO:0052548	regulation of endopeptidase activity	3/29	370/17913	0.0214679411213044	0.0357627925314258	0.00910396848759504	AKT1/TNF/VEGFA	3	geneontology_Biological_Process	0.103448275862069
GO:0030900	forebrain development	3/29	371/17913	0.0216196781950425	0.0359940520487357	0.00916283915202079	CREB1/CASP3/EGFR	3	geneontology_Biological_Process	0.103448275862069
GO:0038094	Fc-gamma receptor signaling pathway	2/29	141/17913	0.0217382143827473	0.036169793125204	0.00920757674405132	MAPK3/MAPK1	2	geneontology_Biological_Process	0.0689655172413793
GO:0002431	Fc receptor mediated stimulatory signaling pathway	2/29	142/17913	0.0220268703310098	0.0366282145659453	0.00932427496740398	MAPK3/MAPK1	2	geneontology_Biological_Process	0.0689655172413793
GO:0008203	cholesterol metabolic process	2/29	143/17913	0.0223171318107766	0.0368254802259828	0.00937449197299961	SP1/IL4	2	geneontology_Biological_Process	0.0689655172413793
GO:0106106	cold-induced thermogenesis	2/29	143/17913	0.0223171318107766	0.0368254802259828	0.00937449197299961	IL4/VEGFA	2	geneontology_Biological_Process	0.0689655172413793
GO:0120161	regulation of cold-induced thermogenesis	2/29	143/17913	0.0223171318107766	0.0368254802259828	0.00937449197299961	IL4/VEGFA	2	geneontology_Biological_Process	0.0689655172413793
GO:1903670	regulation of sprouting angiogenesis	2/29	143/17913	0.0223171318107766	0.0368254802259828	0.00937449197299961	IL10/VEGFA	2	geneontology_Biological_Process	0.0689655172413793
GO:0018205	peptidyl-lysine modification	3/29	376/17913	0.0223873101231696	0.0368254802259828	0.00937449197299961	MAPK3/IL1B/TGFB1	3	geneontology_Biological_Process	0.103448275862069
GO:0006525	arginine metabolic process	1/29	14/17913	0.0224361913971004	0.0368254802259828	0.00937449197299961	NOS2	1	geneontology_Biological_Process	0.0344827586206897
GO:0010935	regulation of macrophage cytokine production	1/29	14/17913	0.0224361913971004	0.0368254802259828	0.00937449197299961	TGFB1	1	geneontology_Biological_Process	0.0344827586206897
GO:0014854	response to inactivity	1/29	14/17913	0.0224361913971004	0.0368254802259828	0.00937449197299961	IL10	1	geneontology_Biological_Process	0.0344827586206897
GO:0042976	activation of Janus kinase activity	1/29	14/17913	0.0224361913971004	0.0368254802259828	0.00937449197299961	IL4	1	geneontology_Biological_Process	0.0344827586206897
GO:0043455	regulation of secondary metabolic process	1/29	14/17913	0.0224361913971004	0.0368254802259828	0.00937449197299961	SP1	1	geneontology_Biological_Process	0.0344827586206897
GO:0045651	positive regulation of macrophage differentiation	1/29	14/17913	0.0224361913971004	0.0368254802259828	0.00937449197299961	TGFB1	1	geneontology_Biological_Process	0.0344827586206897
GO:0046851	negative regulation of bone remodeling	1/29	14/17913	0.0224361913971004	0.0368254802259828	0.00937449197299961	IL6	1	geneontology_Biological_Process	0.0344827586206897
GO:0048569	post-embryonic animal organ development	1/29	14/17913	0.0224361913971004	0.0368254802259828	0.00937449197299961	VEGFA	1	geneontology_Biological_Process	0.0344827586206897
GO:0048841	regulation of axon extension involved in axon guidance	1/29	14/17913	0.0224361913971004	0.0368254802259828	0.00937449197299961	VEGFA	1	geneontology_Biological_Process	0.0344827586206897
GO:0070234	positive regulation of T cell apoptotic process	1/29	14/17913	0.0224361913971004	0.0368254802259828	0.00937449197299961	TP53	1	geneontology_Biological_Process	0.0344827586206897
GO:0070669	response to interleukin-2	1/29	14/17913	0.0224361913971004	0.0368254802259828	0.00937449197299961	IL2	1	geneontology_Biological_Process	0.0344827586206897
GO:0071391	cellular response to estrogen stimulus	1/29	14/17913	0.0224361913971004	0.0368254802259828	0.00937449197299961	ESR1	1	geneontology_Biological_Process	0.0344827586206897
GO:0071801	regulation of podosome assembly	1/29	14/17913	0.0224361913971004	0.0368254802259828	0.00937449197299961	TNF	1	geneontology_Biological_Process	0.0344827586206897
GO:0072567	chemokine (C-X-C motif) ligand 2 production	1/29	14/17913	0.0224361913971004	0.0368254802259828	0.00937449197299961	TNF	1	geneontology_Biological_Process	0.0344827586206897
GO:1900121	negative regulation of receptor binding	1/29	14/17913	0.0224361913971004	0.0368254802259828	0.00937449197299961	IL10	1	geneontology_Biological_Process	0.0344827586206897
GO:1903054	negative regulation of extracellular matrix organization	1/29	14/17913	0.0224361913971004	0.0368254802259828	0.00937449197299961	TGFB1	1	geneontology_Biological_Process	0.0344827586206897
GO:1903624	regulation of DNA catabolic process	1/29	14/17913	0.0224361913971004	0.0368254802259828	0.00937449197299961	IL6	1	geneontology_Biological_Process	0.0344827586206897
GO:0035148	tube formation	2/29	144/17913	0.0226089932520713	0.0370872655641688	0.00944113345428956	TGFB1/VEGFA	2	geneontology_Biological_Process	0.0689655172413793
GO:0048592	eye morphogenesis	2/29	145/17913	0.0229024490976486	0.0375024239924481	0.00954681841289825	BCL2/VEGFA	2	geneontology_Biological_Process	0.0689655172413793
GO:0055002	striated muscle cell development	2/29	145/17913	0.0229024490976486	0.0375024239924481	0.00954681841289825	BCL2/VEGFA	2	geneontology_Biological_Process	0.0689655172413793
GO:0060402	calcium ion transport into cytosol	2/29	145/17913	0.0229024490976486	0.0375024239924481	0.00954681841289825	BCL2/TGFB1	2	geneontology_Biological_Process	0.0689655172413793
GO:1902652	secondary alcohol metabolic process	2/29	147/17913	0.0234941218361767	0.038448689111817	0.00978770474245639	SP1/IL4	2	geneontology_Biological_Process	0.0689655172413793
GO:0017014	protein nitrosylation	1/29	15/17913	0.0240200424753443	0.038718252387961	0.00985632621739493	NOS2	1	geneontology_Biological_Process	0.0344827586206897
GO:0018119	peptidyl-cysteine S-nitrosylation	1/29	15/17913	0.0240200424753443	0.038718252387961	0.00985632621739493	NOS2	1	geneontology_Biological_Process	0.0344827586206897
GO:0030812	negative regulation of nucleotide catabolic process	1/29	15/17913	0.0240200424753443	0.038718252387961	0.00985632621739493	TP53	1	geneontology_Biological_Process	0.0344827586206897
GO:0032645	regulation of granulocyte macrophage colony-stimulating factor production	1/29	15/17913	0.0240200424753443	0.038718252387961	0.00985632621739493	IL1B	1	geneontology_Biological_Process	0.0344827586206897
GO:0032736	positive regulation of interleukin-13 production	1/29	15/17913	0.0240200424753443	0.038718252387961	0.00985632621739493	IL4	1	geneontology_Biological_Process	0.0344827586206897
GO:0033689	negative regulation of osteoblast proliferation	1/29	15/17913	0.0240200424753443	0.038718252387961	0.00985632621739493	BCL2	1	geneontology_Biological_Process	0.0344827586206897
GO:0034616	response to laminar fluid shear stress	1/29	15/17913	0.0240200424753443	0.038718252387961	0.00985632621739493	TGFB1	1	geneontology_Biological_Process	0.0344827586206897
GO:0035635	entry of bacterium into host cell	1/29	15/17913	0.0240200424753443	0.038718252387961	0.00985632621739493	CXCL8	1	geneontology_Biological_Process	0.0344827586206897
GO:0042762	regulation of sulfur metabolic process	1/29	15/17913	0.0240200424753443	0.038718252387961	0.00985632621739493	SP1	1	geneontology_Biological_Process	0.0344827586206897
GO:0042994	cytoplasmic sequestering of transcription factor	1/29	15/17913	0.0240200424753443	0.038718252387961	0.00985632621739493	IL10	1	geneontology_Biological_Process	0.0344827586206897
GO:0045091	regulation of single stranded viral RNA replication via double stranded DNA intermediate	1/29	15/17913	0.0240200424753443	0.038718252387961	0.00985632621739493	CXCL8	1	geneontology_Biological_Process	0.0344827586206897
GO:0045414	regulation of interleukin-8 biosynthetic process	1/29	15/17913	0.0240200424753443	0.038718252387961	0.00985632621739493	TNF	1	geneontology_Biological_Process	0.0344827586206897
GO:0045838	positive regulation of membrane potential	1/29	15/17913	0.0240200424753443	0.038718252387961	0.00985632621739493	AKT1	1	geneontology_Biological_Process	0.0344827586206897
GO:0051198	negative regulation of coenzyme metabolic process	1/29	15/17913	0.0240200424753443	0.038718252387961	0.00985632621739493	TP53	1	geneontology_Biological_Process	0.0344827586206897
GO:0051280	negative regulation of release of sequestered calcium ion into cytosol	1/29	15/17913	0.0240200424753443	0.038718252387961	0.00985632621739493	TGFB1	1	geneontology_Biological_Process	0.0344827586206897
GO:0060841	venous blood vessel development	1/29	15/17913	0.0240200424753443	0.038718252387961	0.00985632621739493	VEGFA	1	geneontology_Biological_Process	0.0344827586206897
GO:0070935	3'-UTR-mediated mRNA stabilization	1/29	15/17913	0.0240200424753443	0.038718252387961	0.00985632621739493	MAPK14	1	geneontology_Biological_Process	0.0344827586206897
GO:0071380	cellular response to prostaglandin E stimulus	1/29	15/17913	0.0240200424753443	0.038718252387961	0.00985632621739493	AKT1	1	geneontology_Biological_Process	0.0344827586206897
GO:0072075	metanephric mesenchyme development	1/29	15/17913	0.0240200424753443	0.038718252387961	0.00985632621739493	STAT1	1	geneontology_Biological_Process	0.0344827586206897
GO:0072160	nephron tubule epithelial cell differentiation	1/29	15/17913	0.0240200424753443	0.038718252387961	0.00985632621739493	STAT1	1	geneontology_Biological_Process	0.0344827586206897
GO:0090197	positive regulation of chemokine secretion	1/29	15/17913	0.0240200424753443	0.038718252387961	0.00985632621739493	TNF	1	geneontology_Biological_Process	0.0344827586206897
GO:1900239	regulation of phenotypic switching	1/29	15/17913	0.0240200424753443	0.038718252387961	0.00985632621739493	SP1	1	geneontology_Biological_Process	0.0344827586206897
GO:1901741	positive regulation of myoblast fusion	1/29	15/17913	0.0240200424753443	0.038718252387961	0.00985632621739493	MAPK14	1	geneontology_Biological_Process	0.0344827586206897
GO:1902001	fatty acid transmembrane transport	1/29	15/17913	0.0240200424753443	0.038718252387961	0.00985632621739493	AKT1	1	geneontology_Biological_Process	0.0344827586206897
GO:1903543	positive regulation of exosomal secretion	1/29	15/17913	0.0240200424753443	0.038718252387961	0.00985632621739493	IFNG	1	geneontology_Biological_Process	0.0344827586206897
GO:2001028	positive regulation of endothelial cell chemotaxis	1/29	15/17913	0.0240200424753443	0.038718252387961	0.00985632621739493	VEGFA	1	geneontology_Biological_Process	0.0344827586206897
GO:0043062	extracellular structure organization	3/29	387/17913	0.0241286265412916	0.0388707989425317	0.00989515928739311	IL6/TNF/TGFB1	3	geneontology_Biological_Process	0.103448275862069
GO:0006754	ATP biosynthetic process	2/29	150/17913	0.0243934507742689	0.0392293983311525	0.00998644627318445	TP53/TGFB1	2	geneontology_Biological_Process	0.0689655172413793
GO:0007088	regulation of mitotic nuclear division	2/29	150/17913	0.0243934507742689	0.0392293983311525	0.00998644627318445	IL1B/TGFB1	2	geneontology_Biological_Process	0.0689655172413793
GO:0030902	hindbrain development	2/29	150/17913	0.0243934507742689	0.0392293983311525	0.00998644627318445	TP53/BCL2	2	geneontology_Biological_Process	0.0689655172413793
GO:0034767	positive regulation of ion transmembrane transport	2/29	152/17913	0.0250008191902049	0.0401366838036296	0.0102174097345368	IFNG/CCL2	2	geneontology_Biological_Process	0.0689655172413793
GO:1903707	negative regulation of hemopoiesis	2/29	152/17913	0.0250008191902049	0.0401366838036296	0.0102174097345368	IL2/IL4	2	geneontology_Biological_Process	0.0689655172413793
GO:1990845	adaptive thermogenesis	2/29	152/17913	0.0250008191902049	0.0401366838036296	0.0102174097345368	IL4/VEGFA	2	geneontology_Biological_Process	0.0689655172413793
GO:0050808	synapse organization	3/29	394/17913	0.0252743650728766	0.0401955533623133	0.010232395885483	MAPK14/TNF/IL10	3	geneontology_Biological_Process	0.103448275862069
GO:0001780	neutrophil homeostasis	1/29	16/17913	0.0256014157443245	0.0401955533623133	0.010232395885483	IL6	1	geneontology_Biological_Process	0.0344827586206897
GO:0002070	epithelial cell maturation	1/29	16/17913	0.0256014157443245	0.0401955533623133	0.010232395885483	CDKN1A	1	geneontology_Biological_Process	0.0344827586206897
GO:0002295	T-helper cell lineage commitment	1/29	16/17913	0.0256014157443245	0.0401955533623133	0.010232395885483	IL6	1	geneontology_Biological_Process	0.0344827586206897
GO:0002830	positive regulation of type 2 immune response	1/29	16/17913	0.0256014157443245	0.0401955533623133	0.010232395885483	IL6	1	geneontology_Biological_Process	0.0344827586206897
GO:0007096	regulation of exit from mitosis	1/29	16/17913	0.0256014157443245	0.0401955533623133	0.010232395885483	TGFB1	1	geneontology_Biological_Process	0.0344827586206897
GO:0008340	determination of adult lifespan	1/29	16/17913	0.0256014157443245	0.0401955533623133	0.010232395885483	TP53	1	geneontology_Biological_Process	0.0344827586206897
GO:0010225	response to UV-C	1/29	16/17913	0.0256014157443245	0.0401955533623133	0.010232395885483	TP53	1	geneontology_Biological_Process	0.0344827586206897
GO:0010934	macrophage cytokine production	1/29	16/17913	0.0256014157443245	0.0401955533623133	0.010232395885483	TGFB1	1	geneontology_Biological_Process	0.0344827586206897
GO:0030214	hyaluronan catabolic process	1/29	16/17913	0.0256014157443245	0.0401955533623133	0.010232395885483	TGFB1	1	geneontology_Biological_Process	0.0344827586206897
GO:0032305	positive regulation of icosanoid secretion	1/29	16/17913	0.0256014157443245	0.0401955533623133	0.010232395885483	IL1B	1	geneontology_Biological_Process	0.0344827586206897
GO:0032604	granulocyte macrophage colony-stimulating factor production	1/29	16/17913	0.0256014157443245	0.0401955533623133	0.010232395885483	IL1B	1	geneontology_Biological_Process	0.0344827586206897
GO:0032695	negative regulation of interleukin-12 production	1/29	16/17913	0.0256014157443245	0.0401955533623133	0.010232395885483	IL10	1	geneontology_Biological_Process	0.0344827586206897
GO:0033033	negative regulation of myeloid cell apoptotic process	1/29	16/17913	0.0256014157443245	0.0401955533623133	0.010232395885483	BCL2	1	geneontology_Biological_Process	0.0344827586206897
GO:0039692	single stranded viral RNA replication via double stranded DNA intermediate	1/29	16/17913	0.0256014157443245	0.0401955533623133	0.010232395885483	CXCL8	1	geneontology_Biological_Process	0.0344827586206897
GO:0042228	interleukin-8 biosynthetic process	1/29	16/17913	0.0256014157443245	0.0401955533623133	0.010232395885483	TNF	1	geneontology_Biological_Process	0.0344827586206897
GO:0043217	myelin maintenance	1/29	16/17913	0.0256014157443245	0.0401955533623133	0.010232395885483	AKT1	1	geneontology_Biological_Process	0.0344827586206897
GO:0045623	negative regulation of T-helper cell differentiation	1/29	16/17913	0.0256014157443245	0.0401955533623133	0.010232395885483	IL2	1	geneontology_Biological_Process	0.0344827586206897
GO:0045725	positive regulation of glycogen biosynthetic process	1/29	16/17913	0.0256014157443245	0.0401955533623133	0.010232395885483	AKT1	1	geneontology_Biological_Process	0.0344827586206897
GO:0045780	positive regulation of bone resorption	1/29	16/17913	0.0256014157443245	0.0401955533623133	0.010232395885483	EGFR	1	geneontology_Biological_Process	0.0344827586206897
GO:0046325	negative regulation of glucose import	1/29	16/17913	0.0256014157443245	0.0401955533623133	0.010232395885483	TNF	1	geneontology_Biological_Process	0.0344827586206897
GO:0046852	positive regulation of bone remodeling	1/29	16/17913	0.0256014157443245	0.0401955533623133	0.010232395885483	EGFR	1	geneontology_Biological_Process	0.0344827586206897
GO:0048070	regulation of developmental pigmentation	1/29	16/17913	0.0256014157443245	0.0401955533623133	0.010232395885483	BCL2	1	geneontology_Biological_Process	0.0344827586206897
GO:0070242	thymocyte apoptotic process	1/29	16/17913	0.0256014157443245	0.0401955533623133	0.010232395885483	TP53	1	geneontology_Biological_Process	0.0344827586206897
GO:0070886	positive regulation of calcineurin-NFAT signaling cascade	1/29	16/17913	0.0256014157443245	0.0401955533623133	0.010232395885483	TNF	1	geneontology_Biological_Process	0.0344827586206897
GO:0071605	monocyte chemotactic protein-1 production	1/29	16/17913	0.0256014157443245	0.0401955533623133	0.010232395885483	IL1B	1	geneontology_Biological_Process	0.0344827586206897
GO:0071637	regulation of monocyte chemotactic protein-1 production	1/29	16/17913	0.0256014157443245	0.0401955533623133	0.010232395885483	IL1B	1	geneontology_Biological_Process	0.0344827586206897
GO:0072283	metanephric renal vesicle morphogenesis	1/29	16/17913	0.0256014157443245	0.0401955533623133	0.010232395885483	STAT1	1	geneontology_Biological_Process	0.0344827586206897
GO:0090036	regulation of protein kinase C signaling	1/29	16/17913	0.0256014157443245	0.0401955533623133	0.010232395885483	VEGFA	1	geneontology_Biological_Process	0.0344827586206897
GO:0090153	regulation of sphingolipid biosynthetic process	1/29	16/17913	0.0256014157443245	0.0401955533623133	0.010232395885483	TNF	1	geneontology_Biological_Process	0.0344827586206897
GO:0090335	regulation of brown fat cell differentiation	1/29	16/17913	0.0256014157443245	0.0401955533623133	0.010232395885483	MAPK14	1	geneontology_Biological_Process	0.0344827586206897
GO:0106058	positive regulation of calcineurin-mediated signaling	1/29	16/17913	0.0256014157443245	0.0401955533623133	0.010232395885483	TNF	1	geneontology_Biological_Process	0.0344827586206897
GO:1900221	regulation of amyloid-beta clearance	1/29	16/17913	0.0256014157443245	0.0401955533623133	0.010232395885483	IL4	1	geneontology_Biological_Process	0.0344827586206897
GO:1902166	negative regulation of intrinsic apoptotic signaling pathway in response to DNA damage by p53 class mediator	1/29	16/17913	0.0256014157443245	0.0401955533623133	0.010232395885483	BCL2	1	geneontology_Biological_Process	0.0344827586206897
GO:1902993	positive regulation of amyloid precursor protein catabolic process	1/29	16/17913	0.0256014157443245	0.0401955533623133	0.010232395885483	CASP3	1	geneontology_Biological_Process	0.0344827586206897
GO:1903541	regulation of exosomal secretion	1/29	16/17913	0.0256014157443245	0.0401955533623133	0.010232395885483	IFNG	1	geneontology_Biological_Process	0.0344827586206897
GO:1905038	regulation of membrane lipid metabolic process	1/29	16/17913	0.0256014157443245	0.0401955533623133	0.010232395885483	TNF	1	geneontology_Biological_Process	0.0344827586206897
GO:2000303	regulation of ceramide biosynthetic process	1/29	16/17913	0.0256014157443245	0.0401955533623133	0.010232395885483	TNF	1	geneontology_Biological_Process	0.0344827586206897
GO:0000723	telomere maintenance	2/29	154/17913	0.0256143892254999	0.0401955533623133	0.010232395885483	MAPK3/MAPK1	2	geneontology_Biological_Process	0.0689655172413793
GO:1901568	fatty acid derivative metabolic process	2/29	154/17913	0.0256143892254999	0.0401955533623133	0.010232395885483	MAPK3/IL1B	2	geneontology_Biological_Process	0.0689655172413793
GO:0016125	sterol metabolic process	2/29	155/17913	0.025923486248804	0.0406120045955125	0.0103384099474536	SP1/IL4	2	geneontology_Biological_Process	0.0689655172413793
GO:0071695	anatomical structure maturation	2/29	155/17913	0.025923486248804	0.0406120045955125	0.0103384099474536	CDKN1A/BCL2	2	geneontology_Biological_Process	0.0689655172413793
GO:1903555	regulation of tumor necrosis factor superfamily cytokine production	2/29	155/17913	0.025923486248804	0.0406120045955125	0.0103384099474536	IL10/IFNG	2	geneontology_Biological_Process	0.0689655172413793
GO:0002429	immune response-activating cell surface receptor signaling pathway	3/29	399/17913	0.0261106715704309	0.0408822705993207	0.0104072103125195	MAPK3/MAPK1/BCL2	3	geneontology_Biological_Process	0.103448275862069
GO:0090288	negative regulation of cellular response to growth factor stimulus	2/29	156/17913	0.0262341173799832	0.0410524902515514	0.01045054234115	TP53/TGFB1	2	geneontology_Biological_Process	0.0689655172413793
GO:0060401	cytosolic calcium ion transport	2/29	157/17913	0.0265462772126728	0.0415176625093822	0.010568959088748	BCL2/TGFB1	2	geneontology_Biological_Process	0.0689655172413793
GO:0043488	regulation of mRNA stability	2/29	158/17913	0.0268599603529256	0.0419846940569847	0.0106878491471334	MAPK14/AKT1	2	geneontology_Biological_Process	0.0689655172413793
GO:0009206	purine ribonucleoside triphosphate biosynthetic process	2/29	159/17913	0.027175161419188	0.0421544450438296	0.0107310618697869	TP53/TGFB1	2	geneontology_Biological_Process	0.0689655172413793
GO:0055001	muscle cell development	2/29	159/17913	0.027175161419188	0.0421544450438296	0.0107310618697869	BCL2/VEGFA	2	geneontology_Biological_Process	0.0689655172413793
GO:0030540	female genitalia development	1/29	17/17913	0.0271803149421463	0.0421544450438296	0.0107310618697869	ESR1	1	geneontology_Biological_Process	0.0344827586206897
GO:0032966	negative regulation of collagen biosynthetic process	1/29	17/17913	0.0271803149421463	0.0421544450438296	0.0107310618697869	IL6	1	geneontology_Biological_Process	0.0344827586206897
GO:0042268	regulation of cytolysis	1/29	17/17913	0.0271803149421463	0.0421544450438296	0.0107310618697869	TGFB1	1	geneontology_Biological_Process	0.0344827586206897
GO:0043373	CD4-positive, alpha-beta T cell lineage commitment	1/29	17/17913	0.0271803149421463	0.0421544450438296	0.0107310618697869	IL6	1	geneontology_Biological_Process	0.0344827586206897
GO:0048535	lymph node development	1/29	17/17913	0.0271803149421463	0.0421544450438296	0.0107310618697869	TGFB1	1	geneontology_Biological_Process	0.0344827586206897
GO:0051284	positive regulation of sequestering of calcium ion	1/29	17/17913	0.0271803149421463	0.0421544450438296	0.0107310618697869	TGFB1	1	geneontology_Biological_Process	0.0344827586206897
GO:0060644	mammary gland epithelial cell differentiation	1/29	17/17913	0.0271803149421463	0.0421544450438296	0.0107310618697869	AKT1	1	geneontology_Biological_Process	0.0344827586206897
GO:0070875	positive regulation of glycogen metabolic process	1/29	17/17913	0.0271803149421463	0.0421544450438296	0.0107310618697869	AKT1	1	geneontology_Biological_Process	0.0344827586206897
GO:0090185	negative regulation of kidney development	1/29	17/17913	0.0271803149421463	0.0421544450438296	0.0107310618697869	STAT1	1	geneontology_Biological_Process	0.0344827586206897
GO:1901524	regulation of mitophagy	1/29	17/17913	0.0271803149421463	0.0421544450438296	0.0107310618697869	TP53	1	geneontology_Biological_Process	0.0344827586206897
GO:1903209	positive regulation of oxidative stress-induced cell death	1/29	17/17913	0.0271803149421463	0.0421544450438296	0.0107310618697869	MCL1	1	geneontology_Biological_Process	0.0344827586206897
GO:1904996	positive regulation of leukocyte adhesion to vascular endothelial cell	1/29	17/17913	0.0271803149421463	0.0421544450438296	0.0107310618697869	TNF	1	geneontology_Biological_Process	0.0344827586206897
GO:0009145	purine nucleoside triphosphate biosynthetic process	2/29	160/17913	0.0274918750422758	0.0426139353408357	0.0108480321869293	TP53/TGFB1	2	geneontology_Biological_Process	0.0689655172413793
GO:0006986	response to unfolded protein	2/29	161/17913	0.0278100958653511	0.0430592984315186	0.010961406206577	CXCL8/CCL2	2	geneontology_Biological_Process	0.0689655172413793
GO:0071706	tumor necrosis factor superfamily cytokine production	2/29	161/17913	0.0278100958653511	0.0430592984315186	0.010961406206577	IL10/IFNG	2	geneontology_Biological_Process	0.0689655172413793
GO:0043588	skin development	3/29	412/17913	0.0283549381592489	0.0438785189615918	0.0111699513833448	TNF/EGFR/BCL2	3	geneontology_Biological_Process	0.103448275862069
GO:0043487	regulation of RNA stability	2/29	163/17913	0.0284510377456994	0.0440027981116894	0.0112015885510844	MAPK14/AKT1	2	geneontology_Biological_Process	0.0689655172413793
GO:0007221	positive regulation of transcription of Notch receptor target	1/29	18/17913	0.0287567438014826	0.0440375816014919	0.0112104432230112	STAT1	1	geneontology_Biological_Process	0.0344827586206897
GO:0007252	I-kappaB phosphorylation	1/29	18/17913	0.0287567438014826	0.0440375816014919	0.0112104432230112	AKT1	1	geneontology_Biological_Process	0.0344827586206897
GO:0010713	negative regulation of collagen metabolic process	1/29	18/17913	0.0287567438014826	0.0440375816014919	0.0112104432230112	IL6	1	geneontology_Biological_Process	0.0344827586206897
GO:0031293	membrane protein intracellular domain proteolysis	1/29	18/17913	0.0287567438014826	0.0440375816014919	0.0112104432230112	TGFB1	1	geneontology_Biological_Process	0.0344827586206897
GO:0031998	regulation of fatty acid beta-oxidation	1/29	18/17913	0.0287567438014826	0.0440375816014919	0.0112104432230112	AKT1	1	geneontology_Biological_Process	0.0344827586206897
GO:0032793	positive regulation of CREB transcription factor activity	1/29	18/17913	0.0287567438014826	0.0440375816014919	0.0112104432230112	VEGFA	1	geneontology_Biological_Process	0.0344827586206897
GO:0036166	phenotypic switching	1/29	18/17913	0.0287567438014826	0.0440375816014919	0.0112104432230112	SP1	1	geneontology_Biological_Process	0.0344827586206897
GO:0036303	lymph vessel morphogenesis	1/29	18/17913	0.0287567438014826	0.0440375816014919	0.0112104432230112	VEGFA	1	geneontology_Biological_Process	0.0344827586206897
GO:0060977	coronary vasculature morphogenesis	1/29	18/17913	0.0287567438014826	0.0440375816014919	0.0112104432230112	VEGFA	1	geneontology_Biological_Process	0.0344827586206897
GO:0071800	podosome assembly	1/29	18/17913	0.0287567438014826	0.0440375816014919	0.0112104432230112	TNF	1	geneontology_Biological_Process	0.0344827586206897
GO:0090196	regulation of chemokine secretion	1/29	18/17913	0.0287567438014826	0.0440375816014919	0.0112104432230112	TNF	1	geneontology_Biological_Process	0.0344827586206897
GO:0097094	craniofacial suture morphogenesis	1/29	18/17913	0.0287567438014826	0.0440375816014919	0.0112104432230112	TGFB1	1	geneontology_Biological_Process	0.0344827586206897
GO:1901739	regulation of myoblast fusion	1/29	18/17913	0.0287567438014826	0.0440375816014919	0.0112104432230112	MAPK14	1	geneontology_Biological_Process	0.0344827586206897
GO:1902165	regulation of intrinsic apoptotic signaling pathway in response to DNA damage by p53 class mediator	1/29	18/17913	0.0287567438014826	0.0440375816014919	0.0112104432230112	BCL2	1	geneontology_Biological_Process	0.0344827586206897
GO:1902176	negative regulation of oxidative stress-induced intrinsic apoptotic signaling pathway	1/29	18/17913	0.0287567438014826	0.0440375816014919	0.0112104432230112	AKT1	1	geneontology_Biological_Process	0.0344827586206897
GO:2000193	positive regulation of fatty acid transport	1/29	18/17913	0.0287567438014826	0.0440375816014919	0.0112104432230112	IL1B	1	geneontology_Biological_Process	0.0344827586206897
GO:2000319	regulation of T-helper 17 cell differentiation	1/29	18/17913	0.0287567438014826	0.0440375816014919	0.0112104432230112	IL2	1	geneontology_Biological_Process	0.0344827586206897
GO:0009201	ribonucleoside triphosphate biosynthetic process	2/29	164/17913	0.0287737481508133	0.0440375816014919	0.0112104432230112	TP53/TGFB1	2	geneontology_Biological_Process	0.0689655172413793
GO:0071466	cellular response to xenobiotic stimulus	2/29	164/17913	0.0287737481508133	0.0440375816014919	0.0112104432230112	EGFR/TGFB1	2	geneontology_Biological_Process	0.0689655172413793
GO:0006816	calcium ion transport	3/29	415/17913	0.0288871683474199	0.0441869035039842	0.0112484554082622	BCL2/TGFB1/CCL2	3	geneontology_Biological_Process	0.103448275862069
GO:0021543	pallium development	2/29	166/17913	0.0294236213524434	0.044958131967796	0.0114447834669592	CASP3/EGFR	2	geneontology_Biological_Process	0.0689655172413793
GO:2001257	regulation of cation channel activity	2/29	166/17913	0.0294236213524434	0.044958131967796	0.0114447834669592	IFNG/CCL2	2	geneontology_Biological_Process	0.0689655172413793
GO:0032200	telomere organization	2/29	167/17913	0.0297507735702384	0.0454082179300407	0.0115593597661502	MAPK3/MAPK1	2	geneontology_Biological_Process	0.0689655172413793
GO:0033209	tumor necrosis factor-mediated signaling pathway	2/29	167/17913	0.0297507735702384	0.0454082179300407	0.0115593597661502	STAT1/TNF	2	geneontology_Biological_Process	0.0689655172413793
GO:0001502	cartilage condensation	1/29	19/17913	0.0303307060495828	0.0457422498702312	0.0116443927303593	MAPK14	1	geneontology_Biological_Process	0.0344827586206897
GO:0002689	negative regulation of leukocyte chemotaxis	1/29	19/17913	0.0303307060495828	0.0457422498702312	0.0116443927303593	CCL2	1	geneontology_Biological_Process	0.0344827586206897
GO:0002827	positive regulation of T-helper 1 type immune response	1/29	19/17913	0.0303307060495828	0.0457422498702312	0.0116443927303593	IL1B	1	geneontology_Biological_Process	0.0344827586206897
GO:0010663	positive regulation of striated muscle cell apoptotic process	1/29	19/17913	0.0303307060495828	0.0457422498702312	0.0116443927303593	TP53	1	geneontology_Biological_Process	0.0344827586206897
GO:0010666	positive regulation of cardiac muscle cell apoptotic process	1/29	19/17913	0.0303307060495828	0.0457422498702312	0.0116443927303593	TP53	1	geneontology_Biological_Process	0.0344827586206897
GO:0032042	mitochondrial DNA metabolic process	1/29	19/17913	0.0303307060495828	0.0457422498702312	0.0116443927303593	TP53	1	geneontology_Biological_Process	0.0344827586206897
GO:0032069	regulation of nuclease activity	1/29	19/17913	0.0303307060495828	0.0457422498702312	0.0116443927303593	AKT1	1	geneontology_Biological_Process	0.0344827586206897
GO:0032303	regulation of icosanoid secretion	1/29	19/17913	0.0303307060495828	0.0457422498702312	0.0116443927303593	IL1B	1	geneontology_Biological_Process	0.0344827586206897
GO:0032495	response to muramyl dipeptide	1/29	19/17913	0.0303307060495828	0.0457422498702312	0.0116443927303593	MAPK14	1	geneontology_Biological_Process	0.0344827586206897
GO:0032891	negative regulation of organic acid transport	1/29	19/17913	0.0303307060495828	0.0457422498702312	0.0116443927303593	AKT1	1	geneontology_Biological_Process	0.0344827586206897
GO:0034104	negative regulation of tissue remodeling	1/29	19/17913	0.0303307060495828	0.0457422498702312	0.0116443927303593	IL6	1	geneontology_Biological_Process	0.0344827586206897
GO:0035458	cellular response to interferon-beta	1/29	19/17913	0.0303307060495828	0.0457422498702312	0.0116443927303593	STAT1	1	geneontology_Biological_Process	0.0344827586206897
GO:0043153	entrainment of circadian clock by photoperiod	1/29	19/17913	0.0303307060495828	0.0457422498702312	0.0116443927303593	TP53	1	geneontology_Biological_Process	0.0344827586206897
GO:0045076	regulation of interleukin-2 biosynthetic process	1/29	19/17913	0.0303307060495828	0.0457422498702312	0.0116443927303593	IL1B	1	geneontology_Biological_Process	0.0344827586206897
GO:0045663	positive regulation of myoblast differentiation	1/29	19/17913	0.0303307060495828	0.0457422498702312	0.0116443927303593	MAPK14	1	geneontology_Biological_Process	0.0344827586206897
GO:0071294	cellular response to zinc ion	1/29	19/17913	0.0303307060495828	0.0457422498702312	0.0116443927303593	CREB1	1	geneontology_Biological_Process	0.0344827586206897
GO:0072074	kidney mesenchyme development	1/29	19/17913	0.0303307060495828	0.0457422498702312	0.0116443927303593	STAT1	1	geneontology_Biological_Process	0.0344827586206897
GO:0072077	renal vesicle morphogenesis	1/29	19/17913	0.0303307060495828	0.0457422498702312	0.0116443927303593	STAT1	1	geneontology_Biological_Process	0.0344827586206897
GO:0090280	positive regulation of calcium ion import	1/29	19/17913	0.0303307060495828	0.0457422498702312	0.0116443927303593	CCL2	1	geneontology_Biological_Process	0.0344827586206897
GO:1902074	response to salt	1/29	19/17913	0.0303307060495828	0.0457422498702312	0.0116443927303593	TGFB1	1	geneontology_Biological_Process	0.0344827586206897
GO:1990182	exosomal secretion	1/29	19/17913	0.0303307060495828	0.0457422498702312	0.0116443927303593	IFNG	1	geneontology_Biological_Process	0.0344827586206897
GO:2000696	regulation of epithelial cell differentiation involved in kidney development	1/29	19/17913	0.0303307060495828	0.0457422498702312	0.0116443927303593	STAT1	1	geneontology_Biological_Process	0.0344827586206897
[truncated: 164 more rows]
